# Supplementary material for: Electrochemical C–H functionalization reaction of N-heterocycles with alkyl iodides
Source: Royal Society of Chemistry journal article supplement (doi:10.1039/d5cc01836f), 2025-01-01

# Electrochemical C-H functionalization reaction of *N*-heterocycles with alkyl iodides

Yaseen Hussain,<sup>a</sup> Ganga Sankar,<sup>a</sup> Magnus Rueping<sup>b,\*</sup> and Rene M. Koenigs<sup>a,c\*</sup>

<sup>a</sup>Institute of Organic Chemistry, RWTH Aachen University, Landoltweg 1, D-52074 Aachen, Germany. email: email: [rene.koenigs@rwth-aachen.de](mailto:rene.koenigs@rwth-aachen.de)

<sup>b</sup>KAUST Catalysis Center (KCC), King Abdullah University of Science and Technology (KAUST), Thuwal 23955-6900, Saudi Arabia. email: [magnus.rueping@kaust.edu.sa](mailto:magnus.rueping@kaust.edu.sa)

<sup>c</sup>Department of Chemistry, University of Bayreuth, Universitätsstraße 30, 95447 Bayreuth, Germany. email: [rene.koenigs@uni-bayreuth.de](mailto:rene.koenigs@uni-bayreuth.de)

## Table of Contents

|                                                     |         |
|-----------------------------------------------------|---------|
| 1. General Information                              | S1      |
| 2. Optimization Tables for Alkylation of Aza-Uracil | S2      |
| 3. Incompatible Substrates                          | S3      |
| 4. Experimental Procedures and Spectroscopic Data   | S3-S17  |
| 5. Radical quenching experiment                     | S18     |
| 6. References                                       | S18     |
| 7. NMR spectra                                      | S19-S50 |

## 1. General Information

Unless otherwise noted, all commercially available compounds were used as provided without further purification. Chemicals used in this manuscript were purchased from Sigma Aldrich, Alfa Aesar, Fluorochem and Carl Roth. Solvents used in reactions were p.A. grade. Solvents for chromatography were technical grade and distilled prior to use. Analytical thin-layer chromatography (TLC) was performed on Macherey-Nagel silica gel aluminium plates with F254 indicator, visualized by irradiation with UV light. Column chromatography was performed using silica gel Merck 60 (particle size 0.063 – 0.2 mm). Solvent mixtures are understood as volume/volume.  $^1\text{H}$  NMR and  $^{13}\text{C}$  NMR were recorded on a Varian AV600/AV400, an Agilent DD2 400 NMR spectrometer, or a Bruker 500 MHz NMR spectrometer in  $\text{CDCl}_3$ . Data are reported in the following order: chemical shift ( $\delta$ ) in ppm; multiplicities are indicated br (broadened singlet), s (singlet), d (doublet), t (triplet), q (quartet), m (multiplet); coupling constants (J) are in Hertz (Hz). HRMS data were recorded on a ThermoFisher Scientific LTQ Orbitrap XL using ESI ionization or on a Finnigan MAT 95 using EI ionization at 70 eV of an Agilent 6500 Q-TOF spectrometer.

## 2. Optimization Tables for Alkylation of Aza-Uracil.

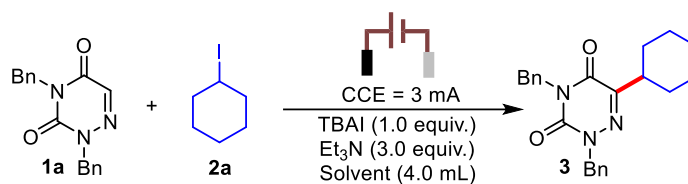

| Entry | Electrode       | Solvent     | Time(h) | Yield of 3 [%] |
|-------|-----------------|-------------|---------|----------------|
| 1     | GF(+) and GF(-) | MeCN        | 30      | 13             |
| 2     | GF(+) and Pt(-) | MeCN        | 30      | -              |
| 3     | GF(+) and Ni(-) | MeCN        | 30      | 33             |
| 4     | GF(+) and Ni(-) | DCM         | 30      | 61             |
| 5     | GF(+) and Ni(-) | 1,4-Dioxane | 24      | -              |
| 6     | GF(+) and Ni(-) | DMF         | 24      | traces         |
| 7     | GF(+) and Ni(-) | THF         | 20      | 31             |
| 8     | GF(+) and Ni(-) | HFIP        | 31      | 77             |
| 9     | GF(+) and Ni(-) | TFE         | 30      | 86             |
| 10    | GF(+) and Ni(-) | MeOH        | 17      | 18             |

**Reaction conditions:** 1 (0.2 mmol), 2 (2.0 equiv.), TBAI (1.0 equiv.) and Et<sub>3</sub>N (3.0 equiv.) in solvent (4.0 mL) at CCE of 3 mA.

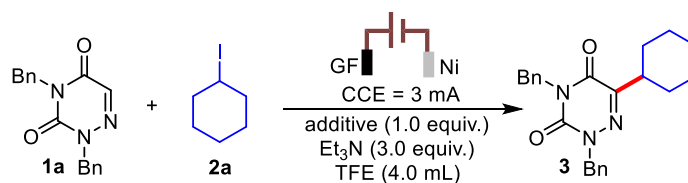

| Entry            | Additive                                       | Time(h) | Yield[%] |
|------------------|------------------------------------------------|---------|----------|
| 1                | <sup>n</sup> Bu <sub>4</sub> NPF <sub>6</sub>  | 50      | 13       |
| 2                | <sup>n</sup> Bu <sub>4</sub> ClO <sub>4</sub>  | 30      | 90       |
| 3                | <sup>n</sup> Bu <sub>4</sub> NBr               | 30      | 69       |
| 4 <sup>[a]</sup> | <sup>n</sup> Bu <sub>4</sub> NClO <sub>4</sub> | 42      | 53       |
| 5 <sup>[b]</sup> | <sup>n</sup> Bu <sub>4</sub> NClO <sub>4</sub> | 42      | 82       |
| 6 <sup>[c]</sup> | <sup>n</sup> Bu <sub>4</sub> NClO <sub>4</sub> | 42      | 69       |
| 7 <sup>[d]</sup> | <sup>n</sup> Bu <sub>4</sub> NClO <sub>4</sub> | 22      | 93       |

**Reaction conditions:** 1a (0.2 mmol), 2a (2.0 equiv.), additive (1.0 equiv.) and Et<sub>3</sub>N (3.0 equiv.) in TFE (4.0 mL) at 6 mA constant current using graphite anode and nickel foam as cathode. <sup>[a]</sup>DIPEA was used instead of Et<sub>3</sub>N. <sup>[b]</sup>Et<sub>3</sub>N (1.0 equiv.) was used. <sup>[c]</sup>2a (1.0 equiv.) was used. <sup>[d]</sup>CCE at 6 mA.

### 3. Incompatible Substrates

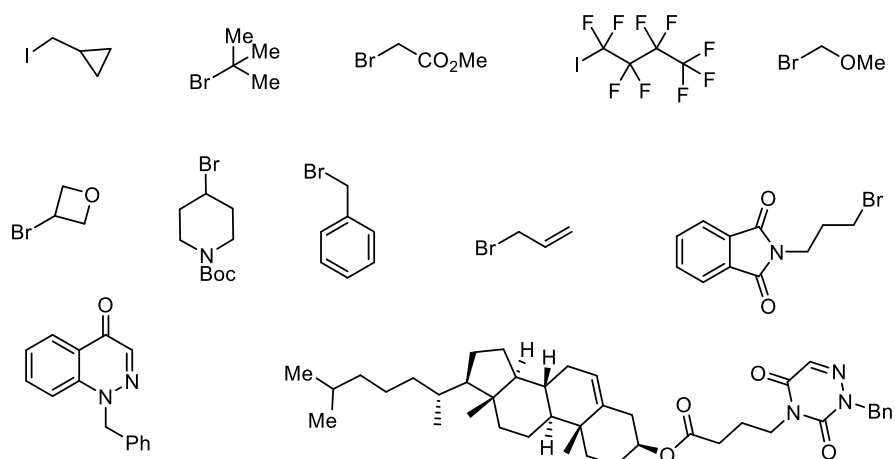

### 4. Experimental Procedures and Spectroscopic Data

#### *General Procedure for the Synthesis of alkylated Aza-Uracils – GP1*

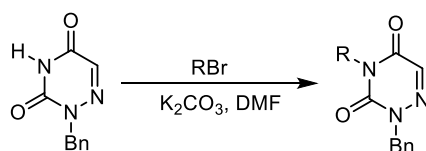

According to a reported procedure,<sup>1</sup> alkyl bromide (2.0 mmol, 1.0 equiv.) was added dropwise to a stirring solution of *N*-1-benzyl-6-aza-uracils (2.0 mmol, 1.0 equiv.), K<sub>2</sub>CO<sub>3</sub> (2.0 mmol, 1.0 equiv.) in DMF (20 mL). The reaction mixture was allowed to stir at room temperature for 16 h. Then, the mixture was quenched with saturated Na<sub>2</sub>CO<sub>3</sub> solution and extracted with DCM for three times. The organic layers were combined, dried over anhydrous Na<sub>2</sub>SO<sub>4</sub> and concentrated under reduced pressure. The crude products were purified through silica gel column chromatography using *n*-hexane : ethyl acetate as eluent to afford the corresponding alkylated aza-uracils.

#### *General Procedure for Electro-catalysed Alkylation of Heterocycles-GP2*

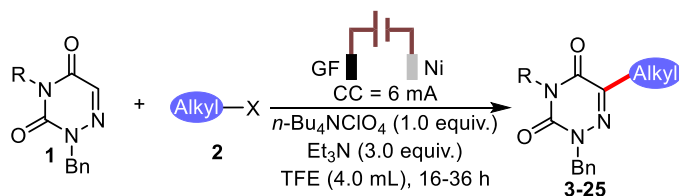

A dry 10 mL vial equipped with a teflon-coated magnetic stir bar was charged with heterocycle substrate **1** (0.2 mmol) and tetrabutylammonium perchlorate (0.2 mmol) followed by addition of trifluoroethanol (4.0 mL). Then alkyl halide **2** (2.0 equiv.) and triethylamine (3.0 equiv.) was added sequentially and electrolyzed at a constant current of 6 mA. After complete conversion of the substrate **1** (indicated by TLC), the electrodes were taken out and washed twice by sonicating in dichloromethane for 5 min. The solvents were combined and concentrated on a rotatory evaporator. The crude mixture was then purified *via* silica gel column chromatography

using a mixture of *n*-hexane : ethyl acetate as eluent to provide the pure alkylated products **3-25**.

#### Methyl 2-(2-benzyl-3,5-dioxo-2,5-dihydro-1,2,4-triazin-4(3*H*)-yl)acetate (**1b**)

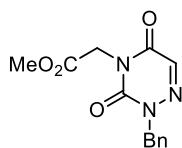

The title compound **1b** was synthesized according to the general procedure (GP-1) using *N*-1-benzyl-6-azauracils (2.0 mmol), methyl bromoacetate (2.0 mmol) and K<sub>2</sub>CO<sub>3</sub> (2.0 mmol) in DMF at room temperature. The product was obtained after silica column chromatography (*n*-hexane : ethyl acetate 4 : 1) as a white solid (75%, 412 mg).

**<sup>1</sup>H NMR** (400 MHz, CDCl<sub>3</sub>) δ 7.46 – 7.42 (m, 3H), 7.33 - 7.28 (m, 3H), 5.09 (s, 2H), 4.69 (s, 2H), 3.78 (s, 3H).

**<sup>13</sup>C NMR** (151 MHz, CDCl<sub>3</sub>) δ 167.8, 155.9, 148.9, 135.2, 135.2, 129.3, 128.8, 128.3, 52.9, 52.7, 44.1.

**HRMS** (ESI, *m/z*) calcd for C<sub>13</sub>H<sub>11</sub>N<sub>3</sub>O<sub>4</sub>Na [M+Na]<sup>+</sup>: 298.0804, found; 298.0811.

#### 2-Benzyl-4-(cyclopropylmethyl)-1,2,4-triazine-3,5(2*H*,4*H*)-dione (**1c**)

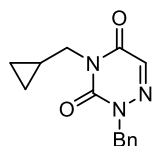

The title compound **1c** was synthesized according to the general procedure (GP-1) using *N*-1-benzyl-6-azauracils (2.0 mmol), (bromomethyl)cyclopropane (2.0 mmol) and K<sub>2</sub>CO<sub>3</sub> (2.0 mmol) in DMF at room temperature. The product was obtained after silica column chromatography (*n*-hexane : ethyl acetate 4 : 1) as a white solid (60%, 309 mg).

**<sup>1</sup>H NMR** (400 MHz, CDCl<sub>3</sub>) δ 7.50 – 7.48 (m, 2H), 7.40 (s, 1H), 7.35 – 7.29 (m, 3H), 5.10 (s, 2H), 3.82 (d, *J* = 7.0 Hz, 2H), 1.28 – 1.23 (m, 1H), 0.58 – 0.53 (m, 2H), 0.40 – 0.37 (m, 2H).

**<sup>13</sup>C NMR** (151 MHz, CDCl<sub>3</sub>) δ 156.2, 148.9, 135.6, 134.2, 129.6, 128.7, 128.2, 56.82, 44.0, 10.1, 3.7.

**HRMS** (ESI, *m/z*) calcd for C<sub>14</sub>H<sub>15</sub>N<sub>3</sub>O<sub>2</sub>Na [M+Na]<sup>+</sup>: 280.1062, found; 280.1057.

#### 2-Benzyl-4-cinnamyl-1,2,4-triazine-3,5(2*H*,4*H*)-dione (**1d**)

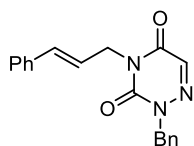

The title compound **1d** was synthesized according to the general procedure (GP-1) using *N*-1-benzyl-6-azauracils (2.0 mmol), cinnamyl bromide (2.0 mmol) and K<sub>2</sub>CO<sub>3</sub> (2.0 mmol) in DMF

at room temperature. The product was obtained after silica column chromatography (*n*-hexane : ethyl acetate 4 : 1) as a white solid (81%, 517 mg).

**<sup>1</sup>H NMR** (400 MHz, CDCl<sub>3</sub>) δ 7.48 (d, *J* = 7.6 Hz, 2H), 7.41 (s, 1H), 7.36 (d, *J* = 7.8 Hz, 2H), 7.31 – 7.24 (m, 6H), 6.65 (d, *J* = 16.0 Hz, 1H), 6.33 – 6.21 (m, 1H), 5.08 (s, 2H), 4.69 (d, *J* = 6.7 Hz, 2H).

**<sup>13</sup>C NMR** (151 MHz, CDCl<sub>3</sub>) δ 156.1, 148.6, 136.1, 135.5, 135.2, 134.7, 129.6, 128.7, 128.3, 128.3, 126.8, 122.1, 54.1, 44.1.

### 2-Benzyl-4-butyl-1,2,4-triazine-3,5(2*H*,4*H*)-dione (1e)

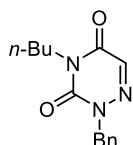

The title compound **1e** was synthesized according to the general procedure (GP-1) using *N*-1-benzyl-6-azauracils (2.0 mmol), 1-bromobutane (2.0 mmol) and K<sub>2</sub>CO<sub>3</sub> (2.0 mmol) in DMF at room temperature. The product was obtained after silica column chromatography (*n*-hexane : ethyl acetate 4 : 1) as a white solid (80%, 415 mg).

**<sup>1</sup>H NMR** (600 MHz, CDCl<sub>3</sub>) δ 7.49 – 7.47 (m, 2H), 7.39 (s, 1H), 7.33 – 7.27 (m, 3H), 5.08 (s, 2H), 3.95 (t, 2H), 1.74 – 1.69 (m, 2H), 1.39 – 1.33 (m, 2H), 0.95 (t, *J* = 7.4 Hz, 3H).

**<sup>13</sup>C NMR** (151 MHz, CDCl<sub>3</sub>) δ 156.0, 148.7, 135.6, 134.1, 129.4, 128.6, 128.1, 51.7, 43.9, 30.2, 19.7, 13.7.

**HRMS (ESI)** *m/z* calcd for C<sub>14</sub>H<sub>17</sub>N<sub>3</sub>O<sub>2</sub>Na [M+Na]<sup>+</sup> : 282.1213; Found: 282.1213.

### (1*R*,2*R*,4*R*)-4,7,7-trimethylbicyclo[2.2.1]heptan-2-yl 4-((2-benzyl-3,5-dioxo-2,5-dihydro-1,2,4-triazin-4(3*H*)-yl)methyl)benzoate (1f)

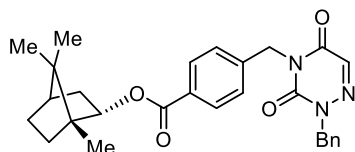

The title compound **1f** was synthesized according to the general procedure (GP-1) using *N*-1-benzyl-6-azauracils (2.0 mmol), (1*R*,2*R*,4*R*)-1,7,7-trimethylbicyclo[2.2.1]heptan-2-yl 4-(bromomethyl)benzoate (2.0 mmol) and K<sub>2</sub>CO<sub>3</sub> (2.0 mmol) in DMF at room temperature. The product was obtained after silica column chromatography (*n*-hexane : ethyl acetate 4 : 1) as a white solid (62%, 614 mg).

**<sup>1</sup>H NMR** (600 MHz, CDCl<sub>3</sub>) δ 8.04 (d, *J* = 8.2 Hz, 2H), 7.45 (dd, *J* = 8.0, 6.0 Hz, 4H), 7.41 (s, 1H), 7.34 – 7.26 (m, 3H), 5.14 (s, 2H), 5.13 – 5.08 (m, 1H), 5.06 (s, 2H), 2.51 – 2.42 (m, 1H), 2.10 (ddd, *J* = 13.5, 9.4, 4.4 Hz, 1H), 1.80 (ddt, *J* = 12.0, 8.0, 3.9 Hz, 1H), 1.73 (t, *J* = 4.5 Hz, 1H), 1.43 – 1.37 (m, 1H), 1.32 – 1.27 (m, 1H), 1.09 (dd, *J* = 13.8, 3.5 Hz, 1H), 0.96 (s, 3H), 0.91 (s, 3H), 0.90 (s, 3H).

**<sup>13</sup>C NMR** (151 MHz, CDCl<sub>3</sub>) δ 166.4, 155.9, 148.8, 140.2, 135.4, 134.9, 131.0, 130.14, 129.5, 128.7, 128.6, 128.3, 80.8, 55.2, 49.2, 48.0, 45.1, 44.1, 37.0, 28.2, 27.5, 19.8, 19.0, 13.7.

**HRMS** (ESI, m/z) calcd for C<sub>28</sub>H<sub>31</sub>N<sub>3</sub>O<sub>4</sub>Na [M+Na]<sup>+</sup>: 496.2212, found; 496.2202.

**3-(2-benzyl-3,5-dioxo-2,5-dihydro-1,2,4-triazin-4(3*H*)-yl)propyl 2-(4-(2,2-dichlorocyclopropyl)phenoxy)-2-methylpropanoate (1g)**

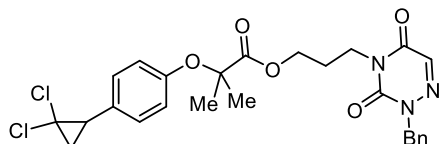

The title compound **1g** was synthesized according to the general procedure (GP-1) using *N*-1-benzyl-6-azauracils (1.0 mmol), 2-bromoethyl 2-(4-(2,2-dichlorocyclopropyl)phenoxy)-2-methylpropanoate (1.0 mmol) and K<sub>2</sub>CO<sub>3</sub> (1.0 mmol) in DMF at room temperature. The product was obtained after silica column chromatography (*n*-hexane : ethyl acetate 4 : 1) as a white solid (75%, 415 mg).

**<sup>1</sup>H NMR** (600 MHz, CDCl<sub>3</sub>) δ 7.46 – 7.45 (m, 2H), 7.34 – 7.28 (m, 3H), 7.10 (d, *J* = 8.7 Hz, 2H), 6.80 (d, *J* = 8.6 Hz, 2H), 5.04 (s, 2H), 4.21 (t, *J* = 6.1 Hz, 2H), 3.92 – 3.89 (m, 2H), 2.83 – 2.80 (m, 1H), 2.07 – 2.03 (m, 2H), 1.93 – 1.90 (m, 1H), 1.76 – 1.74 (m, 1H), 1.59 (s, 7H).

**<sup>13</sup>C NMR** (151 MHz, CDCl<sub>3</sub>) δ 174.2, 155.9, 155.0, 148.7, 135.5, 134.5, 129.8, 129.5, 128.7, 128.3, 118.7, 79.2, 62.6, 60.9, 48.9, 44.0, 34.9, 27.3, 25.9, 25.6.

**HRMS** (ESI) m/z: [M+Na]<sup>+</sup> Calcd for C<sub>26</sub>H<sub>27</sub>N<sub>3</sub>O<sub>5</sub>Cl<sub>2</sub>Na: 554.1220; Found: 554.1220.

**(1*R*,2*S*,5*R*)-2-isopropyl-5-methylcyclohexyl 4-((2-benzyl-3,5-dioxo-2,5-dihydro-1,2,4-triazin-4(3*H*)-yl)methyl)benzoate (1h)**

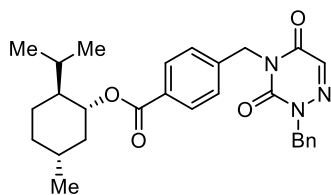

The title compound **1h** was synthesized according to the general procedure (GP-1) using *N*-1-benzyl-6-azauracils (1.0 mmol), (1*R*,2*S*,5*R*)-2-isopropyl-5-methylcyclohexyl 4-(bromomethyl)benzoate (1.0 mmol) and K<sub>2</sub>CO<sub>3</sub> (1.0 mmol) in DMF at room temperature. The product was obtained after silica column chromatography (*n*-hexane : ethyl acetate 4 : 1) as a white solid (80%, 398 mg).

**<sup>1</sup>H NMR** (600 MHz, CDCl<sub>3</sub>) δ 8.03 (d, *J* = 8.1 Hz, 2H), 7.47 – 7.40 (m, 5H), 7.33 – 7.27 (m, 3H), 5.14 (s, 2H), 5.07 (s, 2H), 4.95 – 4.90 (m, 1H), 2.13 – 2.09 (m, 1H), 1.95 – 1.91 (m, 1H), 1.74 – 1.72 (m, 2H), 1.58 – 1.52 (m, 2H), 1.17 – 1.06 (m, 2H), 0.93 – 0.90 (m, 7H), 0.78 (d, *J* = 6.9 Hz, 3H).

**<sup>13</sup>C NMR (151 MHz, CDCl<sub>3</sub>)** δ 165.7, 155.9, 148.8, 140.1, 135.4, 134.9, 130.9, 130.2, 129.5, 128.7, 128.6, 128.3, 75.1, 55.2, 47.4, 44.1, 41.0, 34.4, 31.5, 26.6, 23.7, 22.1, 20.9, 16.6.

**HRMS (ESI)** m/z: [M+Na]<sup>+</sup> Calcd for C<sub>28</sub>H<sub>33</sub>N<sub>3</sub>O<sub>4</sub>Na: 498.2363; Found: 498.2363.

### 2,4-Dibenzyl-6-cyclohexyl-1,2,4-triazine-3,5(2*H*,4*H*)-dione (3)

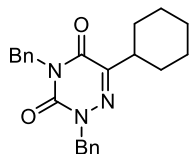

The title compound **6** was synthesized according to the general procedure (GP2), and was obtained after silica column chromatography (*n*-hexane : ethyl acetate 20 : 1) as a colourless solid (76%, 57.1 mg).

**<sup>1</sup>H NMR** (400 MHz, CDCl<sub>3</sub>) δ 7.49 – 7.47 (m, 2H), 7.42 – 7.39 (m, 2H), 7.37 – 7.27 (m, 6H), 5.08 (d, *J* = 3.0 Hz, 4H), 2.90 – 2.84 (m, 1H), 1.88 – 1.71 (m, 5H), 1.42 – 1.15 (m, 5H).

**<sup>13</sup>C NMR** (101 MHz, CDCl<sub>3</sub>) δ 155.8, 149.1, 149.0, 136.0, 135.9, 129.6, 128.9, 128.8, 128.6, 128.2, 128.1, 55.4, 44.3, 38.6, 30.6, 26.3, 26.1.

### 2,4-Dibenzyl-6-cyclobutyl-1,2,4-triazine-3,5(2*H*,4*H*)-dione (4)

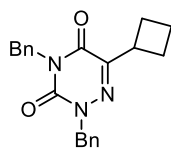

The title compound **6** was synthesized according to the general procedure (GP2), and was obtained after silica column chromatography (*n*-hexane : ethyl acetate 20 : 1) as a colourless solid (43%, 30.0 mg).

**<sup>1</sup>H NMR** (400 MHz, CDCl<sub>3</sub>) δ 7.49 – 7.43 (m, 2H), 7.44 – 7.40 (m, 2H), 7.37 – 7.25 (m, 6H), 5.10 (s, 2H), 5.05 (s, 2H), 3.64 (p, *J* = 8.3 Hz, 1H), 2.27 – 2.18 (m, 4H), 2.07 – 1.95 (m, 1H), 1.88 – 1.79 (m, 1H).

**<sup>13</sup>C NMR** (101 MHz, CDCl<sub>3</sub>) δ 155.8, 149.1, 147.5, 136.0, 135.9, 129.6, 128.9, 128.8, 128.7, 128.3, 128.1, 55.4, 44.2, 35.3, 26.4, 18.4.

### 2,4-Dibenzyl-6-cyclopentyl-1,2,4-triazine-3,5(2*H*,4*H*)-dione (5)

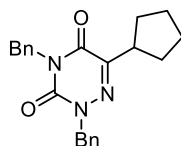



The title compound **5** was synthesized according to the general procedure (GP2), and was obtained after silica column chromatography (*n*-hexane : ethyl acetate 20 : 1) as a colourless solid (63%, 45.5 mg).

**<sup>1</sup>H NMR** (400 MHz, CDCl<sub>3</sub>) δ 7.48 – 7.45 (m, 2H), 7.40 – 7.37 (m, 2H), 7.35 – 7.24 (m, 6H), 5.06 (d, *J* = 2.1 Hz, 4H), 3.29 – 3.22 (m, 1H), 1.95 – 1.90 (m, 2H), 1.70 – 1.60 (m, 6H).

**<sup>13</sup>C NMR** (101 MHz, CDCl<sub>3</sub>) δ 156.1, 149.1, 148.4, 136.0, 135.9, 129.6, 128.9, 128.7, 128.6, 128.2, 128.1, 55.3, 44.2, 40.2, 30.5, 25.4.

#### 2,4-Dibenzyl-6-cycloheptyl-1,2,4-triazine-3,5(2*H*,4*H*)-dione (**6**)

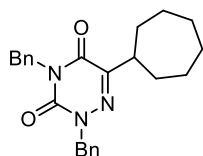

The title compound **7** was synthesized according to the general procedure (GP2), and was obtained after silica column chromatography (*n*-hexane : ethyl acetate 20 : 1) as a colourless solid (62%, 48.2 mg).

**<sup>1</sup>H NMR** (400 MHz, CDCl<sub>3</sub>) δ 7.41 – 7.39 (m, 2H), 7.34 – 7.31 (m, 2H), 7.29 – 7.18 (m, 6H), 4.99 (s, 4H), 3.01 – 2.94 (m, 1H), 1.81 – 1.76 (m, 2H), 1.70 – 1.63 (m, 2H), 1.59 – 1.42 (m, 8H).

**<sup>13</sup>C NMR** (101 MHz, CDCl<sub>3</sub>) δ 155.7, 150.1, 149.0, 136.0, 135.9, 129.5, 128.8, 128.7, 128.6, 128.2, 128.1, 55.3, 44.3, 39.9, 32.3, 28.2, 26.7.

#### 2,4-Dibenzyl-6-butyl-1,2,4-triazine-3,5(2*H*,4*H*)-dione (**7**)

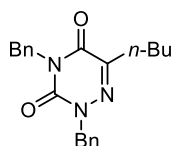

The title compound **8** was synthesized according to the general procedure (GP2), and was obtained after silica column chromatography (*n*-hexane : ethyl acetate 20 : 1) as a colourless solid (61%, 42.6 mg).

**<sup>1</sup>H NMR** (400 MHz, CDCl<sub>3</sub>) δ 7.41 – 7.39 (m, 2H), 7.33 – 7.31 (m, 2H), 7.28 – 7.17 (m, 6H), 5.00 (s, 4H), 2.52 (t, *J* = 7.4 Hz, 2H), 1.52 (p, *J* = 7.4 Hz, 2H), 1.29 (h, *J* = 7.3 Hz, 2H), 0.85 (t, *J* = 7.4 Hz, 3H).

**<sup>13</sup>C NMR** (151 MHz, CDCl<sub>3</sub>) δ 156.2, 149.1, 145.9, 136.1, 135.5, 129.6, 128.8, 128.8, 128.7, 128.3, 128.1, 55.3, 44.3, 30.1, 28.4, 22.4, 13.9.

#### 2,4-Dibenzyl-6-neopentyl-1,2,4-triazine-3,5(2*H*,4*H*)-dione (**8**)

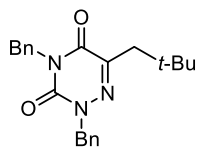

The title compound **9** was synthesized according to the general procedure (GP2), and was obtained after silica column chromatography (*n*-hexane : ethyl acetate 20 : 1) as a colourless solid (14%, 10.1 mg).

**<sup>1</sup>H NMR** (400 MHz, CDCl<sub>3</sub>) δ 7.47 – 7.44 (m, 2H), 7.40 – 7.28 (m, 8H), 5.09 (s, 4H), 2.54 (s, 2H), 0.93 (s, 9H).

**<sup>13</sup>C NMR** (151 MHz, CDCl<sub>3</sub>) δ 156.7, 149.0, 144.6, 135.9, 129.4, 128.9, 128.8, 128.7, 128.3, 128.1, 55.4, 44.2, 42.0, 32.5, 29.6.

### 2,4-Dibenzyl-6-isopropyl-1,2,4-triazine-3,5(2H,4H)-dione (**9**)

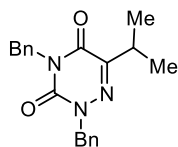

The title compound **10** was synthesized according to the general procedure (GP2), and was obtained after silica column chromatography (*n*-hexane : ethyl acetate 20 : 1) as a colourless solid (73%, 48.9 mg).

**<sup>1</sup>H NMR** (400 MHz, CDCl<sub>3</sub>) δ 7.41 – 7.38 (m, 2H), 7.33 – 7.31 (m, 2H), 7.27 – 7.18 (m, 6H), 4.99 (d, *J* = 2.5 Hz, 4H), 3.09 (p, *J* = 6.8 Hz, 1H), 1.11 (d, *J* = 6.8 Hz, 6H).

**<sup>13</sup>C NMR** (101 MHz, CDCl<sub>3</sub>) δ 155.7, 149.6, 149.0, 136.0, 135.9, 129.6, 128.9, 128.8, 128.6, 128.24, 128.1, 55.3, 44.2, 29.3, 20.1.

### 2,4-Dibenzyl-6-(pentan-3-yl)-1,2,4-triazine-3,5(2H,4H)-dione (**10**)

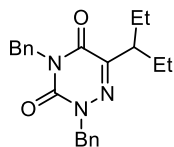

The title compound **11** was synthesized according to the general procedure (GP2), and was obtained after silica column chromatography (*n*-hexane : ethyl acetate 20 : 1) as a colourless solid (51%, 37.0 mg).

**<sup>1</sup>H NMR** (400 MHz, CDCl<sub>3</sub>) δ 7.47 – 7.44 (m, 2H), 7.39 – 7.37 (m, 2H), 7.35 – 7.26 (m, 6H), 5.08 (d, *J* = 5.0 Hz, 4H), 2.91 – 2.84 (m, 1H), 1.74 – 1.53 (m, 4H), 0.81 (t, *J* = 7.5 Hz, 6H).

**<sup>13</sup>C NMR** (101 MHz, CDCl<sub>3</sub>) δ 156.2, 148.9, 147.9, 136.0, 136.0, 129.4, 128.8, 128.7, 128.2, 128.0, 55.3, 44.3, 42.4, 25.0, 11.6.

### 2,4-Dibenzyl-6-(sec-butyl)-1,2,4-triazine-3,5(2*H*,4*H*)-dione (11)

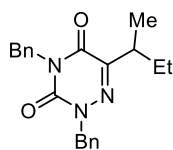

The title compound **11** was synthesized according to the general procedure (GP2), and was obtained after silica column chromatography (*n*-hexane : ethyl acetate 20 : 1) as a colourless solid (77%, 53.8 mg).

**<sup>1</sup>H NMR (400 MHz, CDCl<sub>3</sub>)**  $\delta$  7.47 – 7.45 (m, 2H), 7.40 – 7.38 (m, 2H), 7.35 – 7.26 (m, 6H), 5.11 – 5.03 (m, 4H), 2.99 (q, *J* = 7.0 Hz, 1H), 1.73 (dp, *J* = 14.0, 7.0 Hz, 1H), 1.46 (dp, *J* = 14.5, 7.0 Hz, 1H), 1.15 (d, *J* = 7.0 Hz, 3H), 0.86 (t, *J* = 7.0 Hz, 3H).

**<sup>13</sup>C NMR (101 MHz, CDCl<sub>3</sub>)**  $\delta$  155.9, 149.0, 149.0, 136.0, 136.0, 129.5, 128.8, 128.8, 128.7, 128.2, 128.1, 55.4, 44.3, 35.7, 27.3, 17.6, 11.8.

### *tert*-Butyl 4-(2,4-dibenzyl-3,5-dioxo-2,3,4,5-tetrahydro-1,2,4-triazin-6-yl)piperidine-1-carboxylate (12)

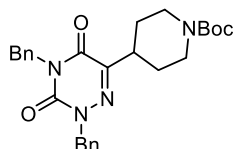

The title compound **12** was synthesized according to the general procedure (GP2) at 3 mA current, and was obtained after silica column chromatography (*n*-hexane : ethyl acetate 20 : 1) as a white solid (64%, 61mg).

**<sup>1</sup>H NMR (600 MHz, CDCl<sub>3</sub>)**  $\delta$  7.50 – 7.45 (m, 2H), 7.42 – 7.37 (m, 2H), 7.37 – 7.26 (m, 6H), 5.07 (s, 4H), 4.49 – 3.92 (m, 2H), 3.00 (tt, *J* = 11.5, 3.3 Hz, 1H), 2.84 – 2.81 (m, 2H), 1.87 – 1.81 (m, 2H), 1.59 – 1.51 (m, 2H), 1.47 (s, 9H).

**<sup>13</sup>C NMR (151 MHz, CDCl<sub>3</sub>)**  $\delta$  155.7, 154.9, 148.8, 147.2, 135.9, 135.7, 129.6, 128.9, 128.84, 128.7, 128.4, 128.2, 79.7, 55.5, 44.4, 36.9, 29.4, 28.6.

### 2-Benzyl-6-cyclohexyl-1,2,4-triazine-3,5(2*H*,4*H*)-dione (13)

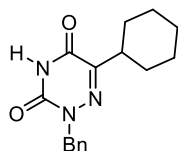

The title compound **13** was synthesized according to the general procedure (GP2), and was obtained after silica column chromatography (*n*-hexane : ethyl acetate 20 : 1) as a colourless solid (68%, 38.8 mg).

**<sup>1</sup>H NMR (400 MHz, CDCl<sub>3</sub>)**  $\delta$  9.86 (s, 1H), 7.49 – 7.45 (m, 2H), 7.32 – 7.24 (m, 3H), 5.07 (s, 2H), 2.88 – 2.81 (m, 1H), 1.86 – 1.69 (m, 5H), 1.35 – 1.24 (m, 5H).

**<sup>13</sup>C NMR (151 MHz, CDCl<sub>3</sub>)** δ 150.0, 135.7, 129.6, 128.7, 128.2, 43.7, 38.5, 30.5, 26.2, 26.1.

**2-Benzyl-6-cyclohexyl-4-(prop-2-yn-1-yl)-1,2,4-triazine-3,5(2*H*,4*H*)-dione (14)**

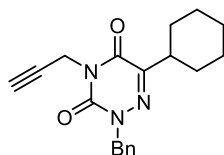

The title compound **14** was synthesized according to the general procedure (GP2), and was obtained after silica column chromatography (*n*-hexane : ethyl acetate 20 : 1) as a colourless solid (29%, 18.7 mg).

**<sup>1</sup>H NMR (400 MHz, CDCl<sub>3</sub>)** δ 7.52 – 7.49 (m, 2H), 7.34 – 7.28 (m, 3H), 5.09 (s, 2H), 4.70 (d, *J* = 2.5 Hz, 2H), 2.89 – 2.86 (m, 1H), 2.33 (t, *J* = 2.5 Hz, 1H), 1.88 – 1.79 (m, 5H), 1.43 – 1.31 (m, 5H).

**<sup>13</sup>C NMR (151 MHz, CDCl<sub>3</sub>)** δ 155.8, 149.8, 148.6, 135.7, 129.8, 129.8, 128.7, 128.2, 77.3, 73.3, 44.4, 41.6, 38.7, 30.5, 26.2, 26.1.

**4-Allyl-2-benzyl-6-cyclohexyl-1,2,4-triazine-3,5(2*H*,4*H*)-dione (15)**

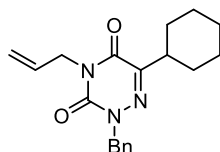

The title compound **15** was synthesized according to the general procedure (GP2), and was obtained after silica column chromatography (*n*-hexane : ethyl acetate 20 : 1) as a colourless solid (35%, 22.8 mg).

**<sup>1</sup>H NMR (600 MHz, CDCl<sub>3</sub>)** δ 7.50 – 7.49 (m, 2H), 7.33 – 7.26 (m, 3H), 5.97 – 5.90 (m, 1H), 5.27 – 5.23 (m, 2H), 5.09 (s, 2H), 4.53 (d, *J* = 5.0 Hz, 2H), 2.90 – 2.85 (m, 1H), 1.86 – 1.79 (m, 4H), 1.73 – 1.70 (m, 1H), 1.39 – 1.34 (m, 4H), 1.26 – 1.20 (m, 1H).

**<sup>13</sup>C NMR (151 MHz, CDCl<sub>3</sub>)** δ 155.8, 149.1, 148.9, 136.0, 131.8, 129.6, 128.7, 128.1, 118.9, 54.1, 44.2, 38.6, 30.5, 26.2, 26.1.

**2-Benzyl-4-cinnamyl-6-cyclohexyl-1,2,4-triazine-3,5(2*H*,4*H*)-dione (16)**

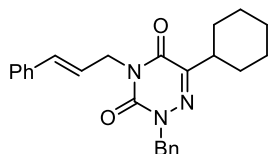

The title compound **16** was synthesized according to the general procedure (GP2), and was obtained after silica column chromatography (*n*-hexane : ethyl acetate 20 : 1) as a colourless solid (76%, 61.0 mg).

**<sup>1</sup>H NMR (400 MHz, CDCl<sub>3</sub>)** δ 7.50 – 7.48 (m, 2H), 7.37 – 7.23 (m, 8H), 6.63 (d, *J* = 16.0 Hz, 1H), 6.32 – 6.25 (m, 1H), 5.08 (s, 2H), 4.67 (d, *J* = 7.0 Hz, 2H), 2.89 – 2.85 (m, 1H), 1.86 – 1.69 (m, 5H), 1.41 – 1.30 (m, 4H), 1.25 – 1.19 (m, 1H).

**<sup>13</sup>C NMR (151 MHz, CDCl<sub>3</sub>)** δ 155.9, 149.2, 148.9, 136.4, 136.0, 134.6, 129.7, 128.7, 128.7, 128.1, 126.7, 122.8, 53.8, 44.3, 38.7, 30.5, 26.3, 26.1.

**HRMS** (EI, *m/z*) calcd for C<sub>25</sub>H<sub>27</sub>N<sub>3</sub>O<sub>2</sub> [M]<sup>+</sup>: 401.2103, found; 401.2098.

## 2-Benzyl-4-butyl-6-cyclohexyl-1,2,4-triazine-3,5(2*H*,4*H*)-dione (17)

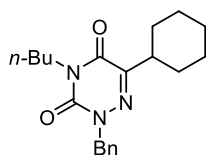

The title compound **17** was synthesized according to the general procedure (GP2), and was obtained after silica column chromatography (*n*-hexane : ethyl acetate 20 : 1) as a colourless solid (57%, 38.9 mg).

**<sup>1</sup>H NMR (600 MHz, CDCl<sub>3</sub>)** δ 7.50 – 7.48 (m, 2H), 7.32 – 7.26 (m, 3H), 5.09 (s, 2H), 3.93 (t, *J* = 7.0 Hz, 2H), 2.90 – 2.85 (m, 1H), 1.86 – 1.80 (m, 4H), 1.73 – 1.68 (m, 3H), 1.39 – 1.33 (m, 6H), 1.26 – 1.20 (m, 1H), 0.94 (t, *J* = 6.0 Hz, 3H).

**<sup>13</sup>C NMR (151 MHz, CDCl<sub>3</sub>)** δ 155.9, 149.0, 148.6, 136.1, 129.6, 128.6, 128.1, 51.4, 44.2, 38.5, 30.6, 30.3, 26.3, 26.1, 19.8, 13.8.

**HRMS** (EI, *m/z*) calcd for C<sub>20</sub>H<sub>27</sub>N<sub>3</sub>O<sub>2</sub> [M]<sup>+</sup>: 341.2103, found; 341.2098.

## 2-Benzyl-6-cyclohexyl-4-(cyclopropylmethyl)-1,2,4-triazine-3,5(2*H*,4*H*)-dione (18)

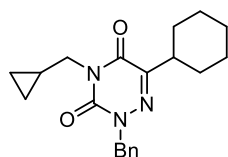

The title compound **18** was synthesized according to the general procedure (GP2), and was obtained after silica column chromatography (*n*-hexane : ethyl acetate 20 : 1) as a colourless solid (62%, 42.1 mg).

**<sup>1</sup>H NMR (400 MHz, CDCl<sub>3</sub>)** δ 7.51 – 7.48 (m, 2H), 7.32 – 7.24 (m, 3H), 5.08 (s, 2H), 3.78 (d, *J* = 7.0 Hz, 2H), 2.89 – 2.83 (m, 1H), 1.87 – 1.69 (m, 5H), 1.38 – 1.31 (m, 4H), 1.24 – 1.19 (m, 2H), 0.51 – 0.48 (m, 2H), 0.38 – 0.34 (m, 2H).

**<sup>13</sup>C NMR (151 MHz, CDCl<sub>3</sub>)** δ 155.9, 149.1, 148.6, 136.1, 129.7, 128.6, 128.1, 56.4, 44.2, 38.4, 30.6, 26.3, 26.1, 10.1, 3.6.

**HRMS** (EI, *m/z*) calcd for C<sub>20</sub>H<sub>25</sub>N<sub>3</sub>O<sub>2</sub> [M]<sup>+</sup>: 339.1947, found; 339.1941.

**Methyl 2-(2-benzyl-6-cyclohexyl-3,5-dioxo-2,5-dihydro-1,2,4-triazin-4(3H)-yl)acetate (19)**

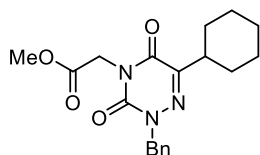

The title compound **19** was synthesized according to the general procedure (GP2), and was obtained after silica column chromatography (*n*-hexane : ethyl acetate 20 : 1) as a colourless solid (94%, 67.2 mg).

**<sup>1</sup>H NMR (400 MHz, CDCl<sub>3</sub>)** δ 7.46 – 7.43 (m, 2H), 7.31 – 7.25 (m, 3H), 5.07 (s, 2H), 4.65 (s, 2H), 3.76 (s, 3H), 2.89 – 2.82 (m, 1H), 1.86 – 1.67 (m, 5H), 1.36– 1.24 (m, 5H);

**<sup>13</sup>C NMR (151 MHz, CDCl<sub>3</sub>)** δ 168.1, 155.7, 149.7, 149.2, 135.7, 129.4, 128.7, 128.1, 52.8, 52.7, 44.3, 38.6, 30.4, 26.2, 26.0.

**HRMS** (EI, *m/z*) calcd for C<sub>19</sub>H<sub>23</sub>N<sub>3</sub>O<sub>4</sub> [M]<sup>+</sup>: 357.1688, found; 357.1682.

**1-Benzyl-3-cyclohexylquinoxalin-2(1H)-one (20)**

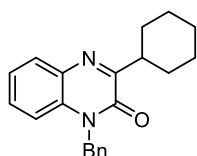

The title compound **20** was synthesized according to the general procedure (GP2), and was obtained after silica column chromatography (*n*-hexane : ethyl acetate 20 : 1) as a colourless solid (76%, 48.4 mg).

**<sup>1</sup>H NMR (400 MHz, CDCl<sub>3</sub>)** δ 7.83 (dd, *J* = 8.0, 1.5 Hz, 1H), 7.38 – 7.34 (m, 1H), 7.31 – 7.22 (m, 7H), 5.47 (s, 2H), 3.39 (tt, *J* = 12.5, 3.0 Hz, 1H), 2.00 (d, *J* = 10.0 Hz, 2H), 1.89 – 1.85 (m, 2H), 1.76 (d, *J* = 13.0 Hz, 1H), 1.65 – 1.55 (m, 2H), 1.52 – 1.41 (m, 2H), 1.33 (tt, *J* = 12.5, 3.0 Hz, 1H).

**<sup>13</sup>C NMR (151 MHz, CDCl<sub>3</sub>)** δ 164.5, 154.7, 135.6, 133.3, 132.3, 130.0, 129.5, 129.0, 127.7, 127.1, 123.6, 114.4, 46.1, 41.0, 30.7, 26.5, 26.3.

**1-Benzyl-3-cyclohexyl-5,6-diphenylpyrazin-2(1H)-one (21)**

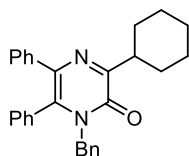

The title compound **21** was synthesized according to the general procedure (GP2), and was obtained after silica column chromatography (*n*-hexane : ethyl acetate 20 : 1) as a colourless solid (40%, 33.6 mg).

**<sup>1</sup>H NMR (600 MHz, CDCl<sub>3</sub>)** δ 7.51 (d, *J* = 7.5 Hz, 2H), 7.45 – 7.40 (m, 6H), 7.36 – 7.34 (m, 1H), 7.30 – 7.26 (m, 6H), 5.53 (s, 2H), 3.16 (tt, *J* = 12.0, 3.5 Hz, 1H), 1.98 (d, *J* = 12.0 Hz, 2H), 1.90 – 1.87 (m, 2H), 1.79 – 1.74 (m, 3H), 1.49 – 1.42 (m, 2H), 1.36 – 1.31 (m, 1H).

**<sup>13</sup>C NMR (151 MHz, CDCl<sub>3</sub>)** δ 155.2, 148.6, 145.2, 143.5, 139.4, 139.1, 137.6, 130.0, 130.0, 128.6, 128.1, 128.1, 127.9, 127.6, 67.8, 39.9, 30.8, 26.6, 26.3.

**3-(2-Benzyl-6-cyclohexyl-3,5-dioxo-2,5-dihydro-1,2,4-triazin-4(3*H*)-yl)propyl 2-(11-oxo-6,11-dihydrodibenzo[*b,e*]oxepin-2-yl)acetate (**22**)**

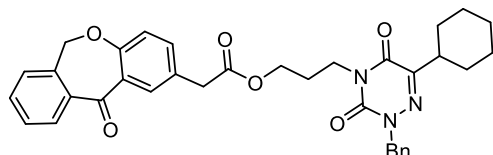

The title compound **22** was synthesized according to the general procedure (GP2), and was obtained after silica column chromatography (*n*-hexane : ethyl acetate 20 : 1) as a colourless solid (34%, 40.4 mg).

**<sup>1</sup>H NMR (400 MHz, CDCl<sub>3</sub>)** δ 8.09 (s, 1H), 7.86 (d, *J* = 7.5 Hz, 1H), 7.54 (t, *J* = 7.5 Hz, 1H), 7.47 – 7.24 (m, 8H), 7.01 (dd, *J* = 8.0, 2.0 Hz, 1H), 5.16 (s, 2H), 5.05 (s, 2H), 4.15 – 4.12 (m, 2H), 4.03 – 3.99 (m, 2H), 3.58 (s, 2H), 2.86 – 2.81 (m, 1H), 2.09 – 2.05 (m, 2H), 1.82 – 1.74 (m, 4H), 1.69 – 1.62 (m, 2H), 1.34 – 1.24 (m, 4H).

**<sup>13</sup>C NMR (151 MHz, CDCl<sub>3</sub>)** δ 190.9, 171.4, 160.6, 155.7, 149.1, 149.0, 140.6, 136.5, 135.9, 135.7, 132.9, 132.6, 129.7, 129.6, 129.4, 128.7, 128.1, 127.9, 127.8, 125.3, 121.2, 73.7, 62.2, 48.5, 44.3, 40.2, 38.5, 30.5, 27.4, 26.2, 26.1.

**HRMS (ESI, *m/z*)** calcd for C<sub>35</sub>H<sub>35</sub>N<sub>3</sub>O<sub>6</sub>Na [*M*+Na]<sup>+</sup>: 616.2424, found; 616.2423.

**(1*R*,2*S*,5*R*)-2-Isopropyl-5-methylcyclohexyl 4-((2-benzyl-6-cyclohexyl-3,5-dioxo-2,5-dihydro-1,2,4-triazin-4(3*H*)-yl)methyl)benzoate (**23**)**

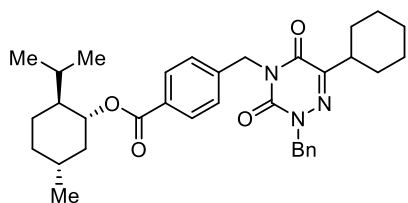

The title compound **23** was synthesized according to the general procedure (GP2), and was obtained after silica column chromatography (*n*-hexane : ethyl acetate 20 : 1) as a colourless solid (37%, 41.3 mg).

**<sup>1</sup>H NMR (400 MHz, CDCl<sub>3</sub>)** δ 8.02 (d, *J* = 8.0 Hz, 2H), 7.48 – 7.43 (m, 4H), 7.33 – 7.27 (m, 3H), 5.12 (d, *J* = 3.0 Hz, 2H), 5.06 (s, 2H), 4.95 – 4.89 (m, 1H), 2.89 – 2.84 (m, 1H), 2.11 (d, *J* = 11.0 Hz, 1H), 1.96 – 1.90 (m, 1H), 1.87 – 1.80 (m, 4H), 1.74 – 1.70 (m, 3H), 1.60 – 1.51 (m, 3H), 1.37 – 1.34 (m, 5H), 1.15 – 1.07 (m, 2H), 0.92 (t, *J* = 7.0 Hz, 6H), 0.78 (d, *J* = 7.0 Hz, 3H).

**<sup>13</sup>C NMR (101 MHz, CDCl<sub>3</sub>)** δ 165.9, 155.7, 149.5, 149.0, 140.7, 135.9, 130.8, 130.1, 129.6, 128.7, 128.6, 128.2, 75.1, 55.0, 47.4, 44.4, 41.1, 38.6, 34.5, 31.6, 30.6, 26.7, 26.2, 26.1, 23.8, 22.2, 20.9, 16.7.

**HRMS** (ESI, m/z) calcd for C<sub>34</sub>H<sub>43</sub>N<sub>3</sub>O<sub>4</sub>Na [M+Na]<sup>+</sup>: 580.3151, found; 580.3143.

**(1R,2S,4R)-4,7,7-trimethylbicyclo[2.2.1]heptan-2-yl 4-((2-benzyl-6-cyclohexyl-3,5-dioxo-2,5-dihydro-1,2,4-triazin-4(3H)-yl)methyl)benzoate (24)**

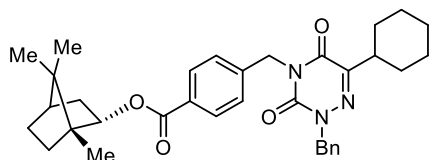

The title compound **24** was synthesized according to the general procedure (GP2), and was obtained after silica column chromatography (*n*-hexane : ethyl acetate 20 : 1) as a colourless solid (41%, 45.6 mg).

**<sup>1</sup>H NMR (400 MHz, CDCl<sub>3</sub>)** δ 8.02 (d, *J* = 8.0 Hz, 2H), 7.46 – 7.43 (m, 4H), 7.31 – 7.24 (m, 3H), 5.11 – 5.07 (m, 3H), 5.05 (s, 2H), 2.88 – 2.83 (m, 1H), 2.49 – 2.41 (m, 1H), 2.13 – 2.06 (m, 1H), 1.86 – 1.78 (m, 5H), 1.76 – 1.69 (m, 2H), 1.41 – 1.31 (m, 5H), 1.28 – 1.24 (m, 2H), 1.08 (dd, *J* = 14.0, 3.0 Hz, 1H), 0.95 (s, 3H), 0.89 (d, *J* = 5.0 Hz, 3H).

**<sup>13</sup>C NMR (101 MHz, CDCl<sub>3</sub>)** δ 166.6, 155.7, 149.5, 149.0, 140.8, 135.9, 130.8, 130.1, 129.6, 128.7, 128.6, 128.2, 80.8, 55.0, 49.2, 48.0, 45.1, 44.3, 38.6, 37.0, 30.6, 28.2, 27.5, 26.2, 26.09, 19.85, 19.05, 13.73.

**HRMS** (ESI, m/z) calcd for C<sub>34</sub>H<sub>41</sub>N<sub>3</sub>O<sub>4</sub>Na [M+Na]<sup>+</sup>: 578.2995, found; 579.2986.

**3-(2-Benzyl-6-cyclohexyl-3,5-dioxo-2,5-dihydro-1,2,4-triazin-4(3H)-yl)propyl 2-(4-(2,2-dichlorocyclopropyl)phenoxy)-2-methylpropanoate (25)**

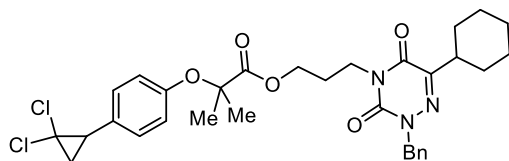

The title compound **25** was synthesized according to the general procedure (GP2), and was obtained after silica column chromatography (*n*-hexane : ethyl acetate 20 : 1) as a colourless solid (58%, 61.7 mg).

**<sup>1</sup>H NMR (400 MHz, CDCl<sub>3</sub>)** δ 7.46 (d, *J* = 7.5 Hz, 2H), 7.31 – 7.25 (m, 3H), 7.09 (d, *J* = 8.0 Hz, 2H), 6.80 (d, *J* = 11.0 Hz, 2H), 5.04 (s, 2H), 4.19 (t, *J* = 6.0 Hz, 2H), 3.88 (t, *J* = 7.0 Hz, 2H), 2.86 – 2.77 (m, 2H), 2.03 (p, *J* = 6.5 Hz, 2H), 1.90 (dd, *J* = 11.0, 7.0 Hz, 1H), 1.84 – 1.71 (m, 6H), 1.58 (s, 6H), 1.36 – 1.24 (m, 5H).



$^{13}\text{C}$  NMR (151 MHz,  $\text{CDCl}_3$ )  $\delta$  174.2, 155.7, 155.0, 149.1, 148.9, 135.9, 129.8, 129.6, 128.7, 128.3, 128.1, 118.8, 79.3, 62.7, 61.0, 48.3, 44.2, 38.5, 34.9, 30.5, 27.4, 26.2, 26.1, 25.9, 25.6, 25.5.

HRMS (ESI,  $m/z$ ) calcd for  $\text{C}_{32}\text{H}_{37}\text{Cl}_2\text{N}_3\text{O}_5\text{Na}$   $[\text{M}+\text{Na}]^+$ : 636.2008, found; 636.1998.

### Procedure for the electro-catalysed *N*-alkylation reaction

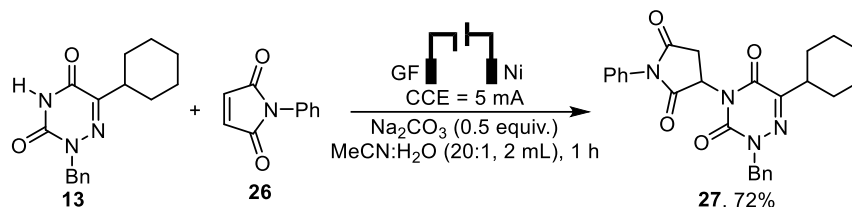

To a 10 mL test tube equipped with a magnetic stir bar was added 2-Benzyl-6-cyclohexyl-1,2,4-triazine-3,5(2*H*,4*H*)-dione (**13**) (0.029 g, 0.1 mmol), *N*-phenylmaleimide (0.1 mmol, 1.0 equiv.),  $\text{Na}_2\text{CO}_3$  (0.05 mmol, 0.5 equiv.) and MeCN: $\text{H}_2\text{O}$  (20:1, 2.0 mL). The reaction mixture was subjected to constant current electrolysis at 5 mA for 1 hour using graphite (anode) and nickel (cathode) electrodes. The solvent was evaporated on rotatory evaporator and the product was purified by silica gel column chromatography using *n*-hexane : EtOAc (10:1) as eluent to yield **27** as a white solid (32.9 mg, 72%).

### 2-Benzyl-6-cyclohexyl-4-(2,5-dioxo-1-phenylpyrrolidin-3-yl)-1,2,4-triazine-3,5(2*H*,4*H*)-dione (**27**)

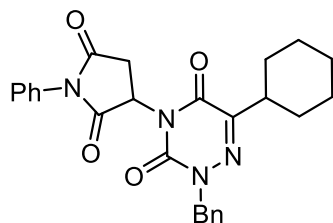

$^1\text{H}$  NMR (600 MHz,  $\text{CDCl}_3$ )  $\delta$  7.52 – 7.48 (m, 4H), 7.45 – 7.42 (m, 1H), 7.35 – 7.29 (m, 5H), 5.62 (s, 1H), 5.12 – 5.07 (m, 2H), 3.31 (dd,  $J$  = 18.0, 9.5 Hz, 1H), 3.10 (dd,  $J$  = 18.0, 5.5 Hz, 1H), 2.91 – 2.86 (m, 1H), 1.88 (t,  $J$  = 14.0 Hz, 2H), 1.82 – 1.79 (m, 2H), 1.74 – 1.71 (m, 1H), 1.38 – 1.26 (m, 5H).

$^{13}\text{C}$  NMR (151 MHz,  $\text{CDCl}_3$ )  $\delta$  172.9, 172.2, 155.3, 151.0, 148.9, 135.3, 131.6, 129.7, 129.5, 129.2, 128.8, 128.4, 126.6, 44.6, 38.8, 34.1, 30.4, 30.4, 26.1, 26.0.

HRMS (EI,  $m/z$ ) calcd for  $\text{C}_{26}\text{H}_{26}\text{N}_4\text{O}_4$   $[\text{M}]^+$ : 458.1954, found; 458.1948.

### Procedure for the photochemical *N*-H insertion reaction

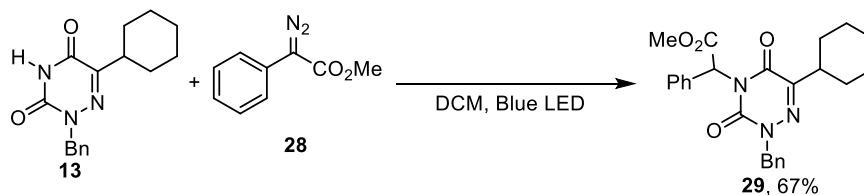

Prepared according to the literature report.<sup>2</sup> To a 10 mL test tube equipped with a magnetic stir bar was added substrate **13** (0.029 g, 0.1 mmol) and DCM (2.0 mL). Then, phenyl diazoester **28** (0.035 g, 0.2 mmol, 2.0 equiv.), was added and the resulting mixture was irradiated with a 12 W (440 nm) blue LEDs at a distance of ca. 1.5 cm (with cooling by the fan) for 2 h. After finishing the reaction, the product was purified by silica gel column chromatography using *n*-hexane : EtOAc (20:1 to 10:1) as eluent to yield **29** as a colourless wax (29.1 mg, 67%).

**Methyl 2-(2-benzyl-6-cyclohexyl-3,5-dioxo-2,5-dihydro-1,2,4-triazin-4(3*H*)-yl)-2-phenylacetate (**29**)**

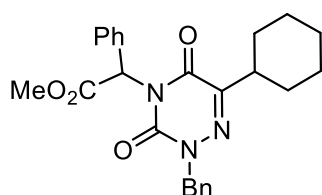

<sup>1</sup>H NMR (400 MHz, CDCl<sub>3</sub>) δ 7.49 – 7.42 (m, 4H), 7.39 – 7.38 (m, 3H), 7.33 – 7.28 (m, 3H), 6.40 (s, 1H), 5.08 (s, 2H), 3.77 (s, 3H), 2.83 (t, *J* = 11.5 Hz, 1H), 1.91 (d, *J* = 12.5 Hz, 1H), 1.73 (q, *J* = 17.0 Hz, 4H), 1.40 – 1.14 (m, 5H).

<sup>13</sup>C NMR (151 MHz, CDCl<sub>3</sub>) δ 169.2, 155.4, 149.3, 149.0, 135.7, 133.4, 130.3, 129.6, 129.2, 128.7, 128.6, 128.2, 64.5, 53.0, 44.5, 38.6, 30.6, 30.3, 26.1, 26.1, 26.1.

HRMS (ESI, *m/z*) calcd for C<sub>25</sub>H<sub>27</sub>N<sub>3</sub>O<sub>4</sub>Na [M+Na]<sup>+</sup>: 456.1899, found; 456.1891.

**Procedure for scale up reaction**

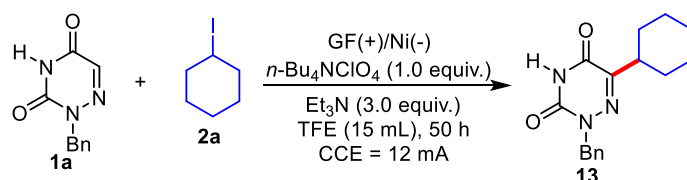

A dry 50 mL RB equipped with a teflon-coated magnetic stir bar was charged with azauracil **1a** (2.0 mmol) and tetrabutylammonium perchlorate (2.0 mmol) followed by addition of trifluoroethanol (15 mL). Then alkyl iodide **2a** (2.0 equiv.) and triethylamine (3.0 equiv.) was added sequentially and electrolyzed at a constant current of 12 mA. After complete conversion (in 50 hours) of the substrate **1a** (indicated by TLC), the electrodes were taken out and washed twice by sonicating in dichloromethane for 5 min. The solvents were combined and concentrated on a rotatory evaporator. The crude mixture was then purified *via* silica gel column chromatography using a mixture of *n*-hexane : ethyl acetate as eluent to provide the product **13** (308.2 mg, 54%).

## 5. Radical Quenching Experiment

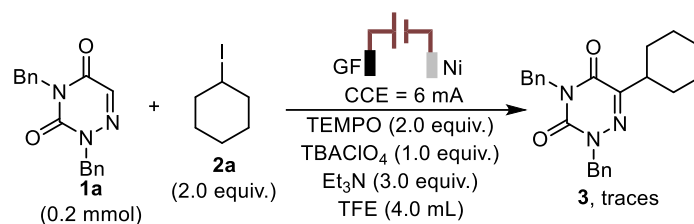

A dry 10 mL vial equipped with a teflon-coated magnetic stir bar was charged with azauracil **1a** (0.2 mmol), TEMPO (0.4 mmol, 2.0 equiv.) and tetrabutylammonium perchlorate (0.2 mmol, 1.0 equiv.) followed by addition of trifluoroethanol (4.0 mL). Then alkyl iodide **2a** (2.0 equiv.) and triethylamine (3.0 equiv.) was added sequentially and electrolyzed at a constant current of 6 mA. After electrolyzing the reaction for 22 hours the product was formed only in trace amount.

## 6. References

1. (a) K. Sun, A. Shi, Y. Liu, X. Chen, P. Xiang, X. Wang, L. Qua, B. Yu, *Chem. Sci.*, 2022, **13**, 5659; (b) R. K. Samanta, P. Meher and S. Murarka, *J. Org. Chem.*, 2022, **87**, 10947.
2. S. K. Hota and S. Murarka, *Chem. Asian J.*, 2024, **19**, e202301027.

## 7. NMR Spectra

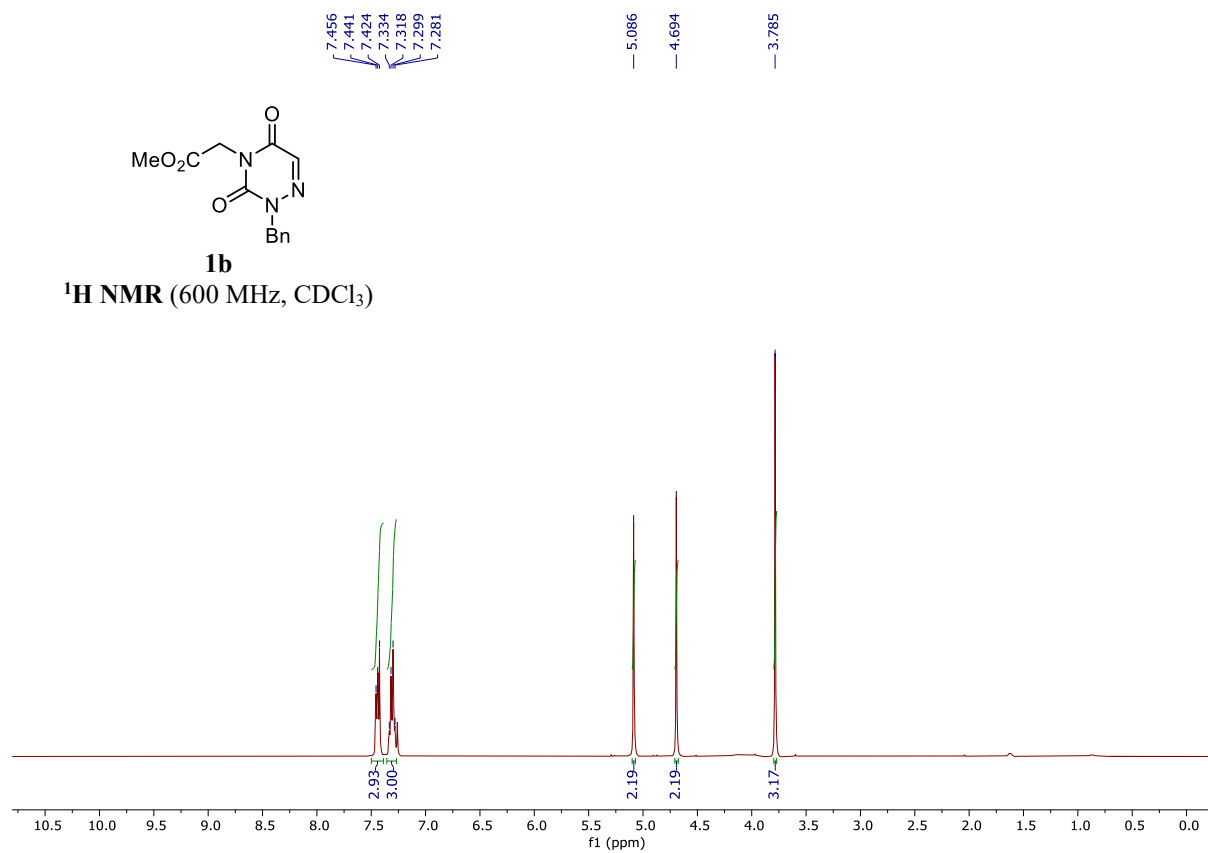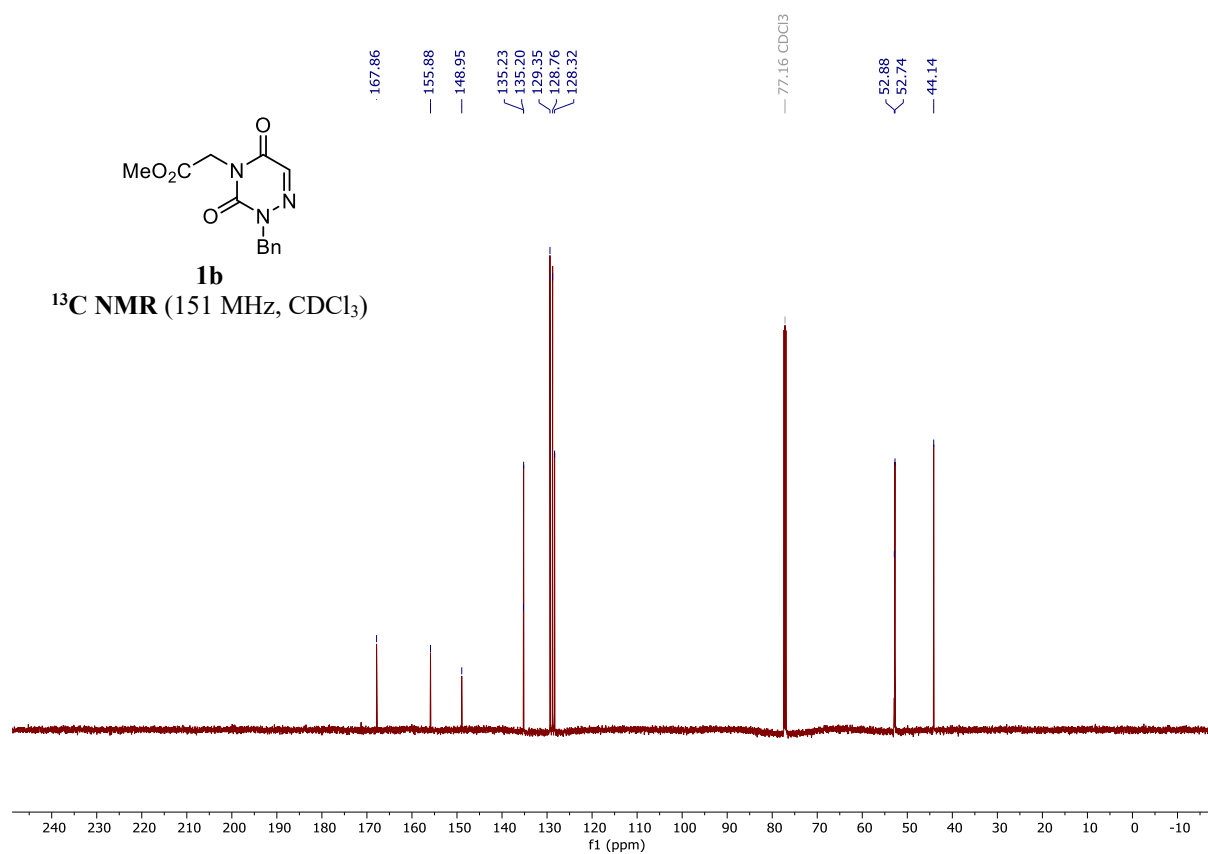

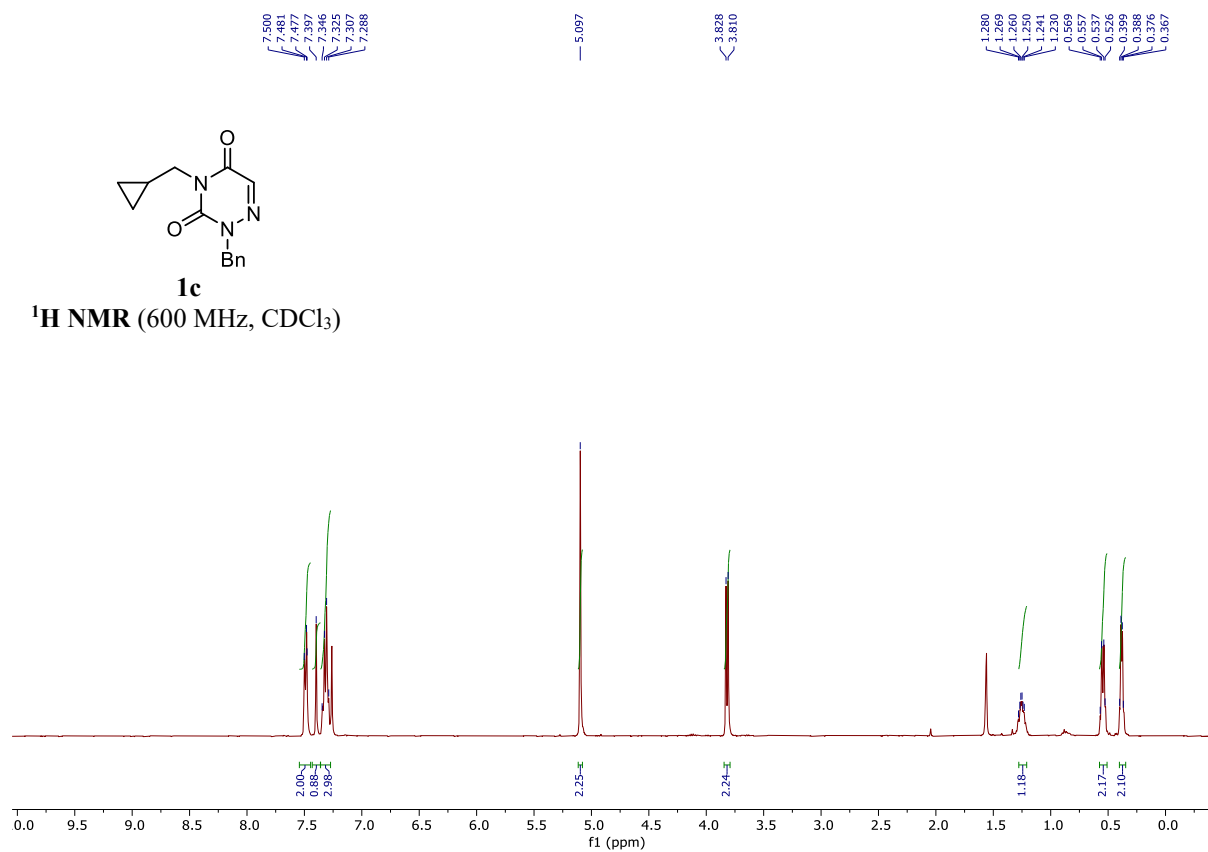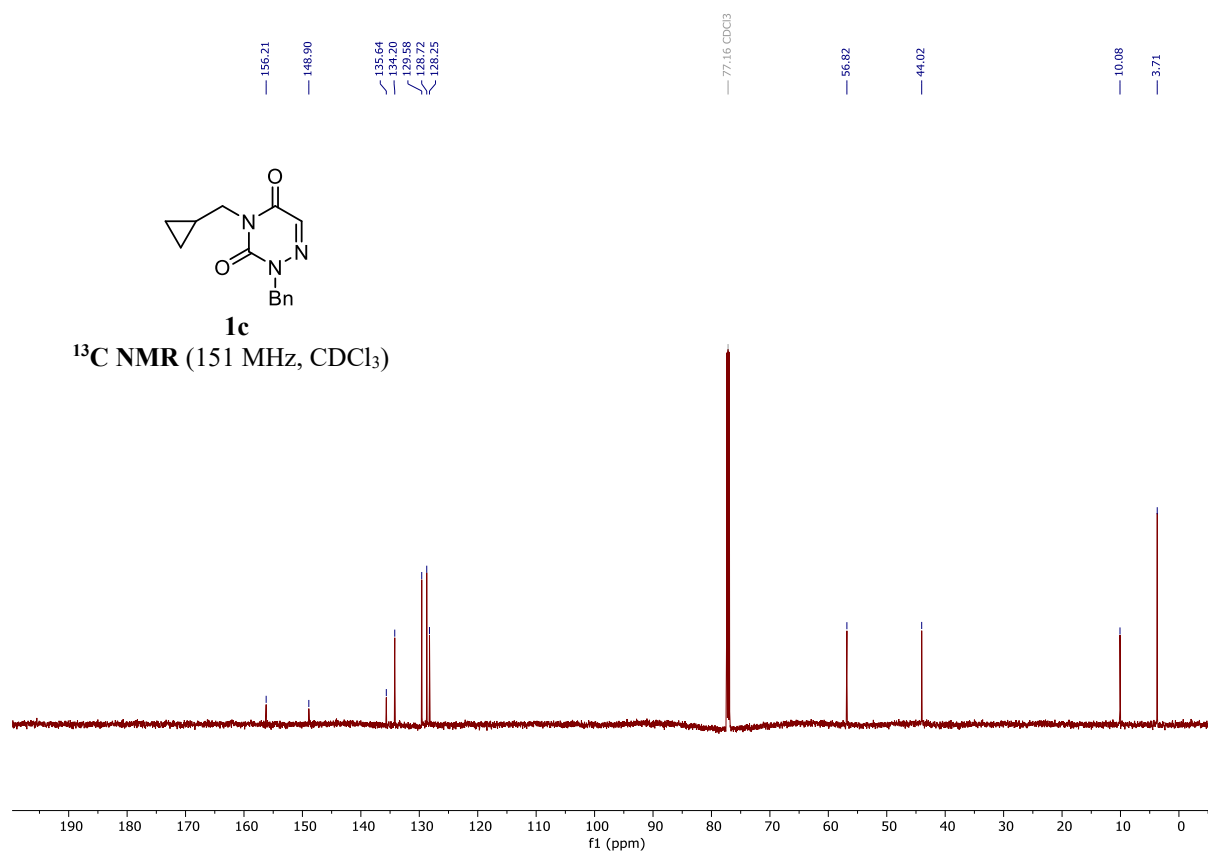

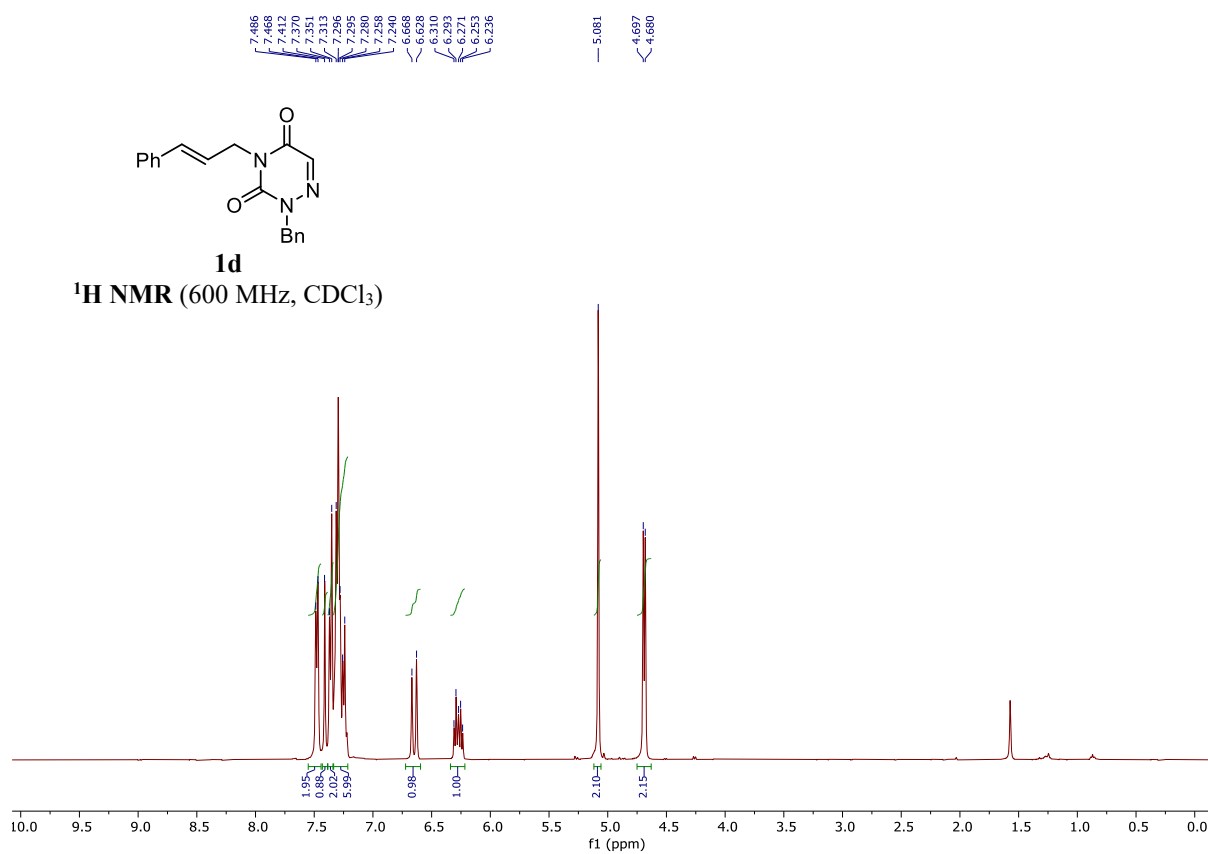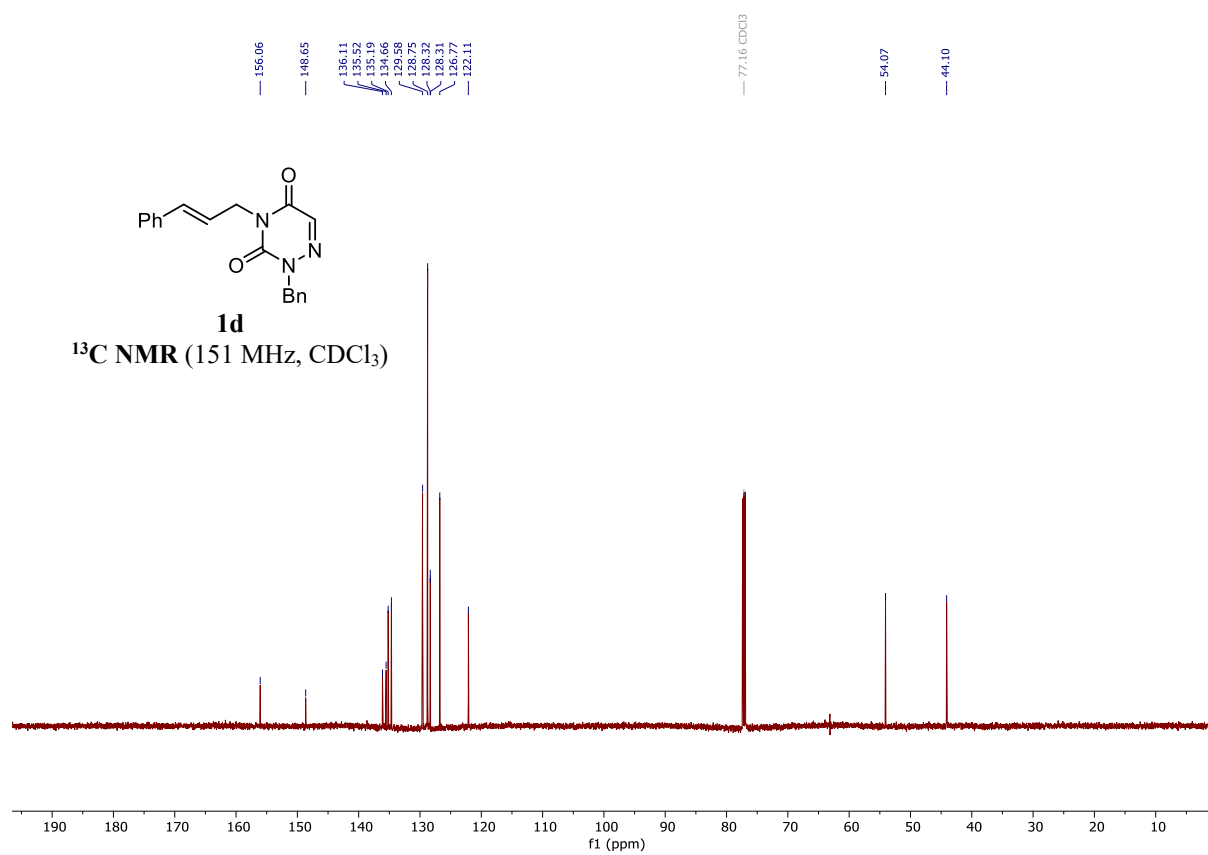

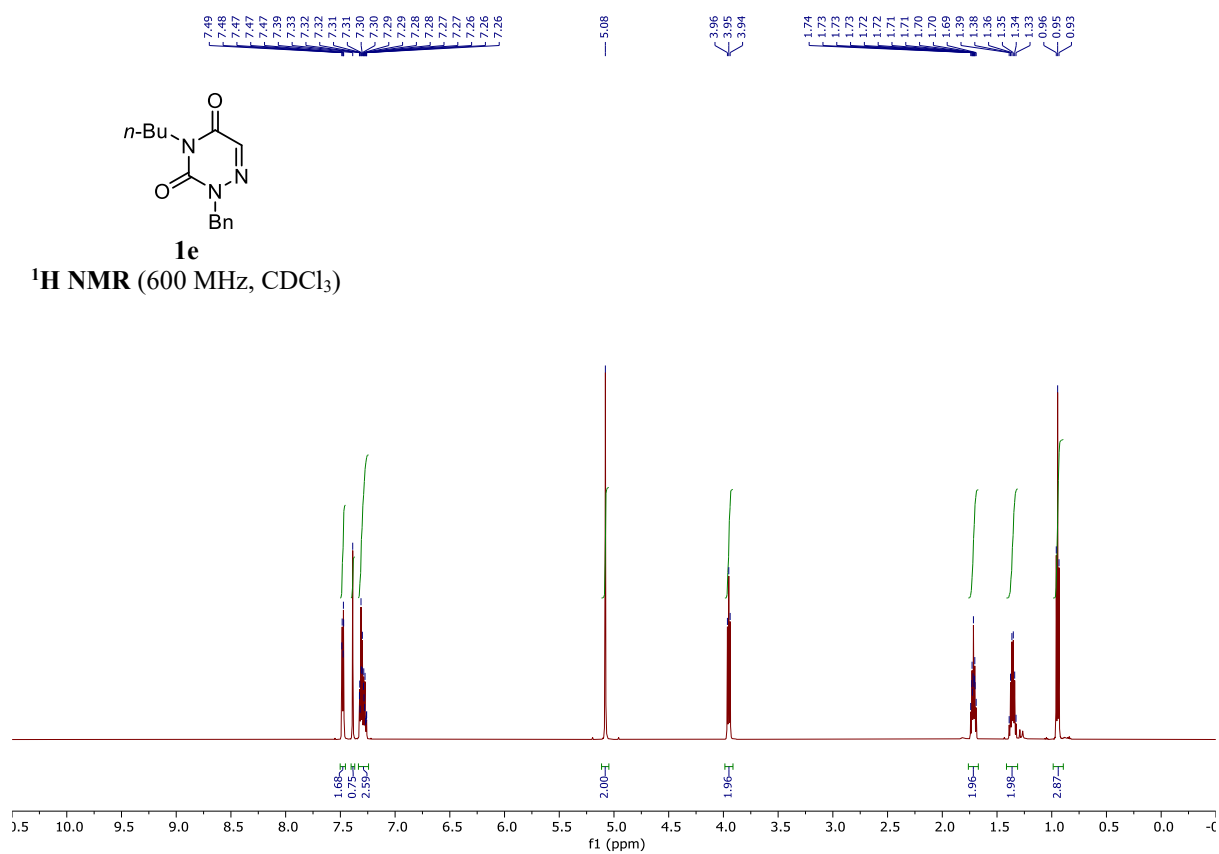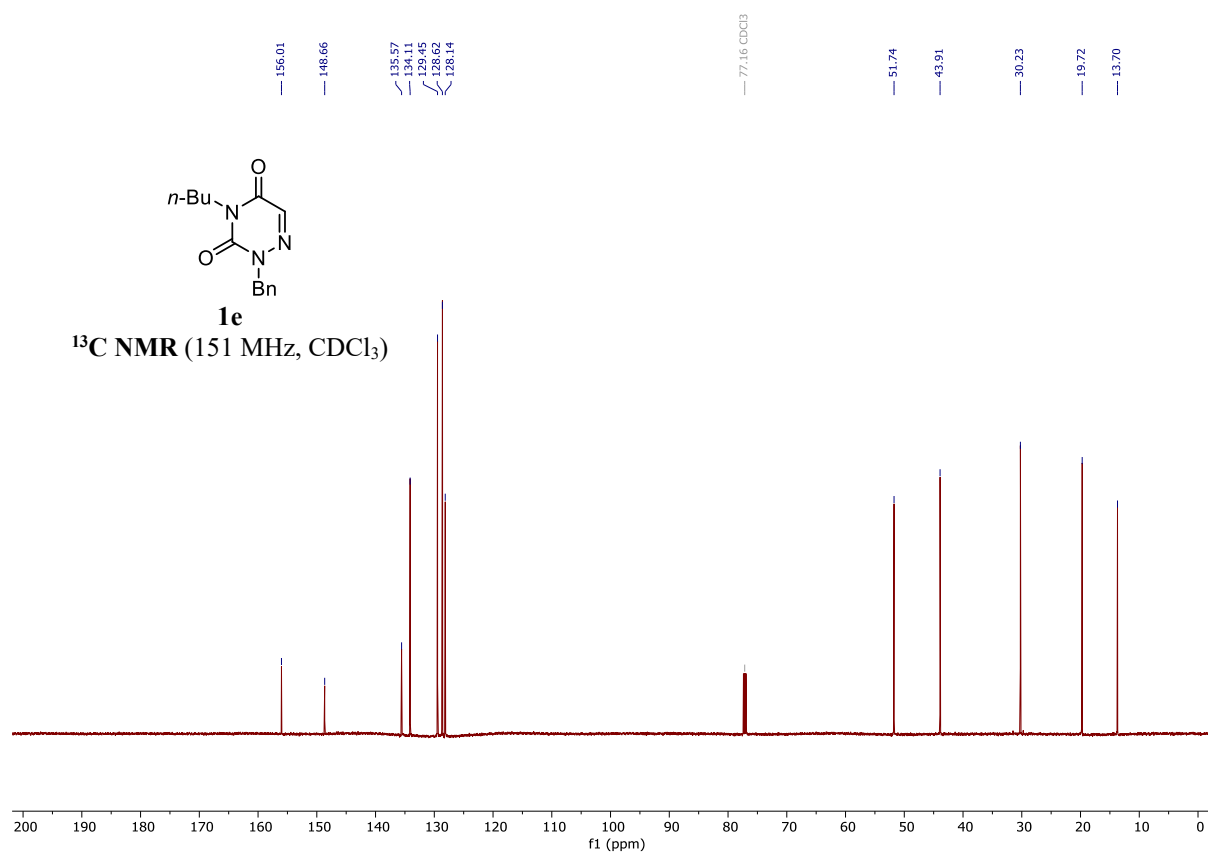

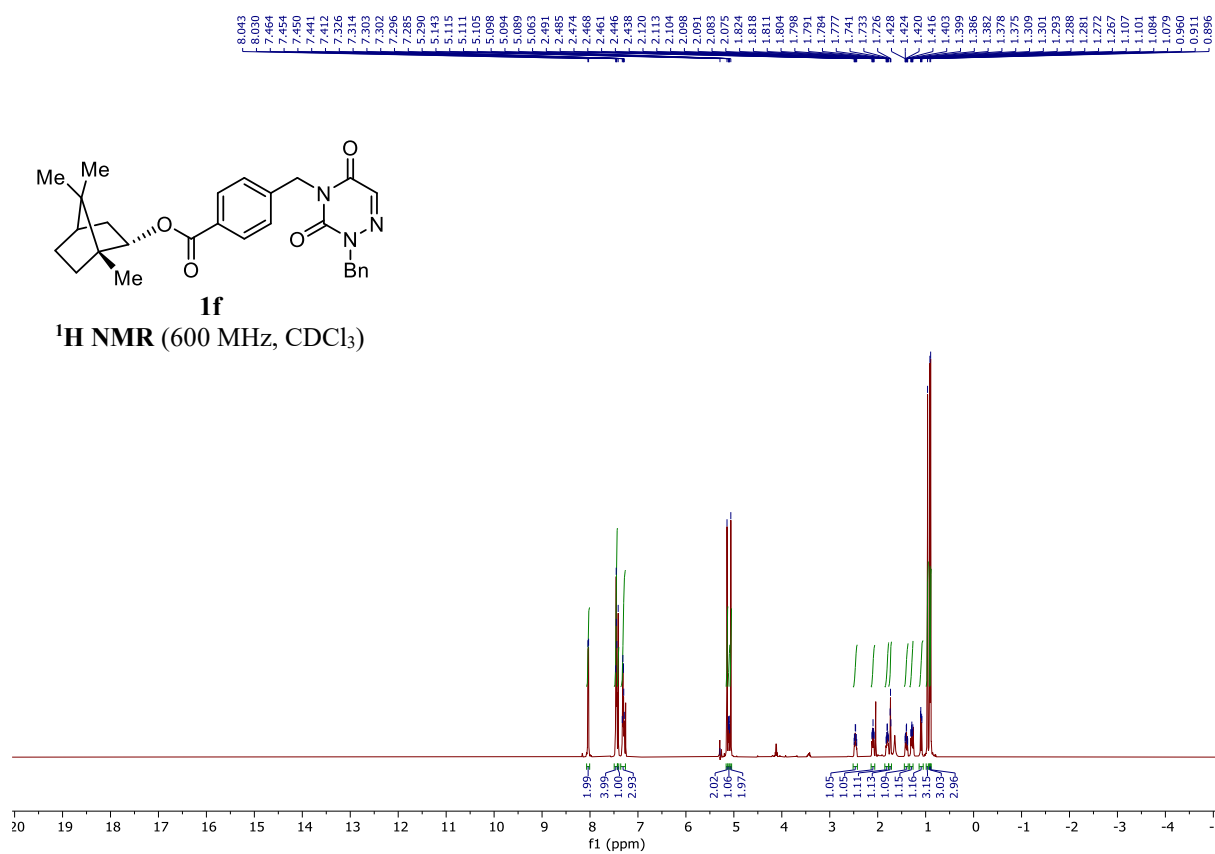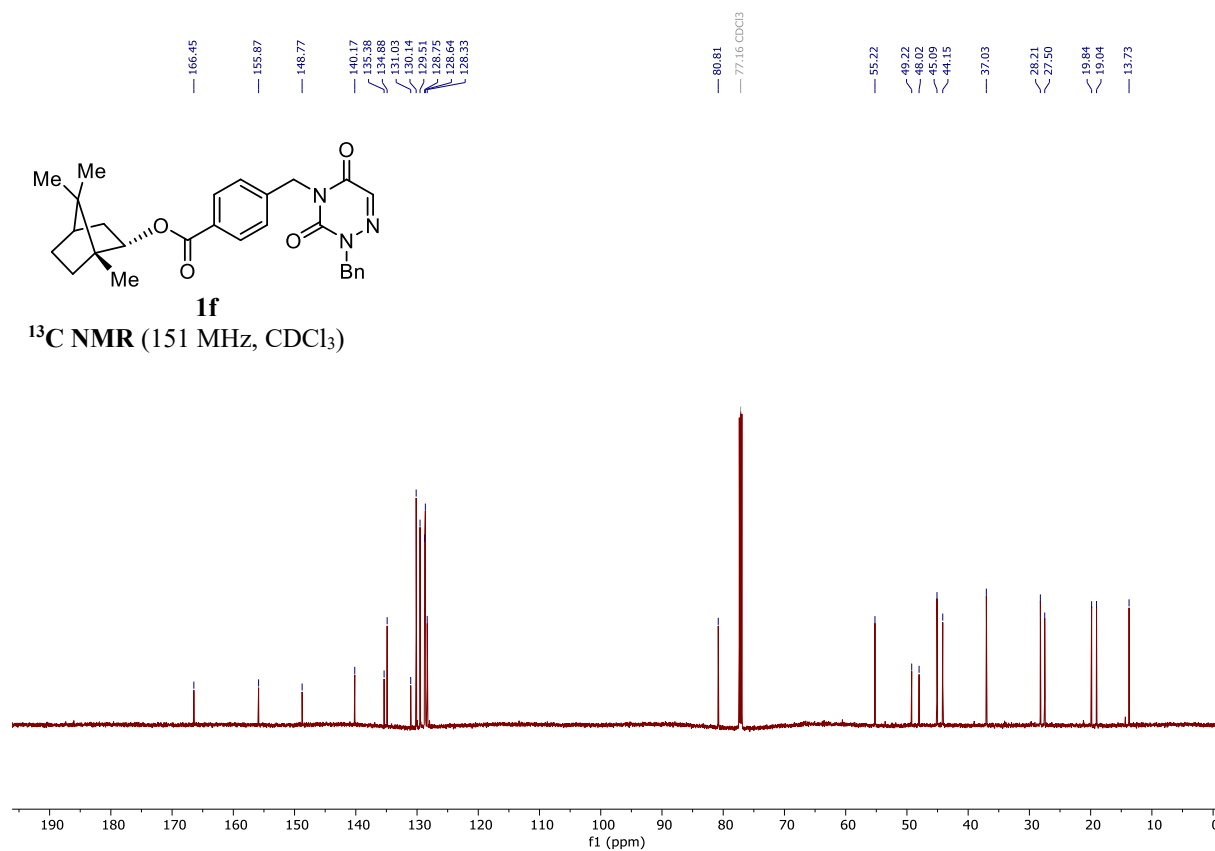



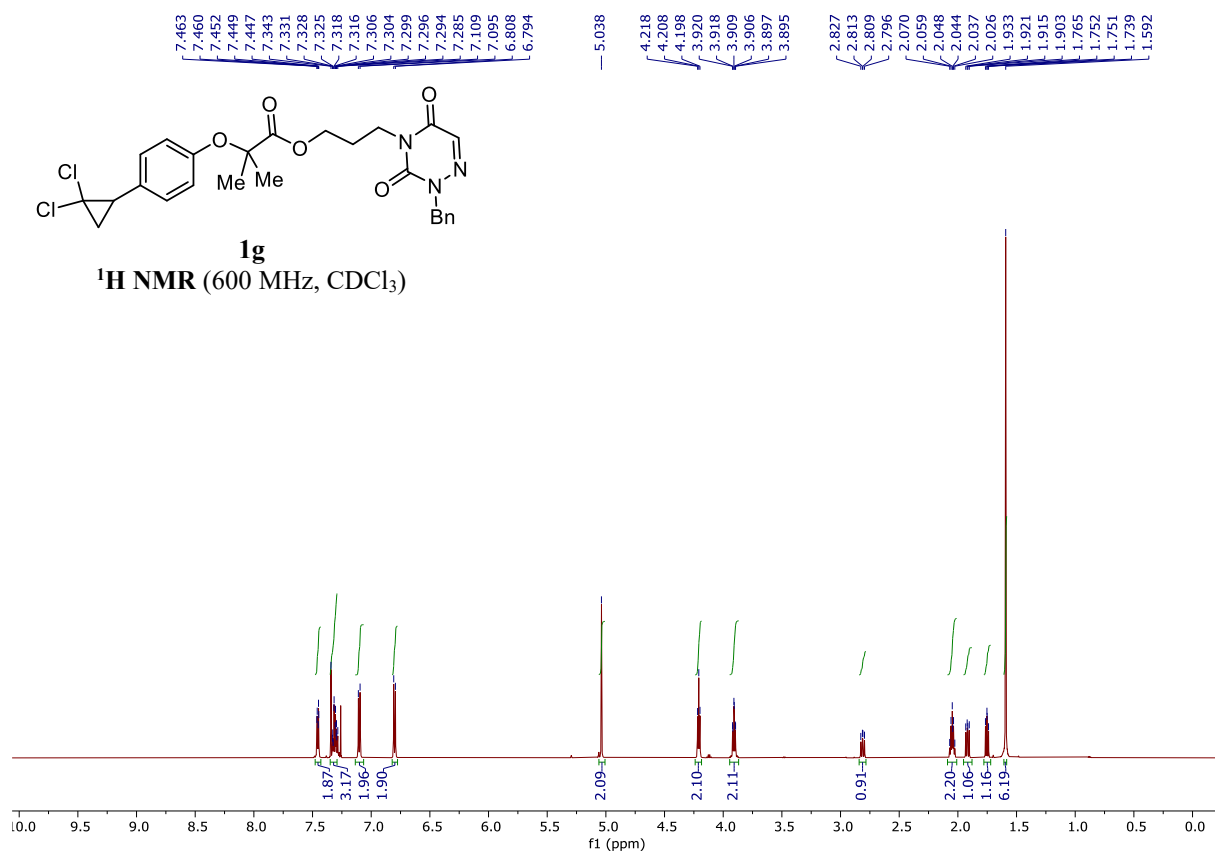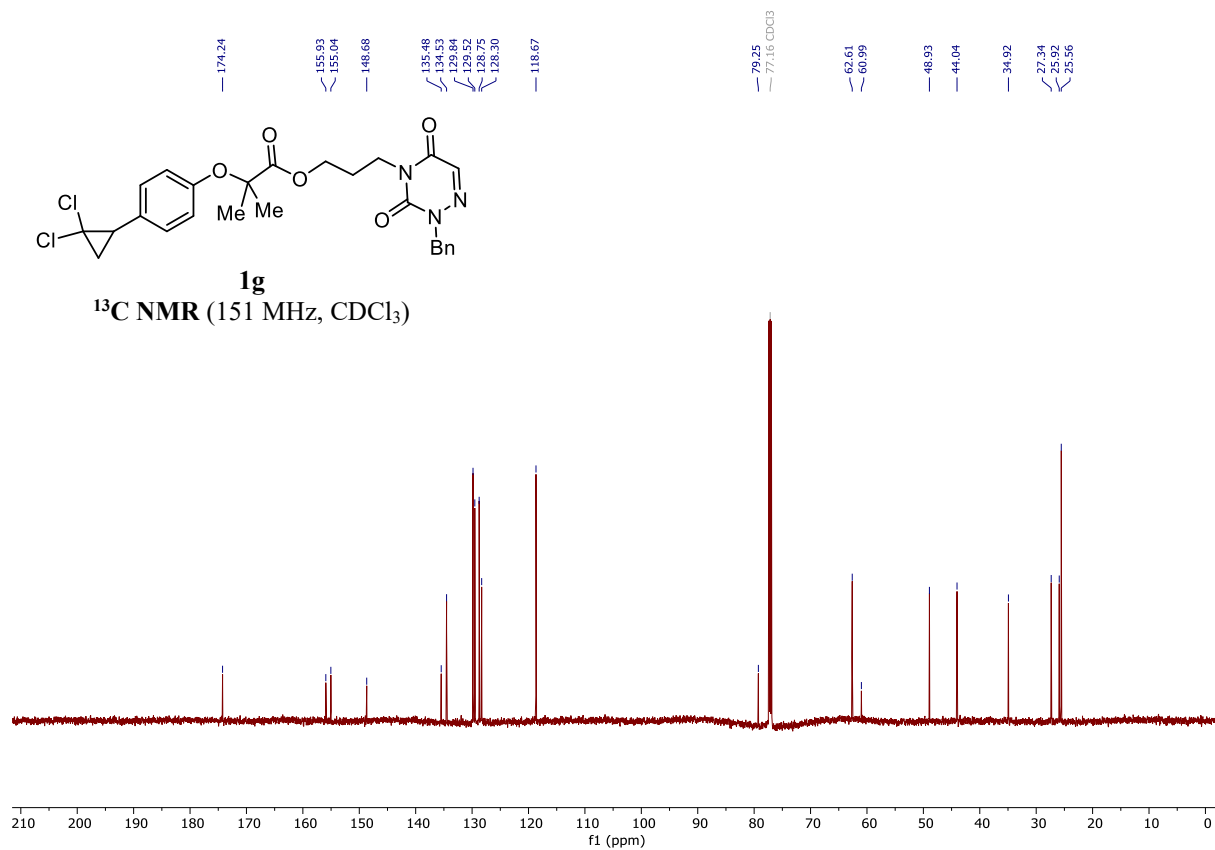

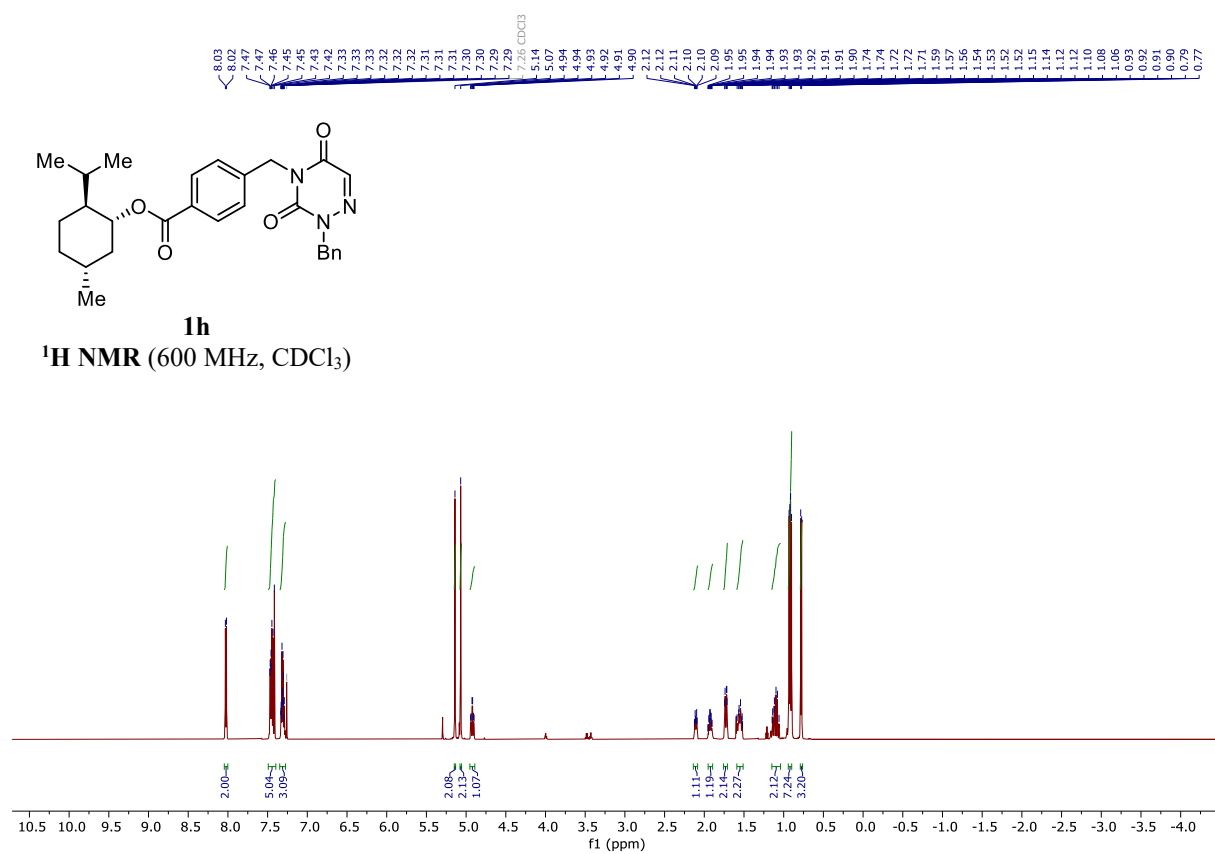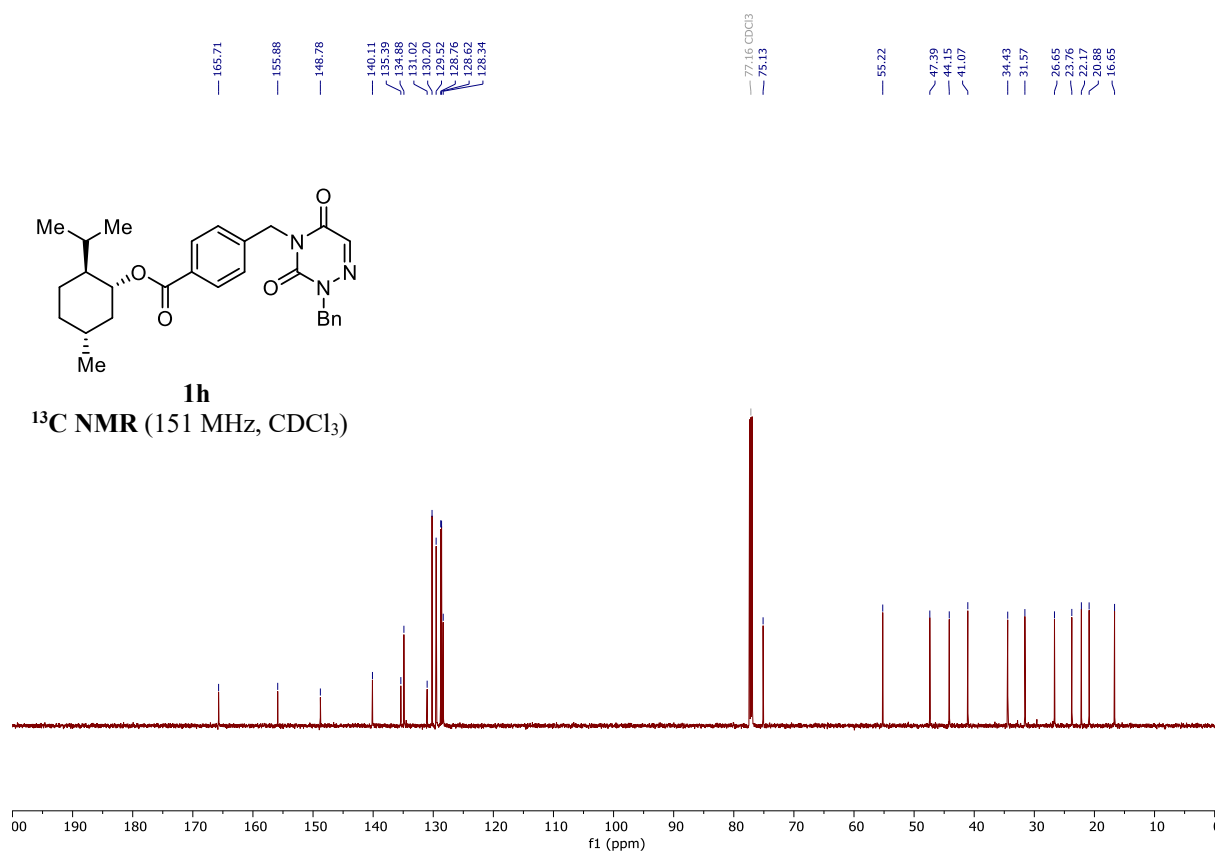

7.494  
7.490  
7.475  
7.471  
7.461  
7.442  
7.400  
7.396  
7.393  
7.368  
7.362  
7.357  
7.337  
7.341  
7.332  
7.327  
7.323  
7.319  
7.311  
7.295  
7.286  
7.284  
7.280  
7.272

5.079  
5.071

2.898  
2.890  
2.878  
2.870  
2.861  
2.849  
2.841  
1.877  
1.856  
1.826  
1.817  
1.810  
1.803  
1.803  
1.741  
1.711  
1.420  
1.393  
1.385  
1.368  
1.348  
1.340  
1.310  
1.278  
1.270  
1.263  
1.255  
1.247  
1.236  
1.224  
1.216  
1.210

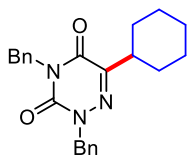

3

<sup>1</sup>H NMR (400 MHz, CDCl<sub>3</sub>)

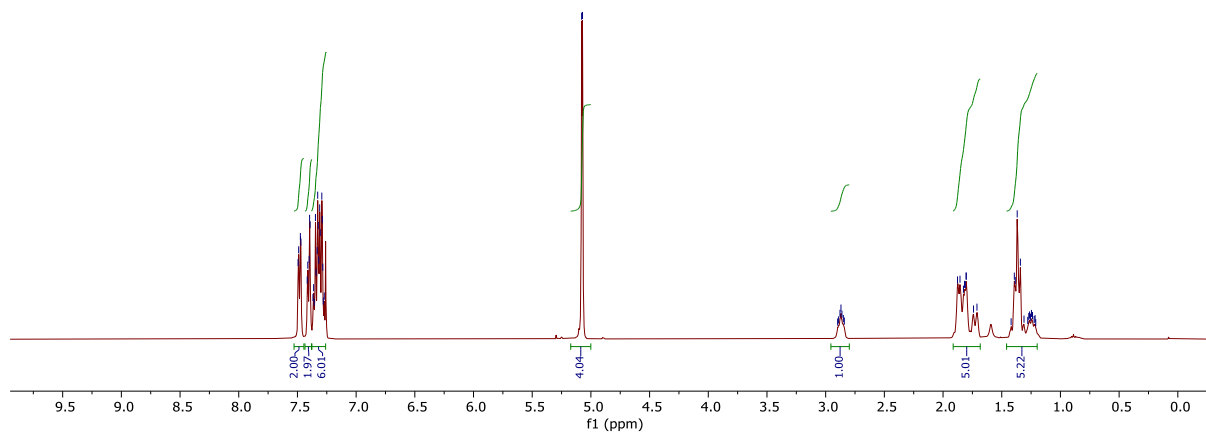

155.80  
149.10  
148.98  
136.02  
135.95  
135.82  
128.87  
128.77  
128.66  
128.24  
128.10

77.16 CDCl<sub>3</sub>

55.38  
44.29  
38.56  
30.58  
28.26  
26.11

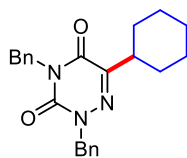

4

<sup>13</sup>C NMR (101 MHz, CDCl<sub>3</sub>)

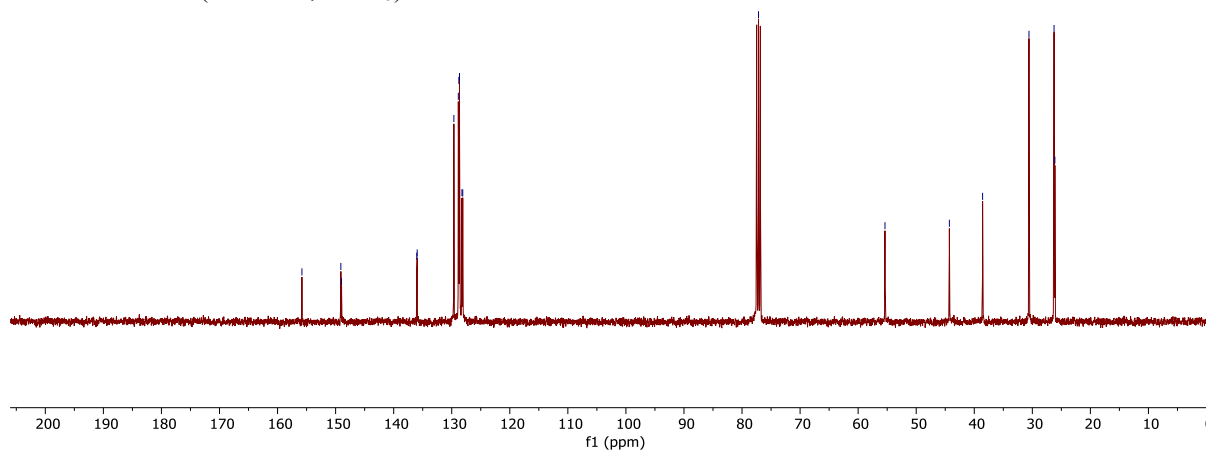

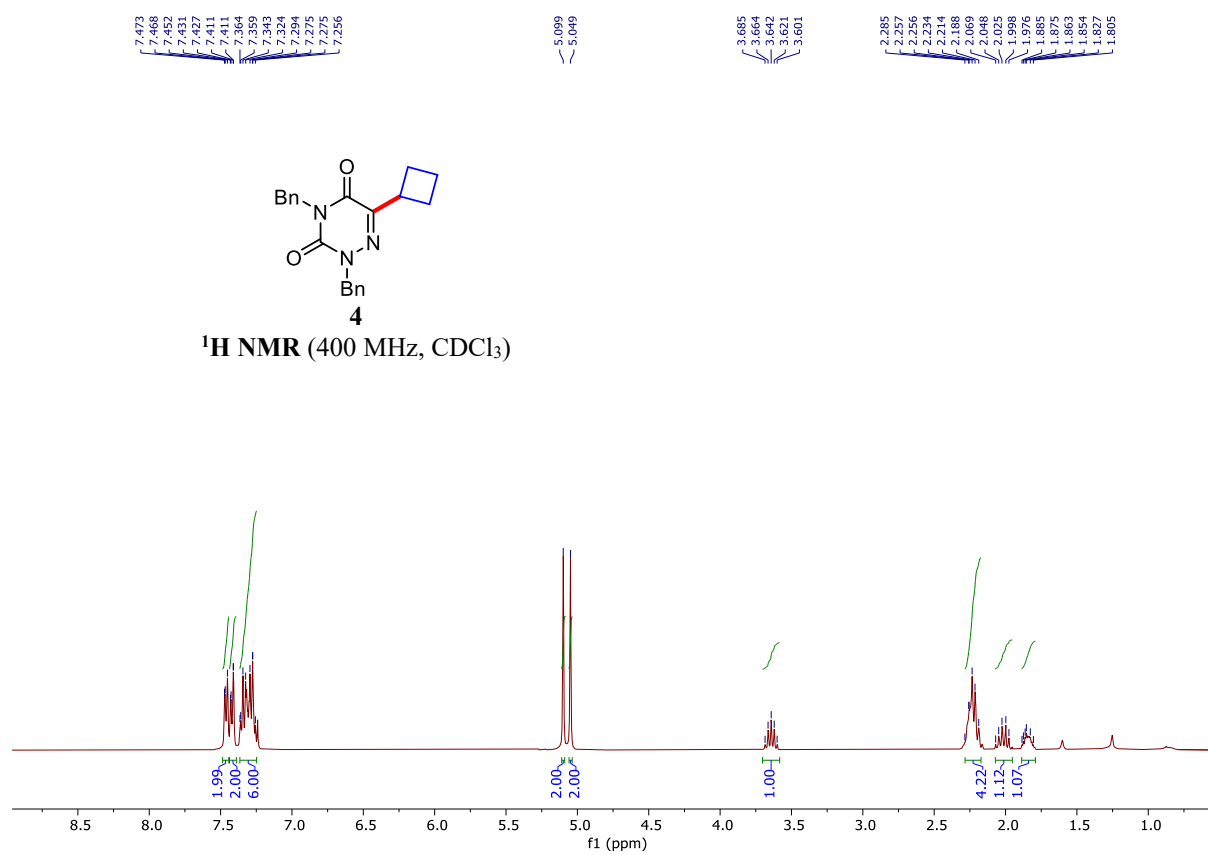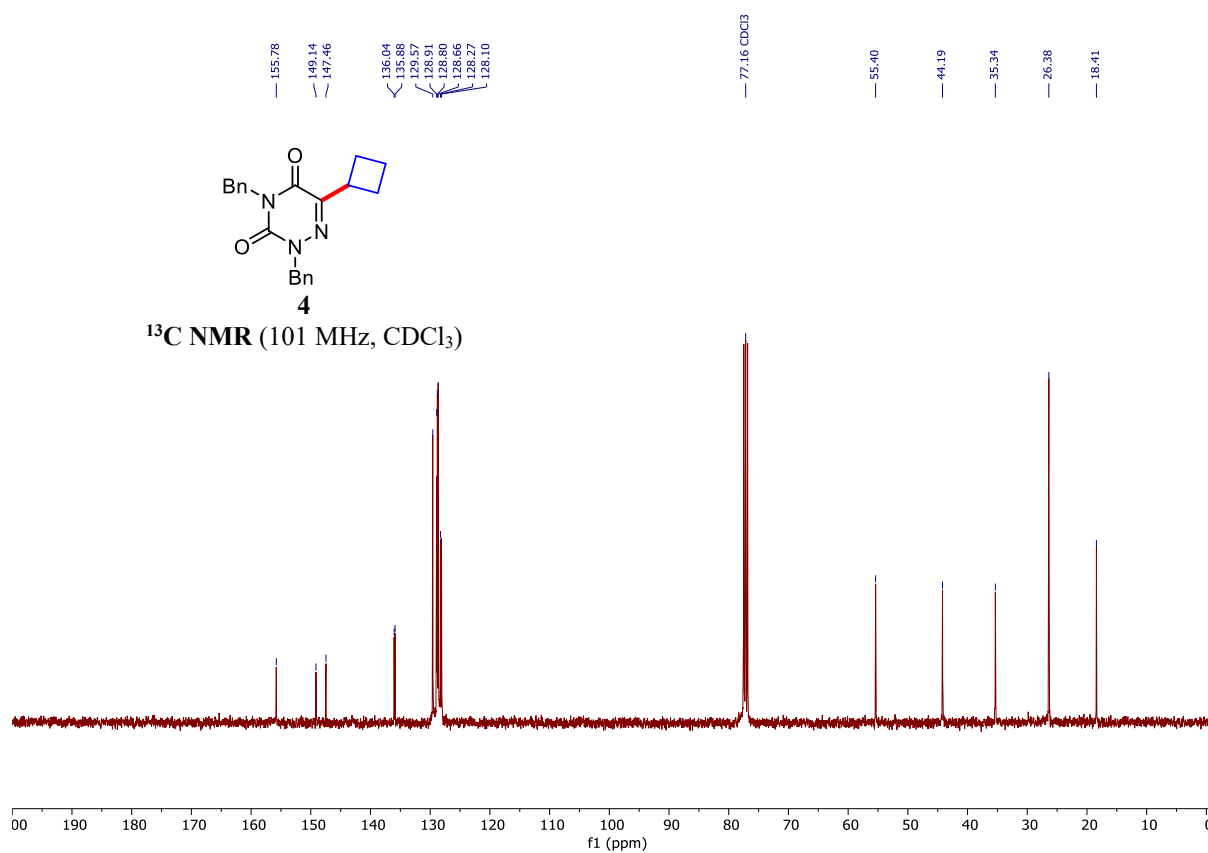

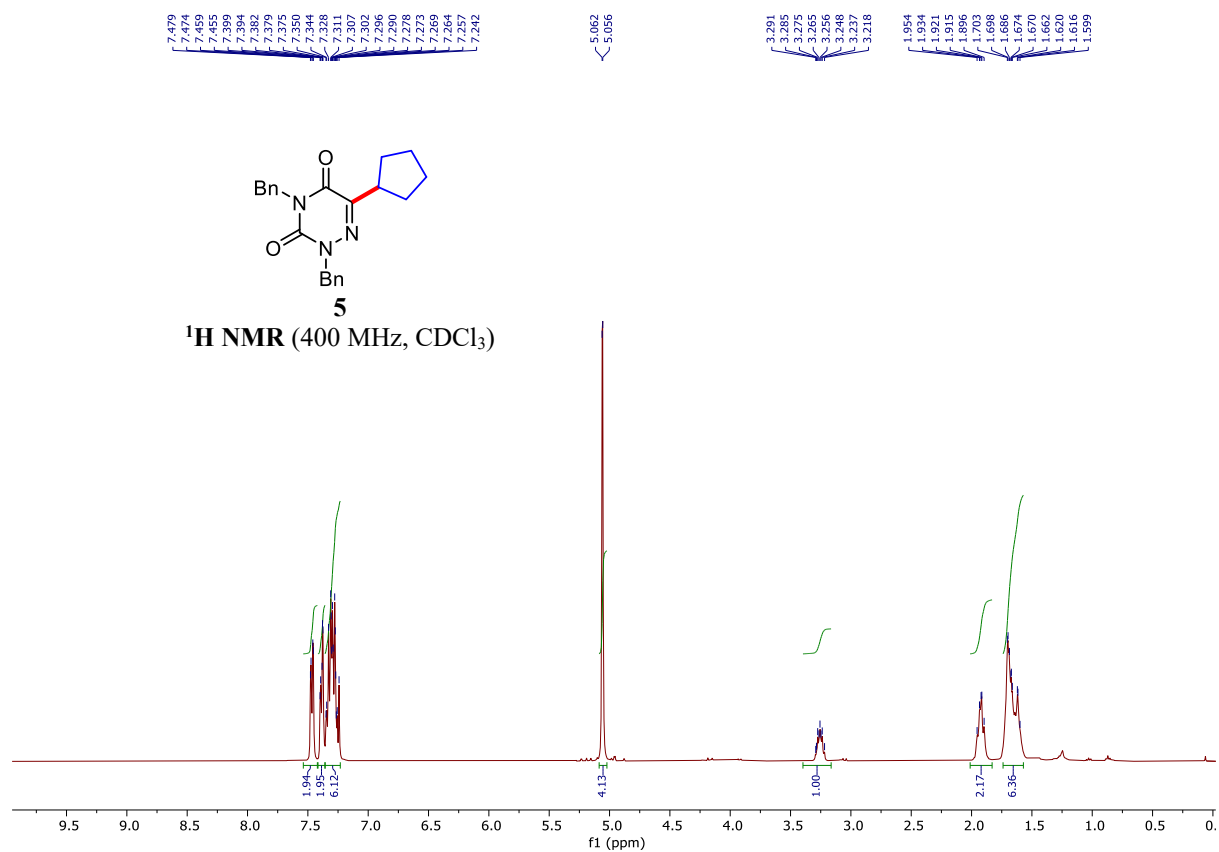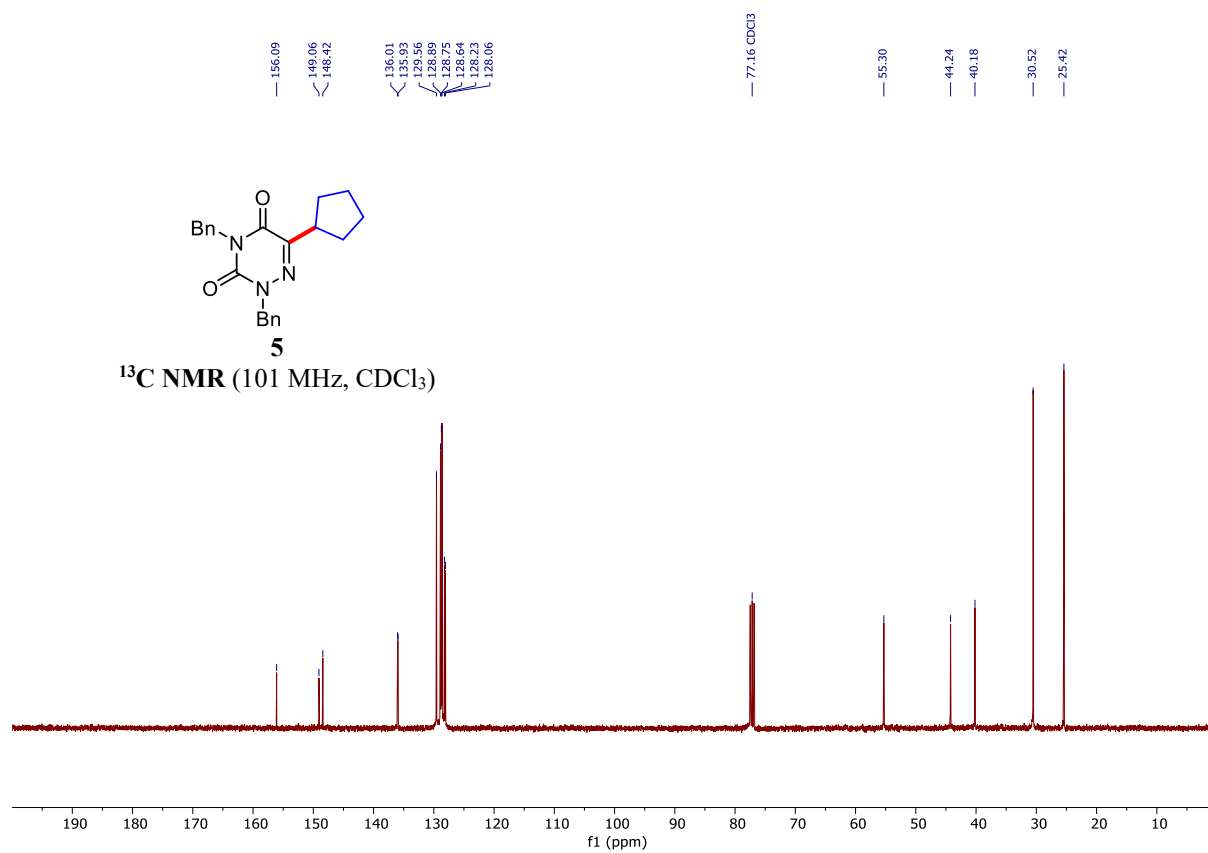

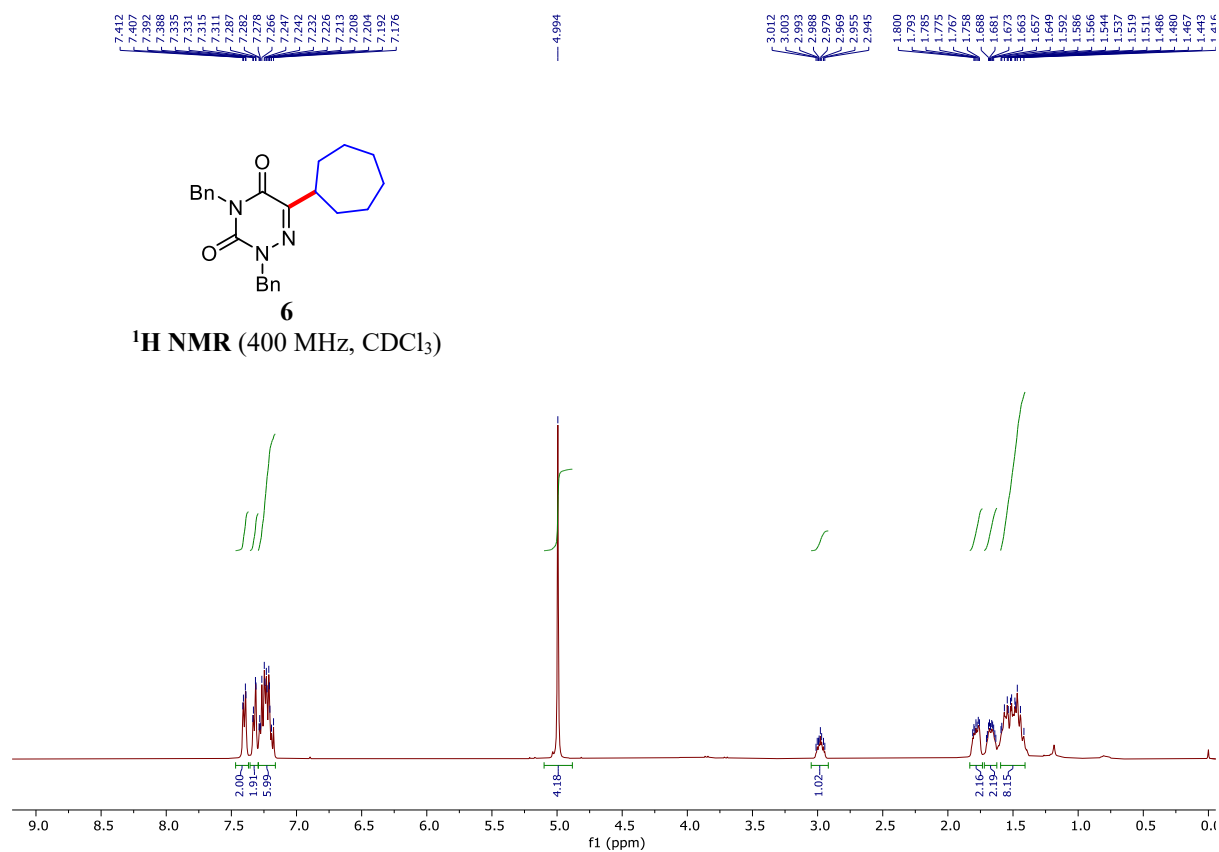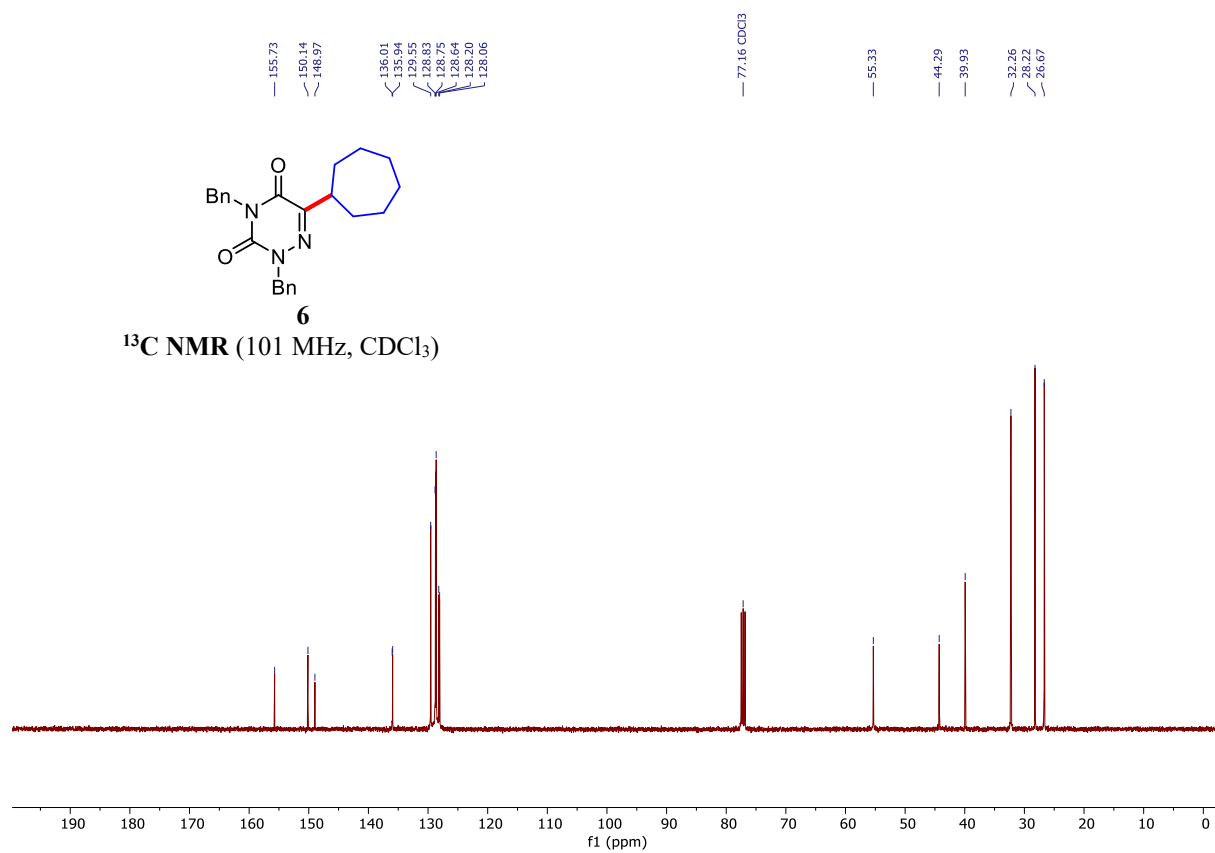

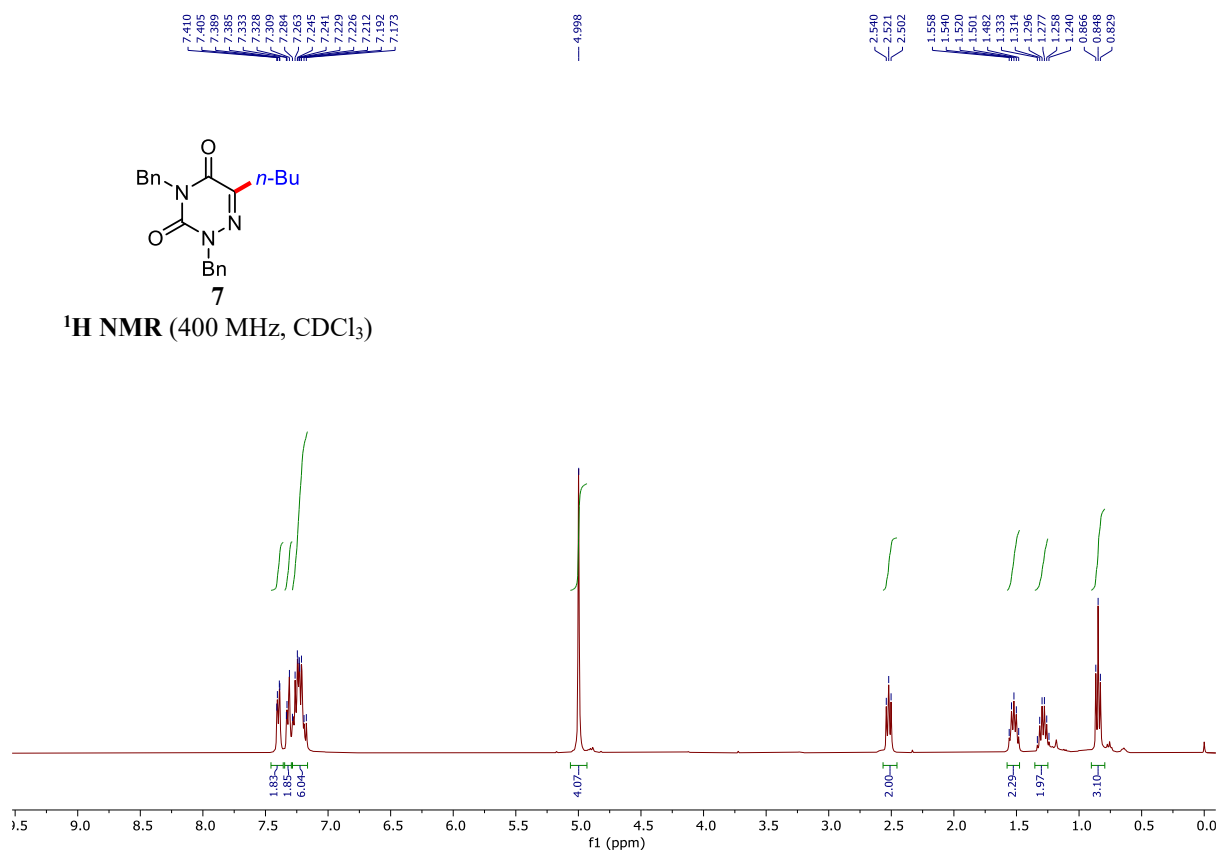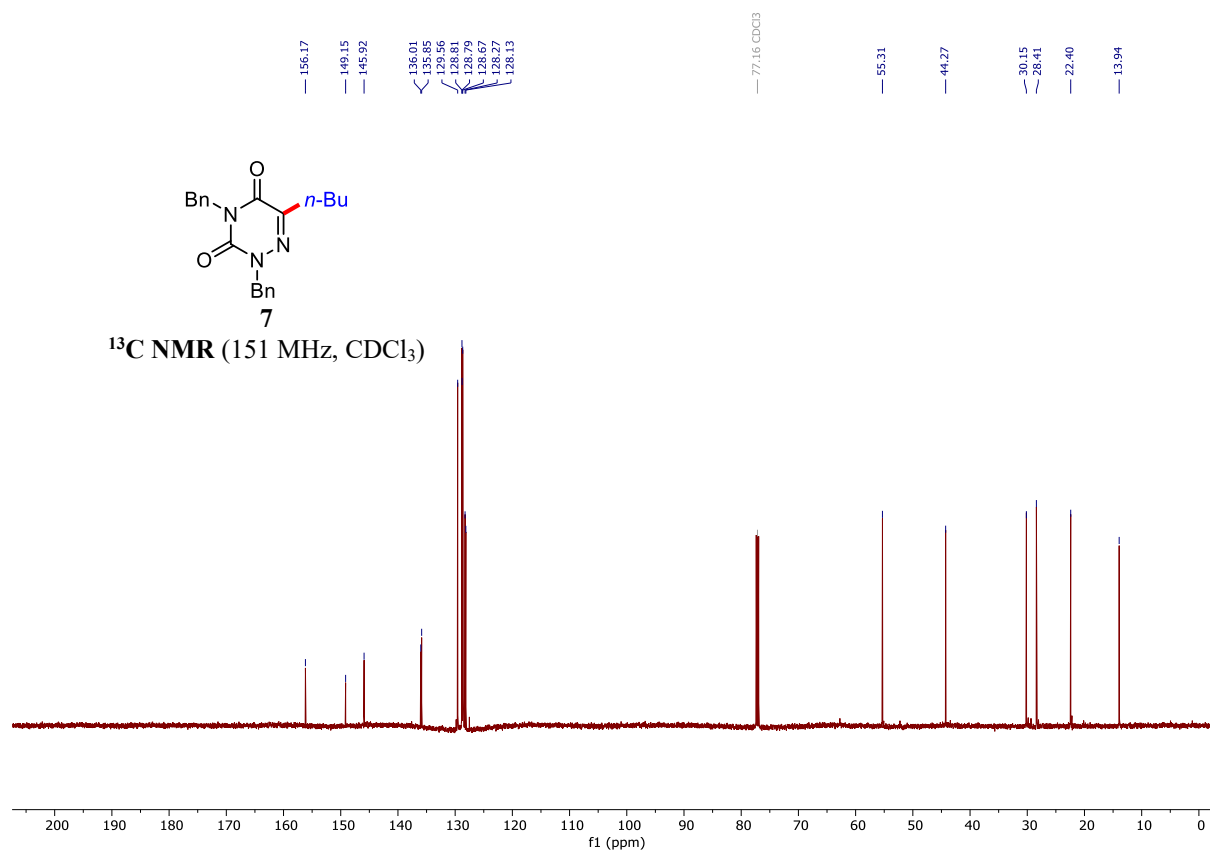

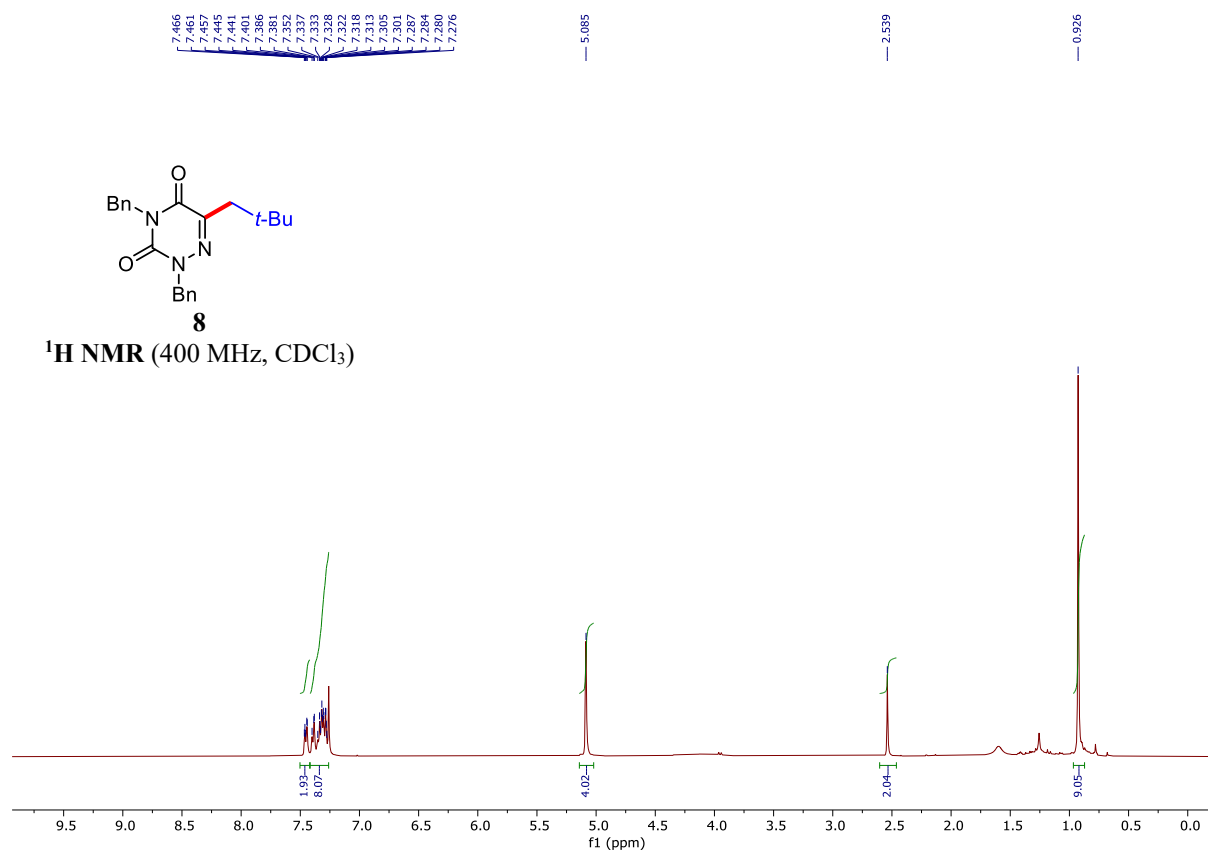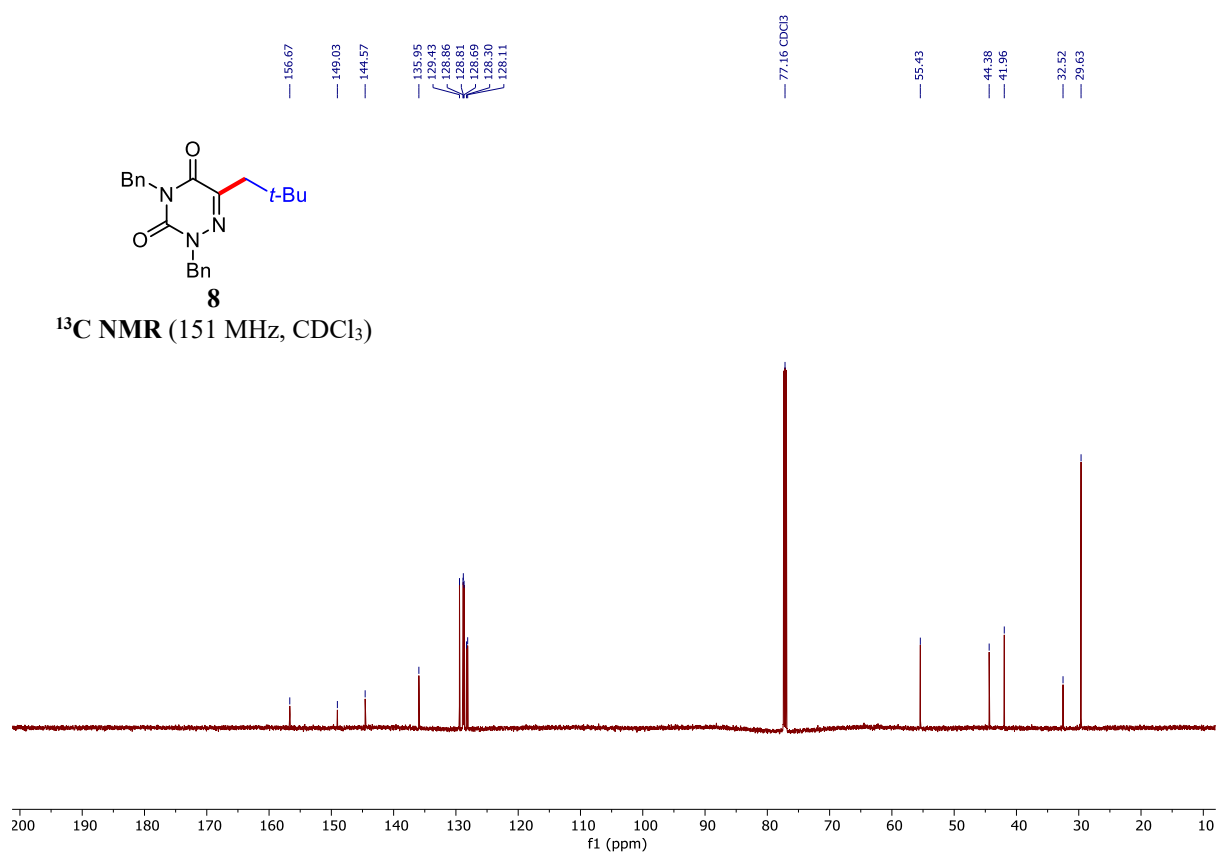



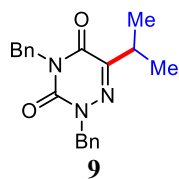

<sup>1</sup>H NMR (400 MHz, CDCl<sub>3</sub>)

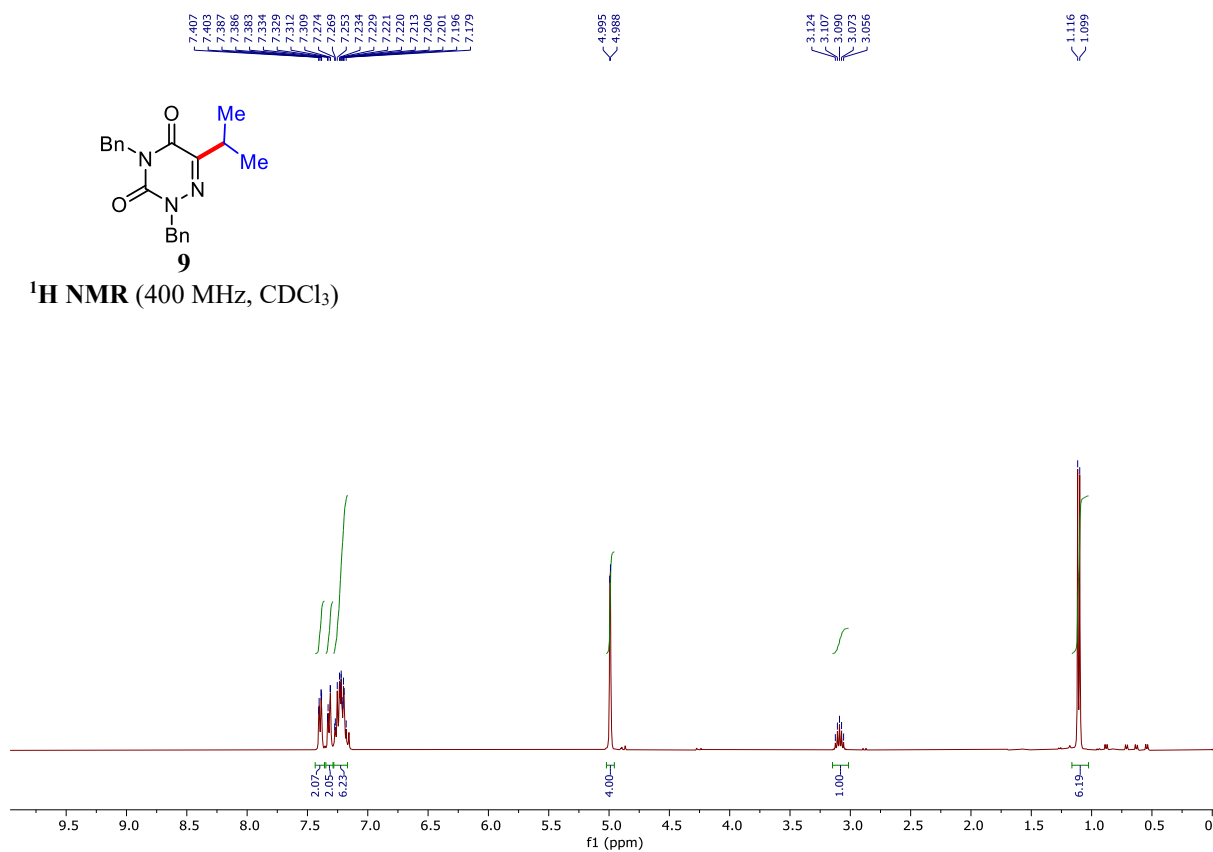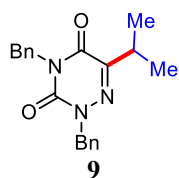

<sup>13</sup>C NMR (101 MHz, CDCl<sub>3</sub>)

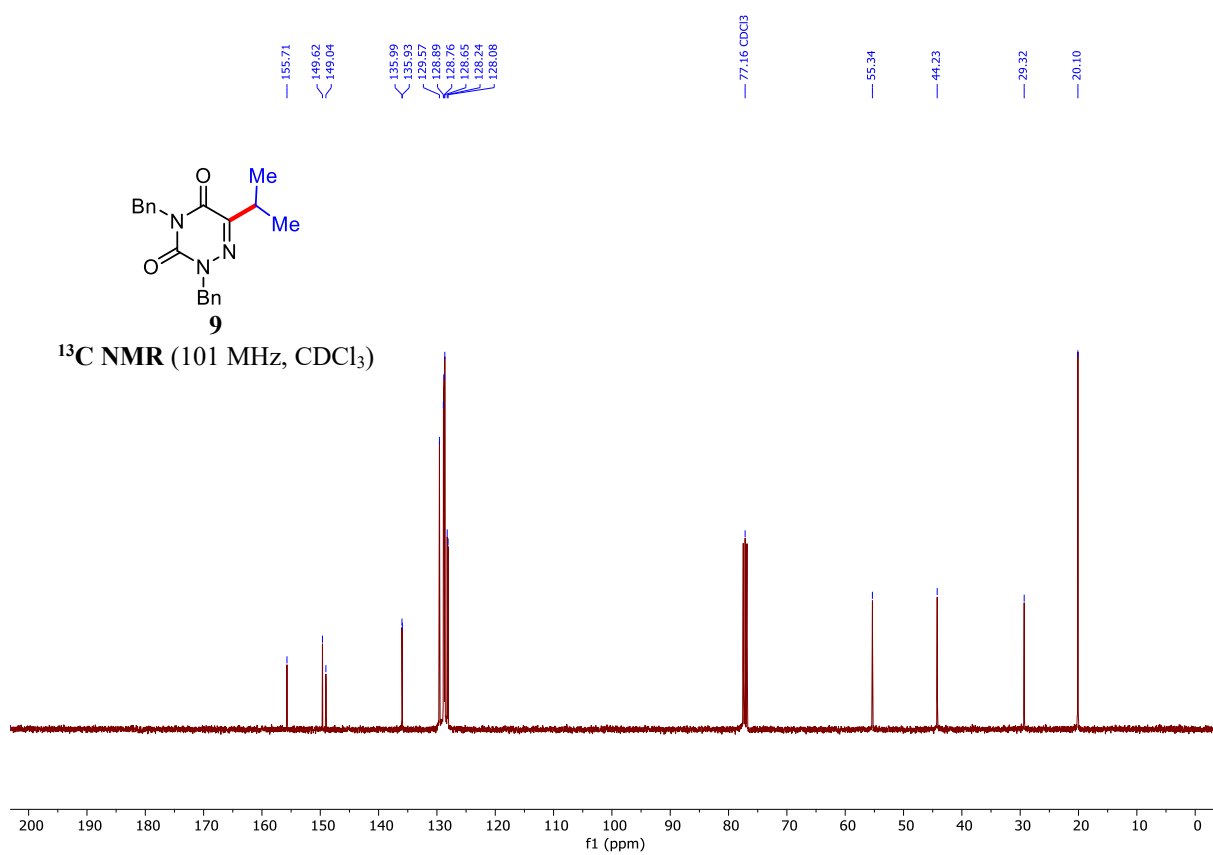

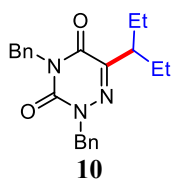

$^1\text{H}$  NMR (400 MHz,  $\text{CDCl}_3$ )

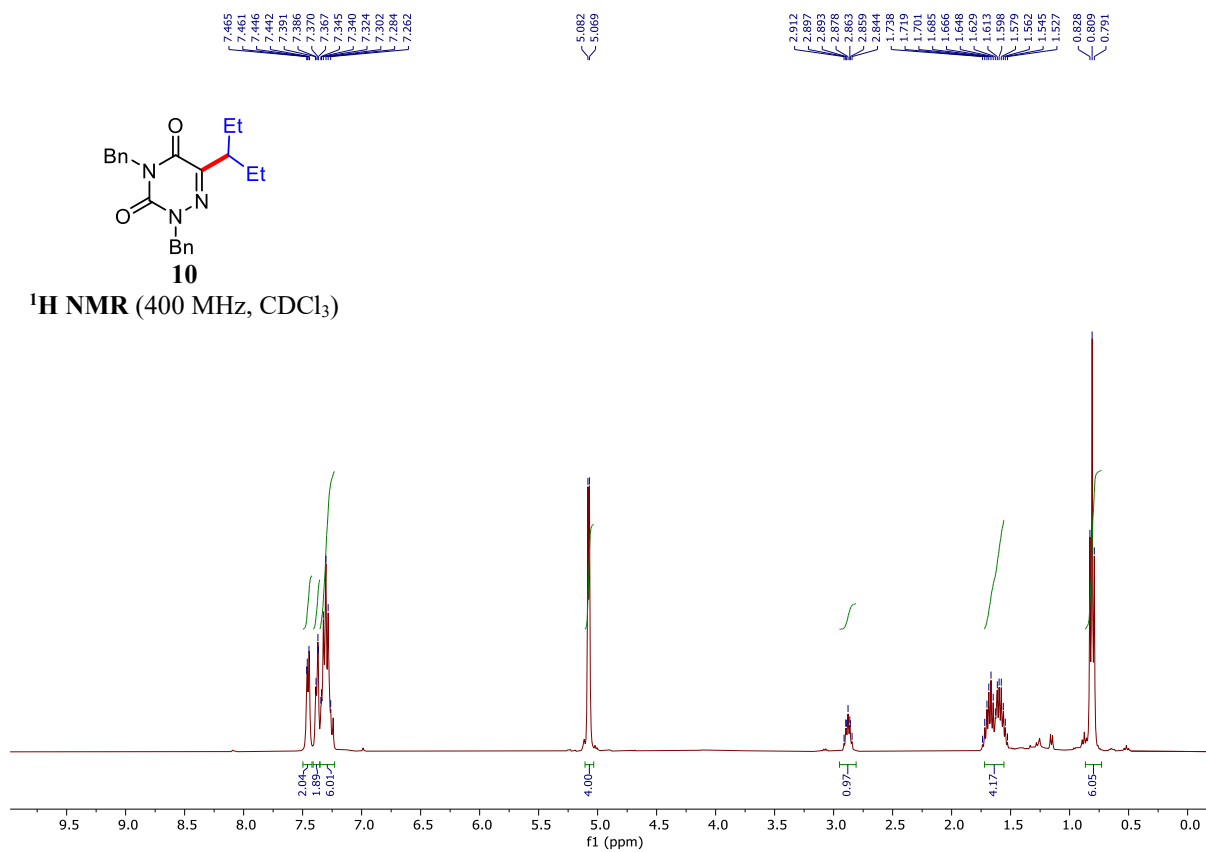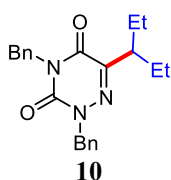

$^{13}\text{C}$  NMR (101 MHz,  $\text{CDCl}_3$ )

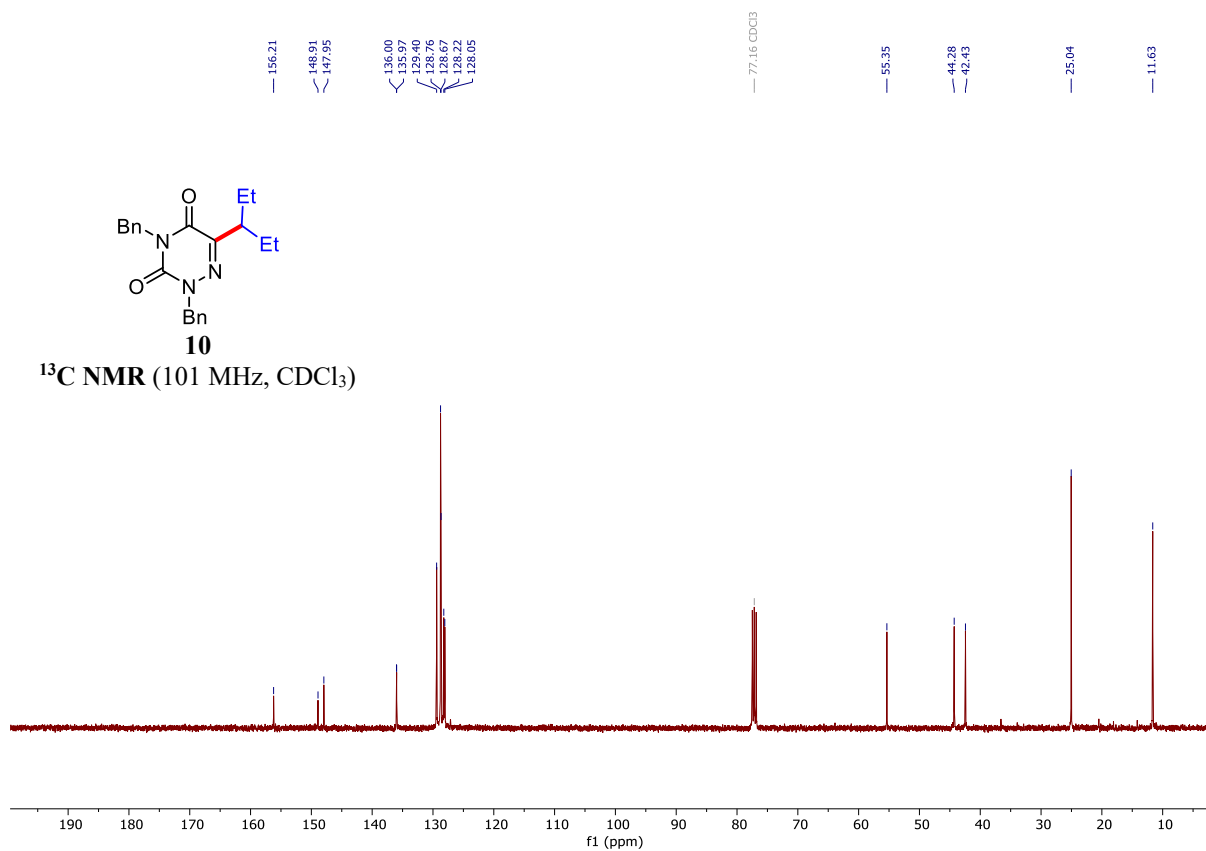

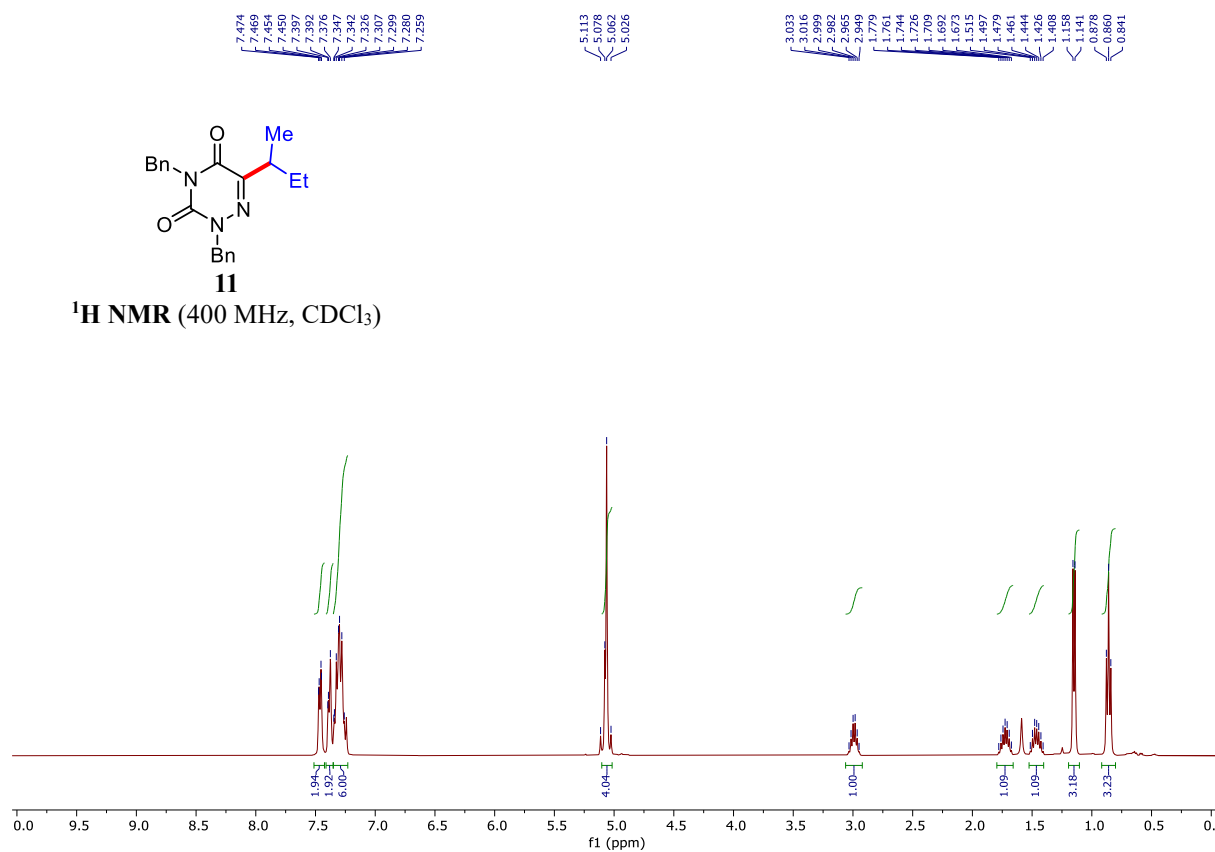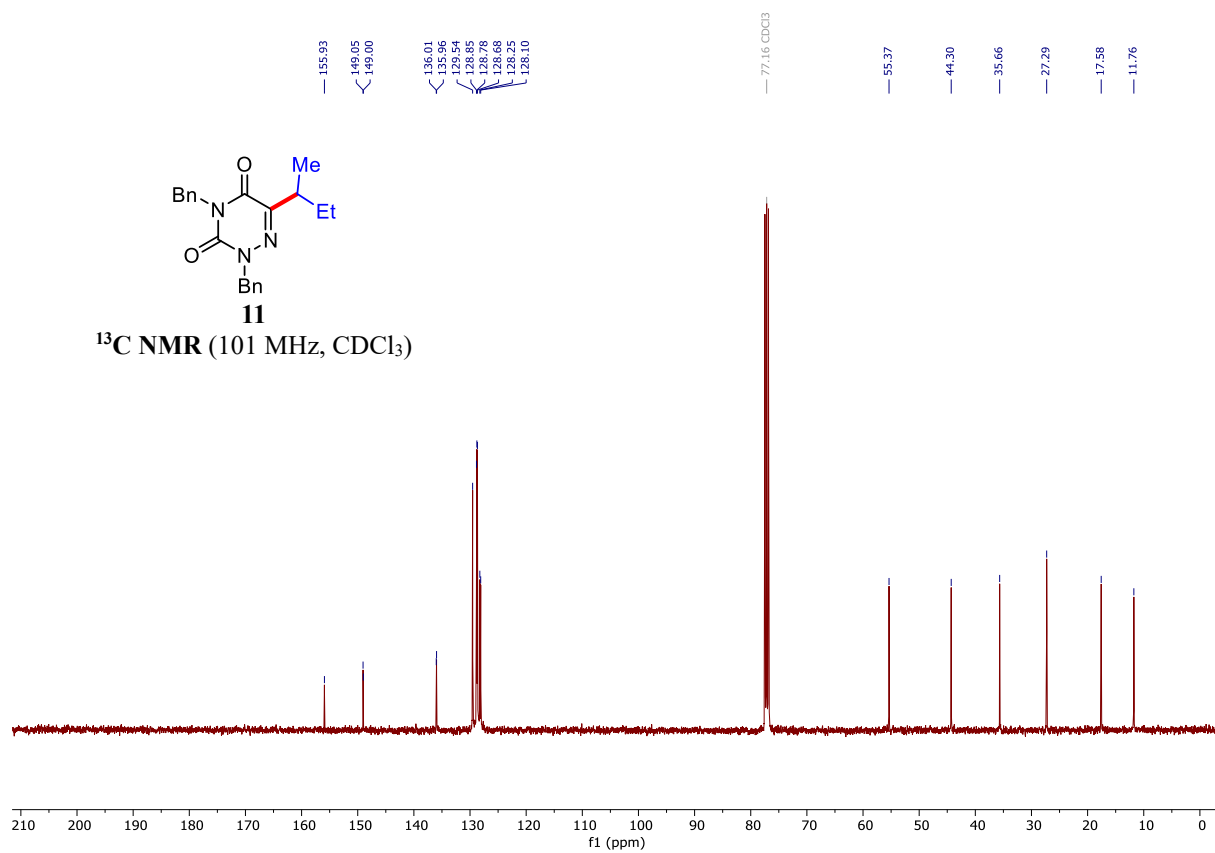

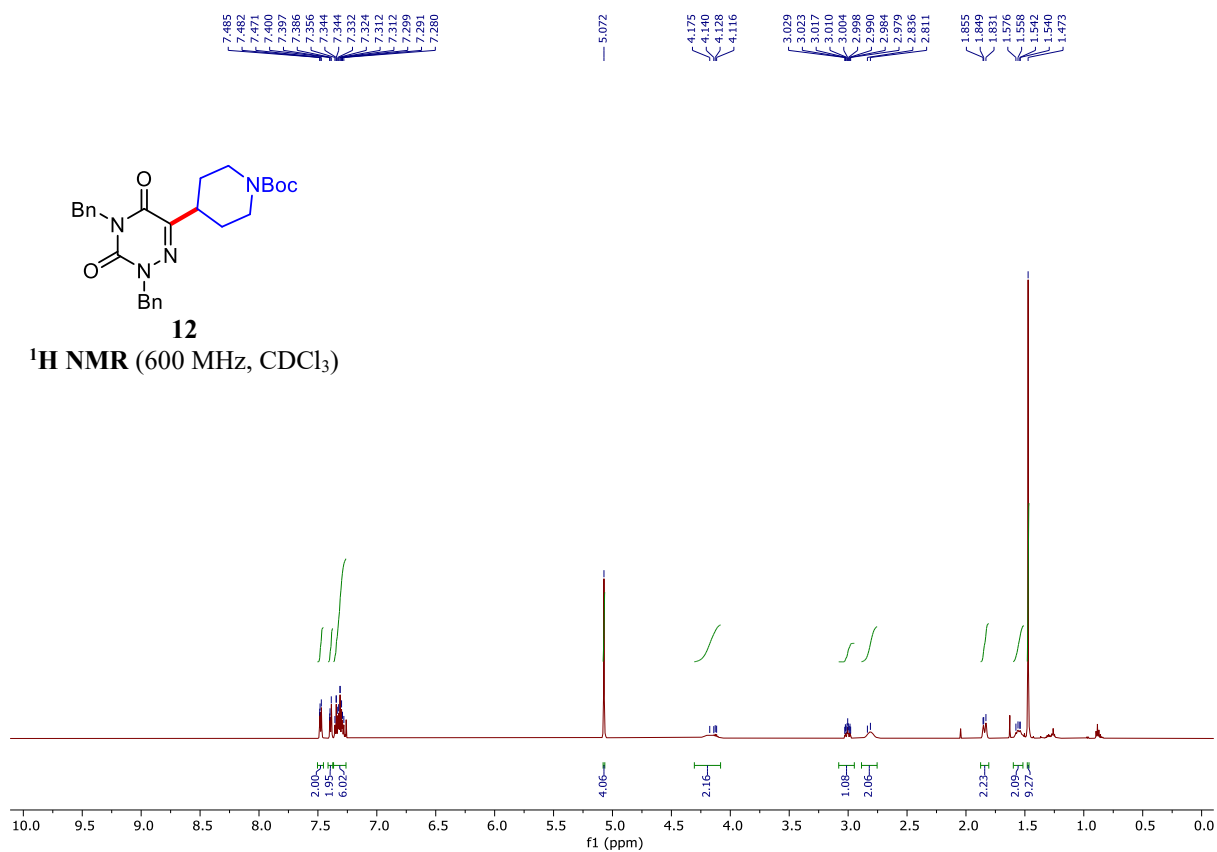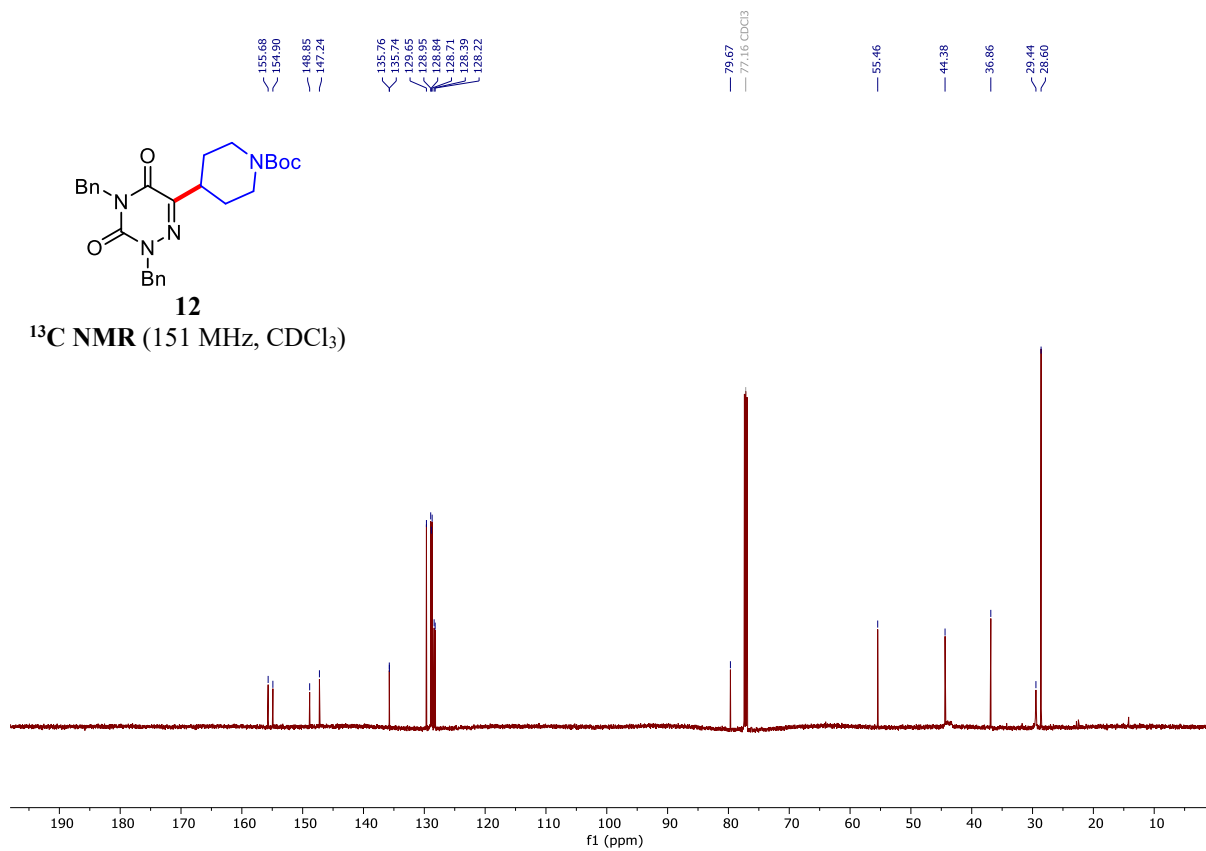

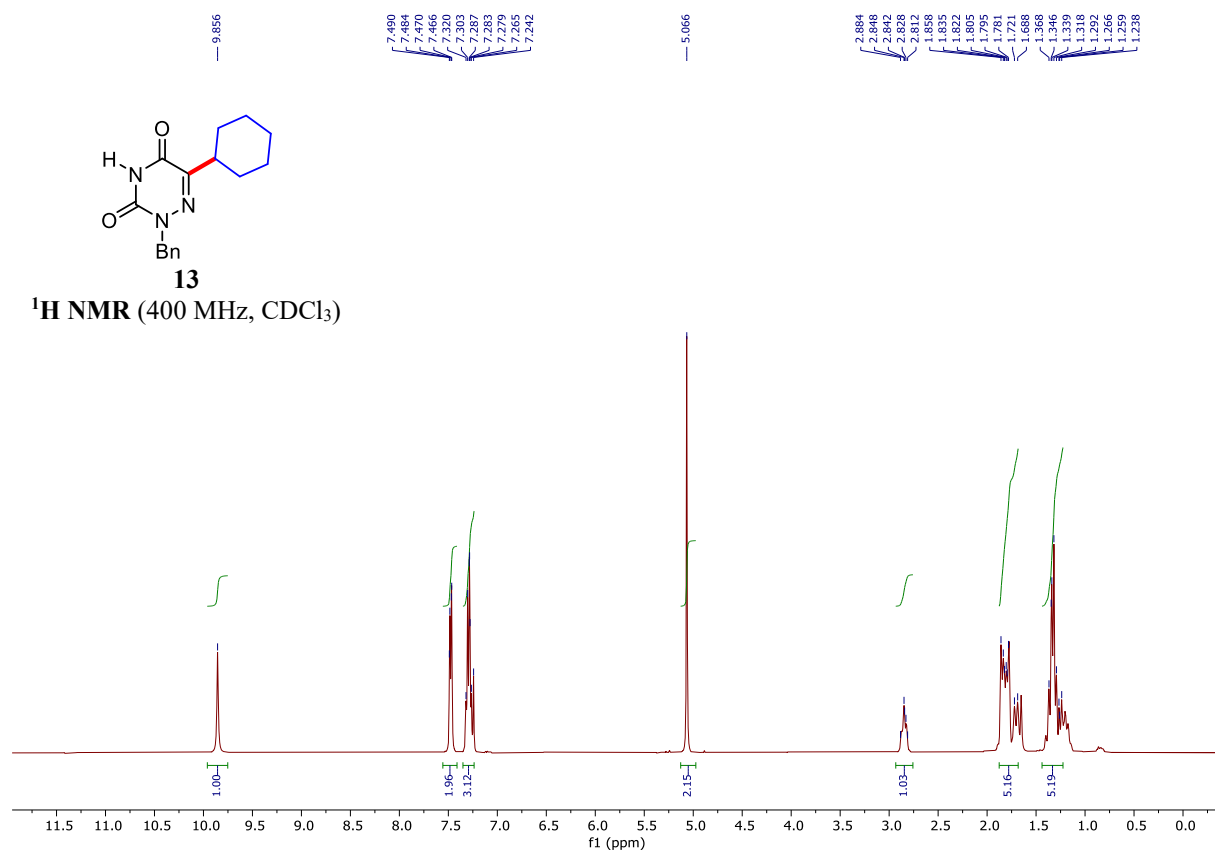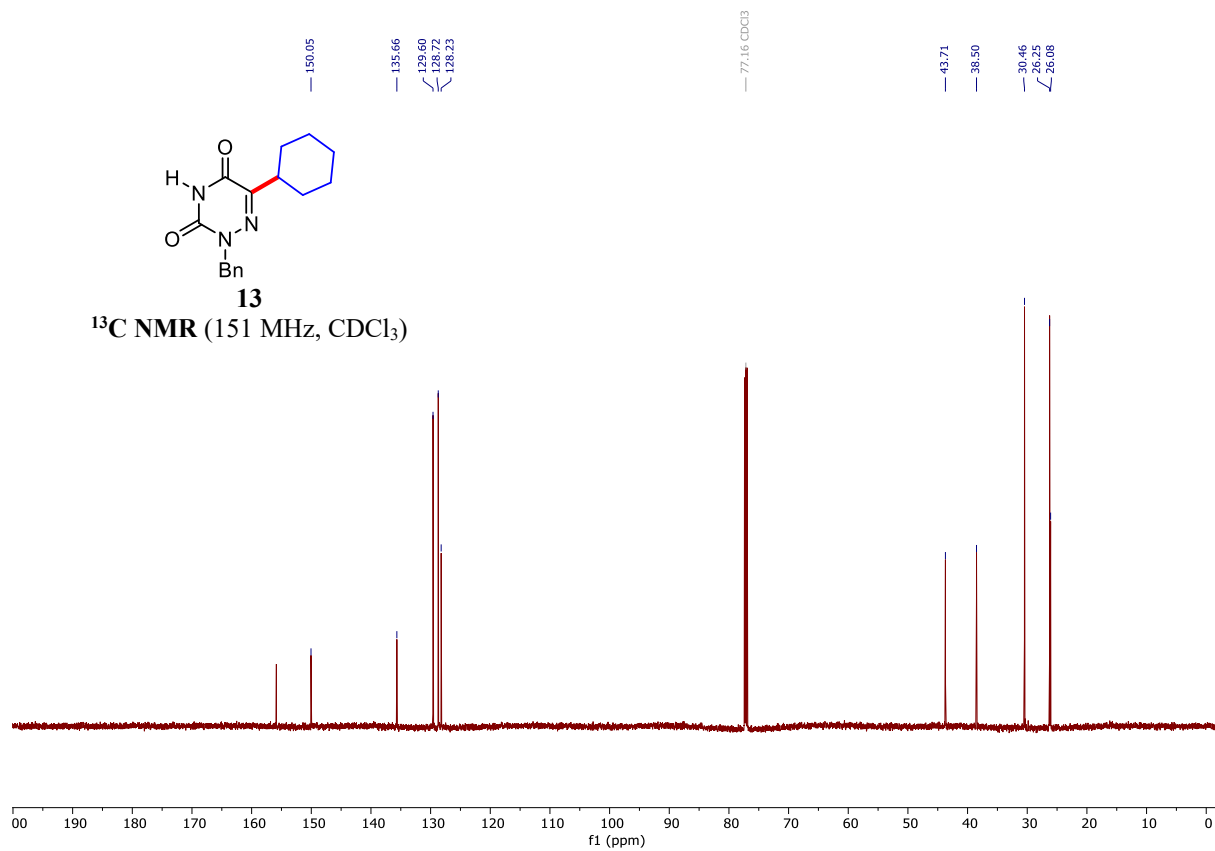

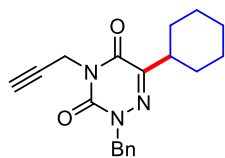

**14**

$^1\text{H}$  NMR (400 MHz,  $\text{CDCl}_3$ )

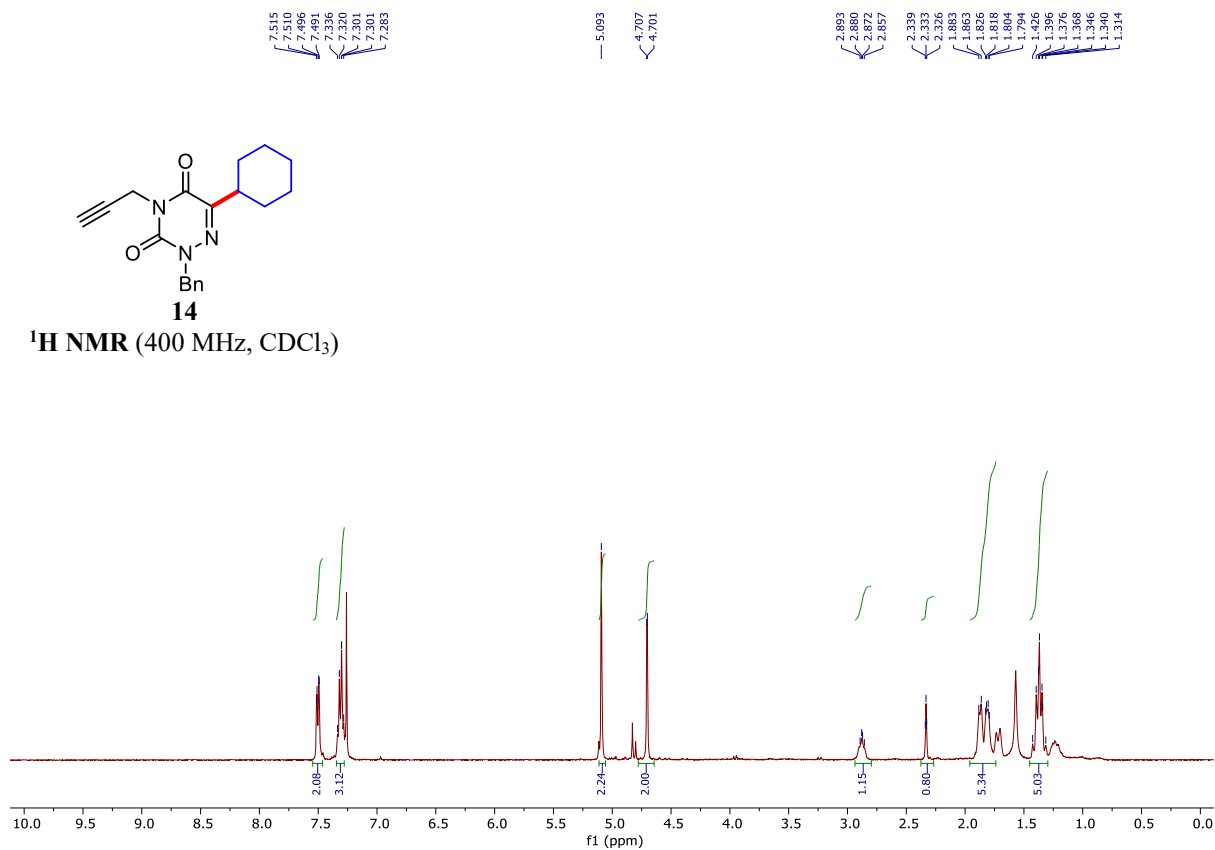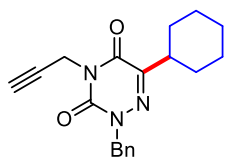

**14**

$^{13}\text{C}$  NMR (151 MHz,  $\text{CDCl}_3$ )

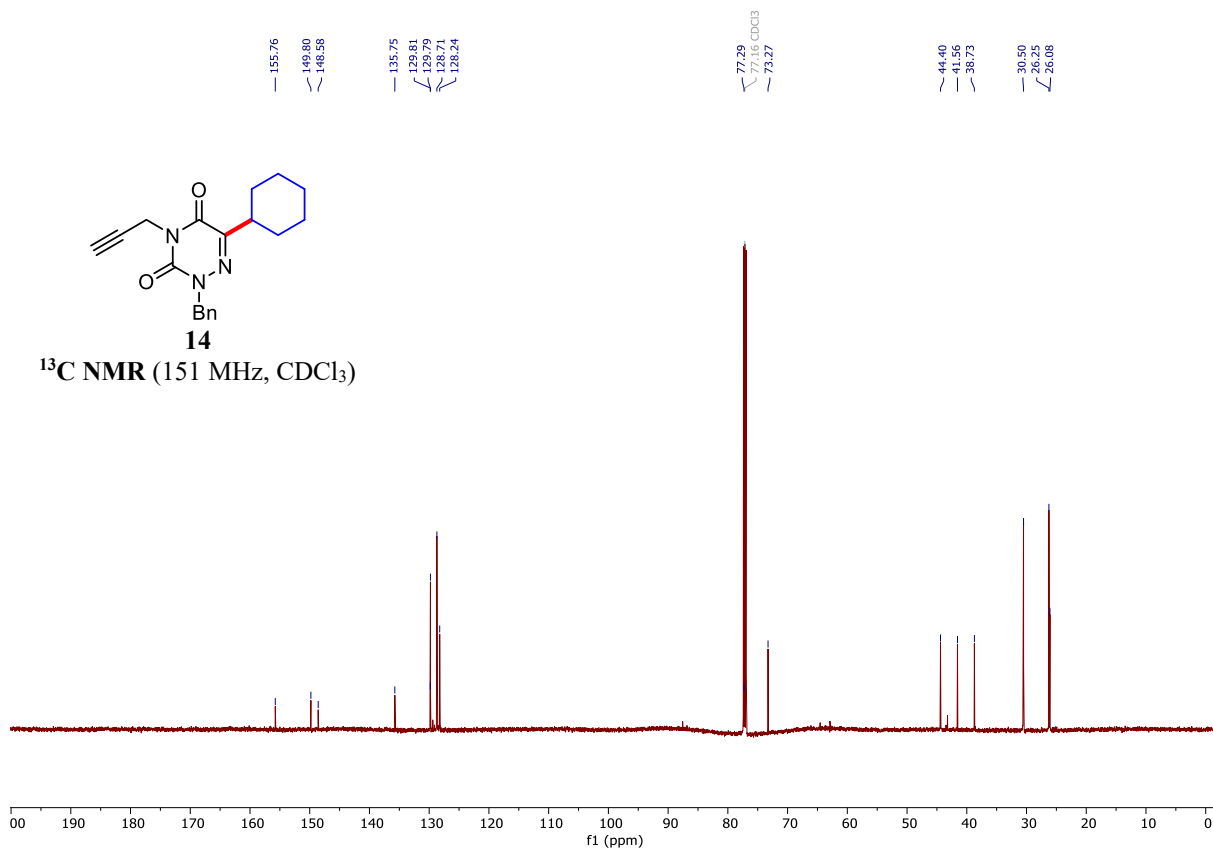

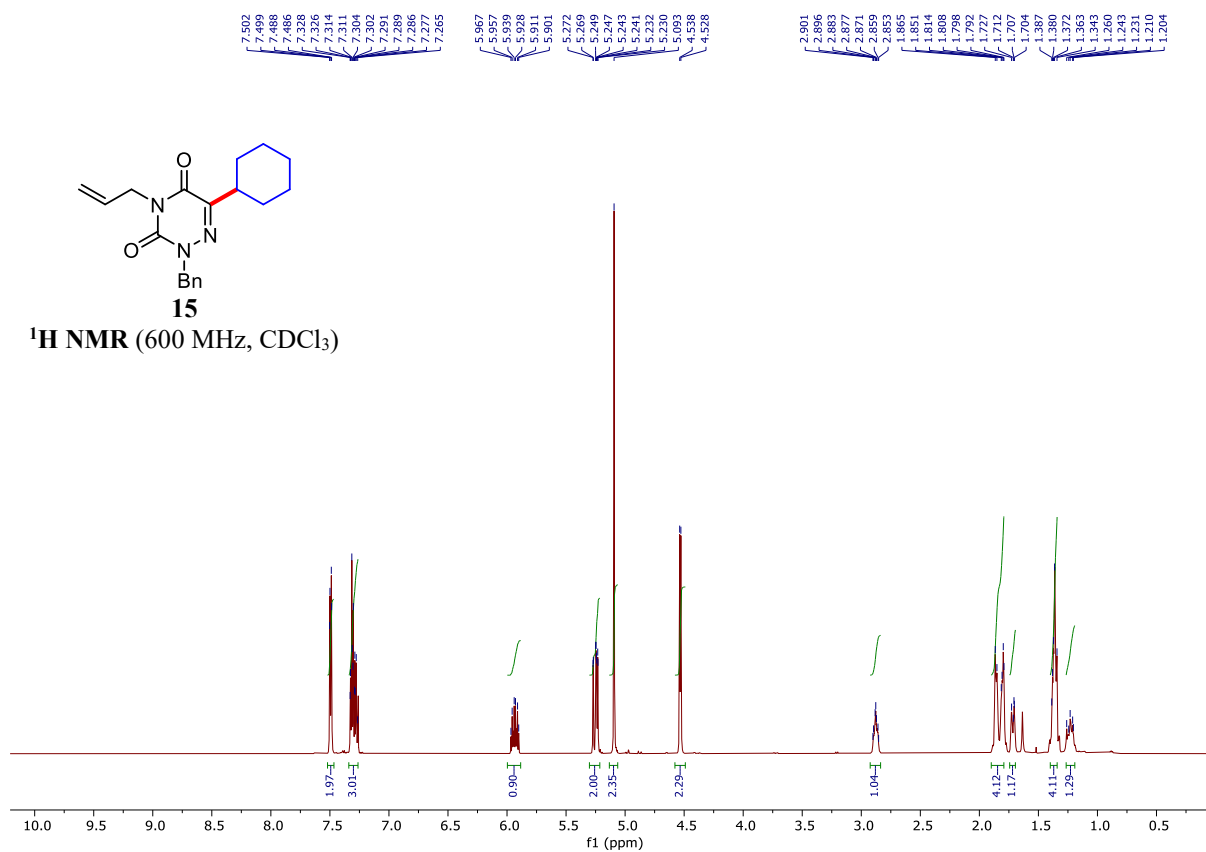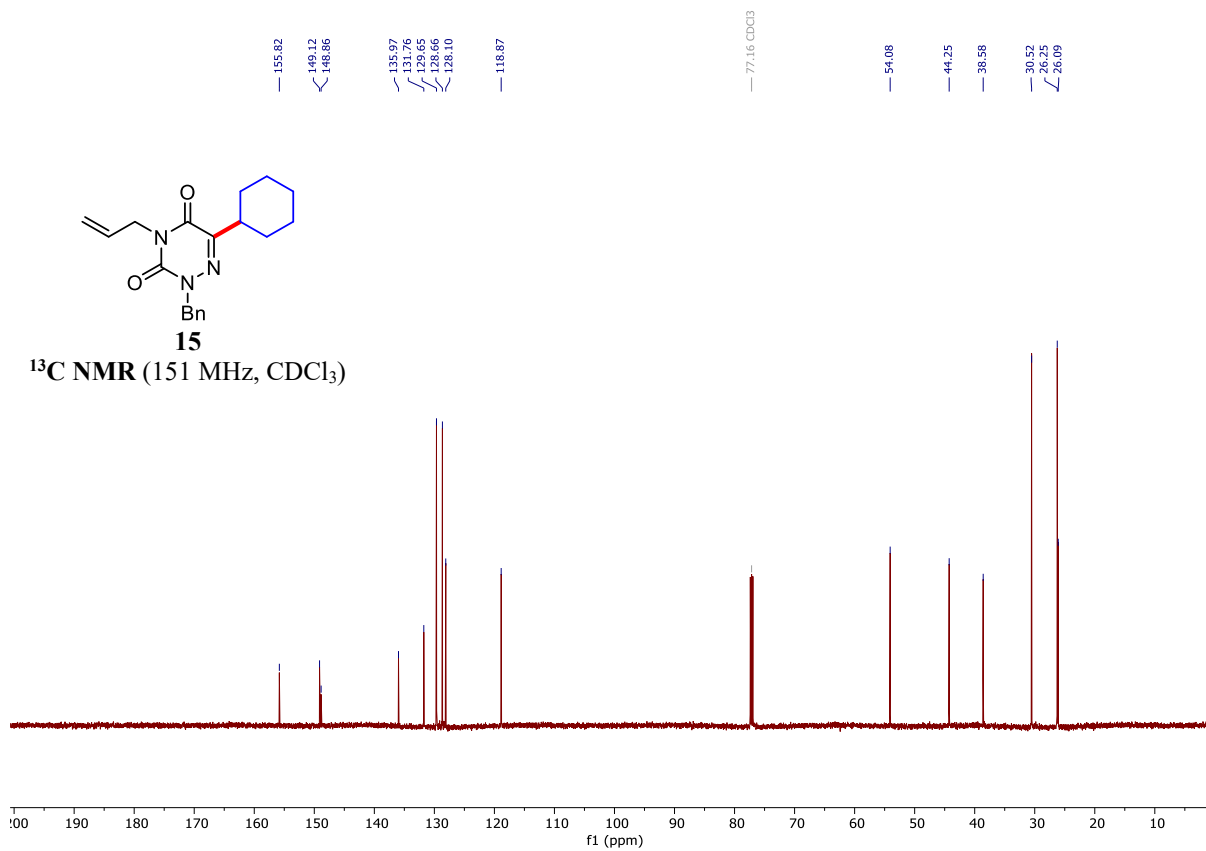

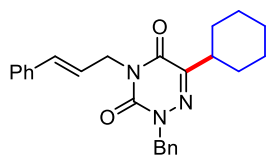

**16**

<sup>1</sup>H NMR (400 MHz, CDCl<sub>3</sub>)

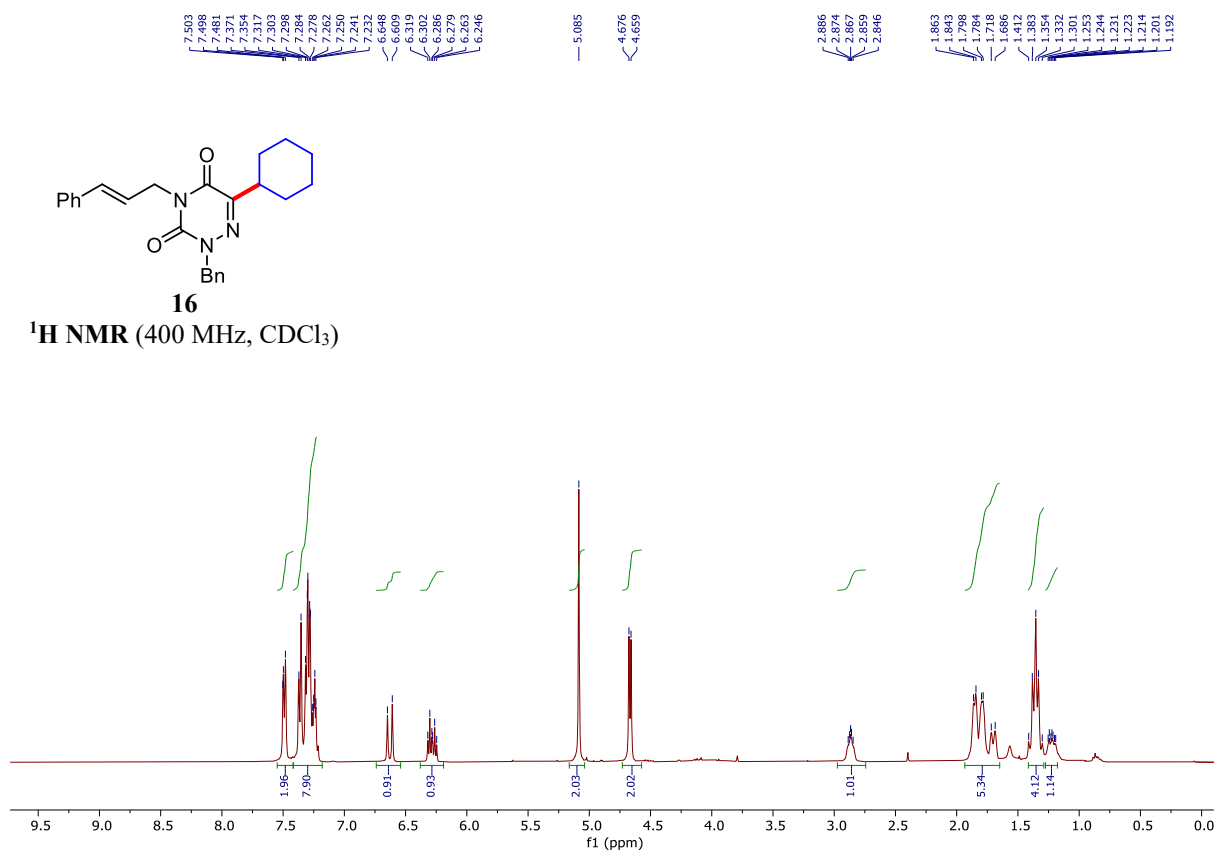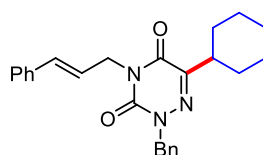

**16**

<sup>13</sup>C NMR (151 MHz, CDCl<sub>3</sub>)

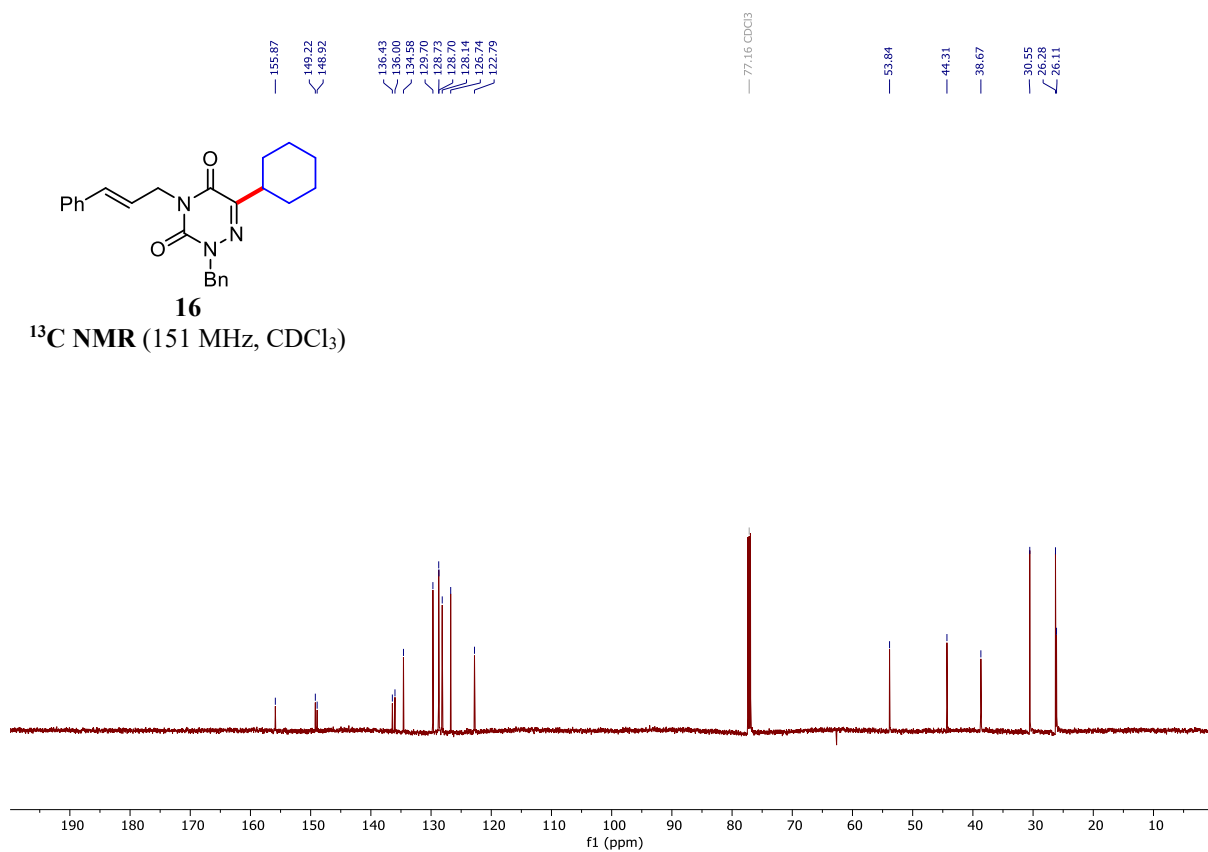



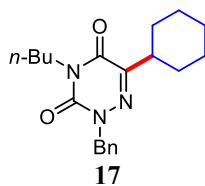

$^1\text{H}$  NMR (400 MHz,  $\text{CDCl}_3$ )

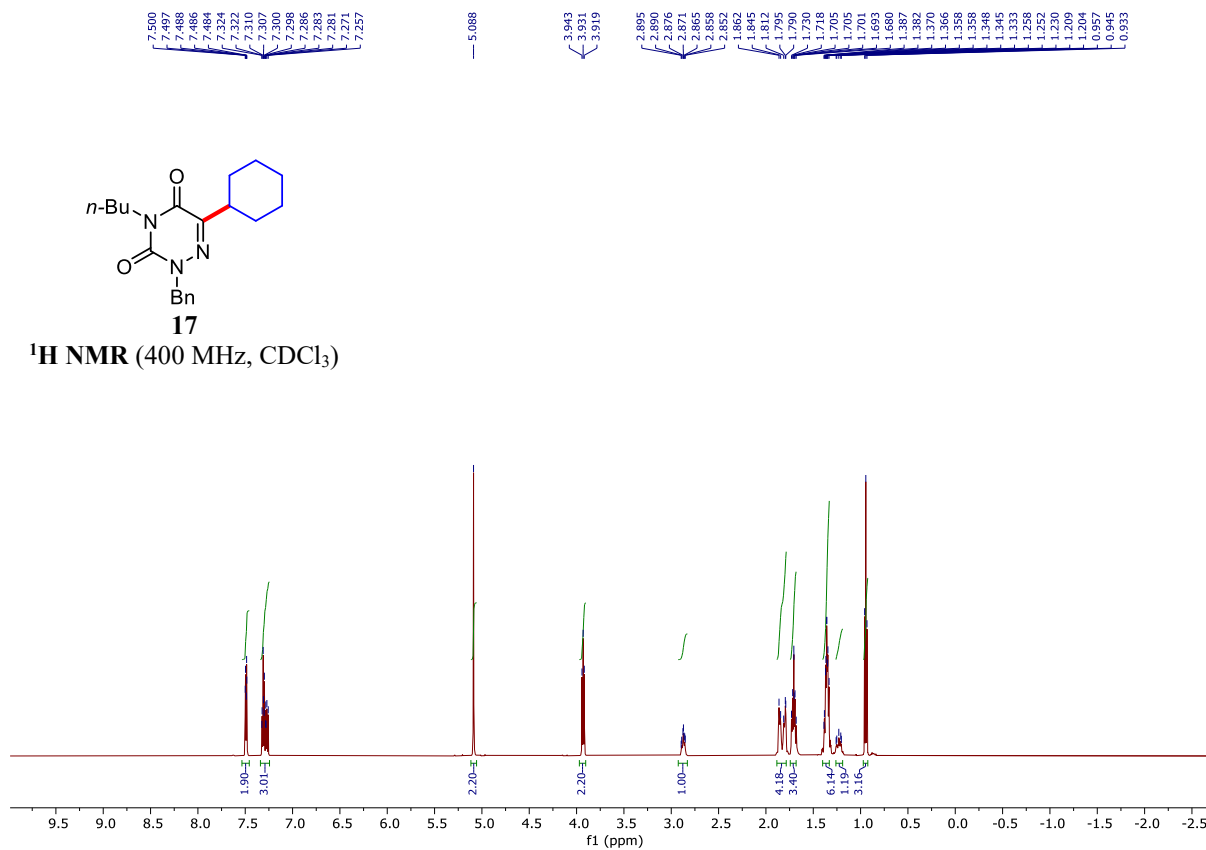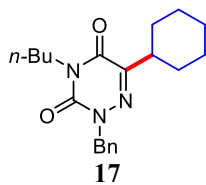

$^{13}\text{C}$  NMR (151 MHz,  $\text{CDCl}_3$ )

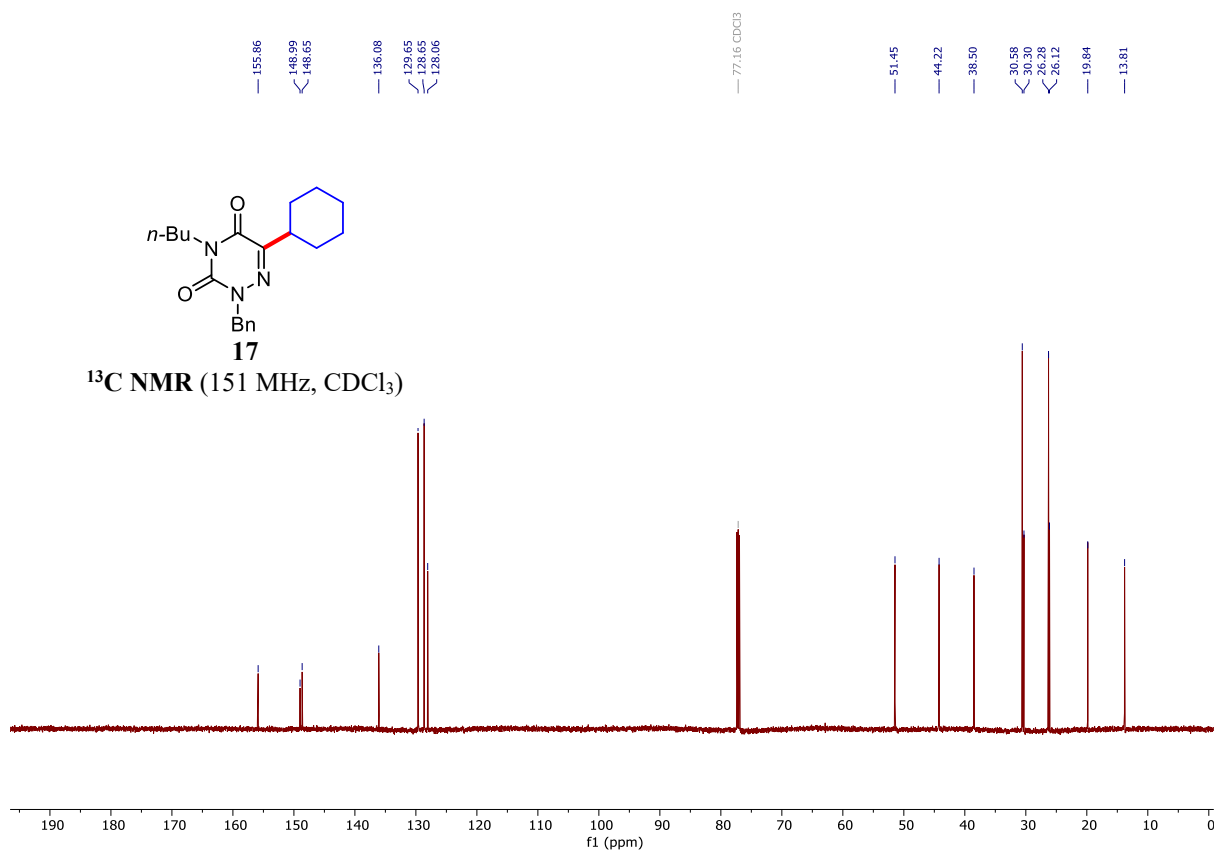

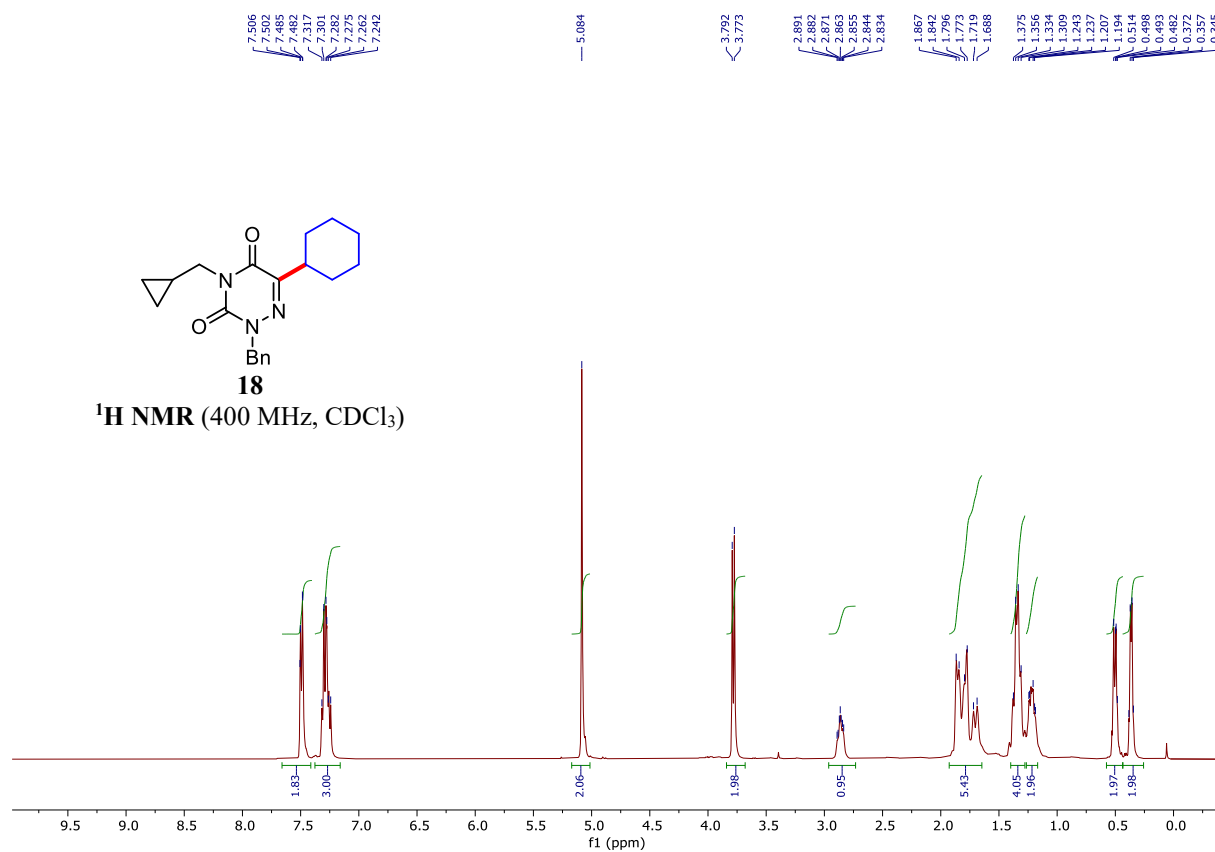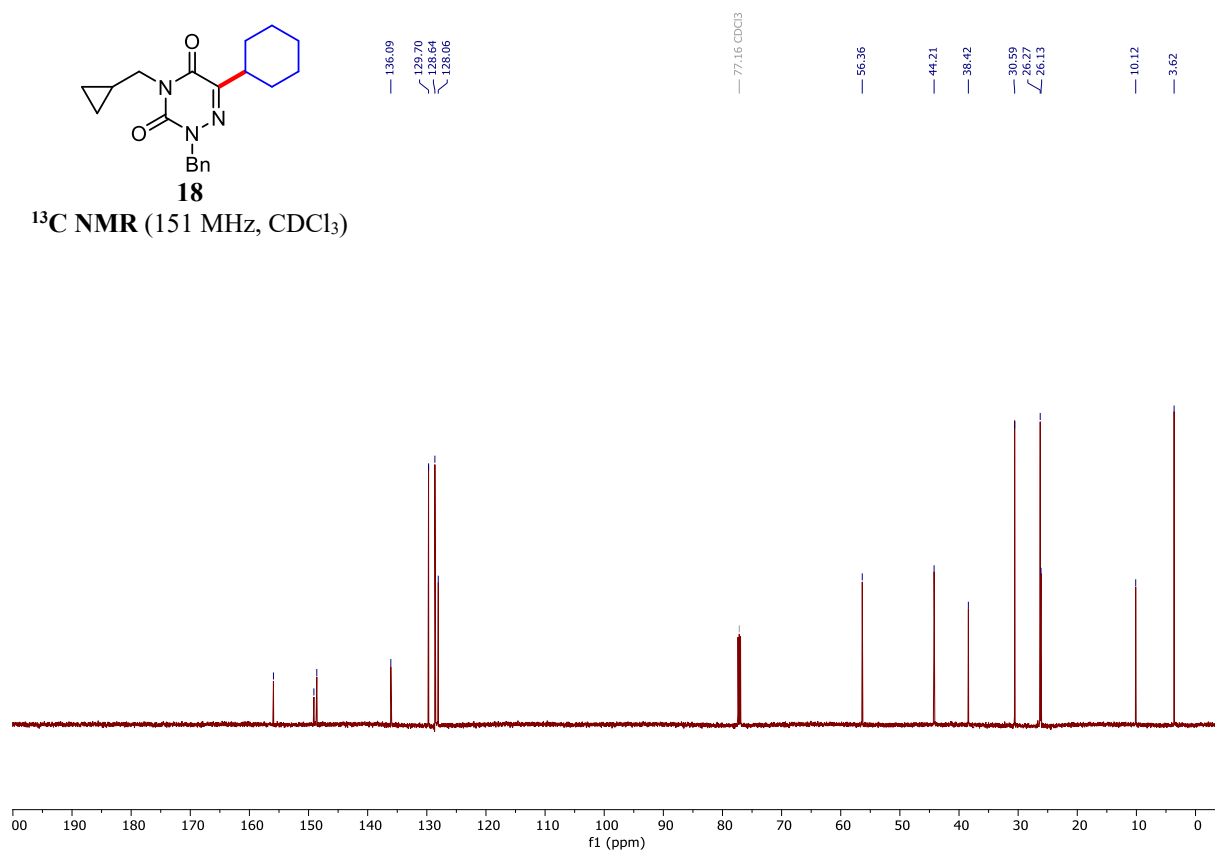

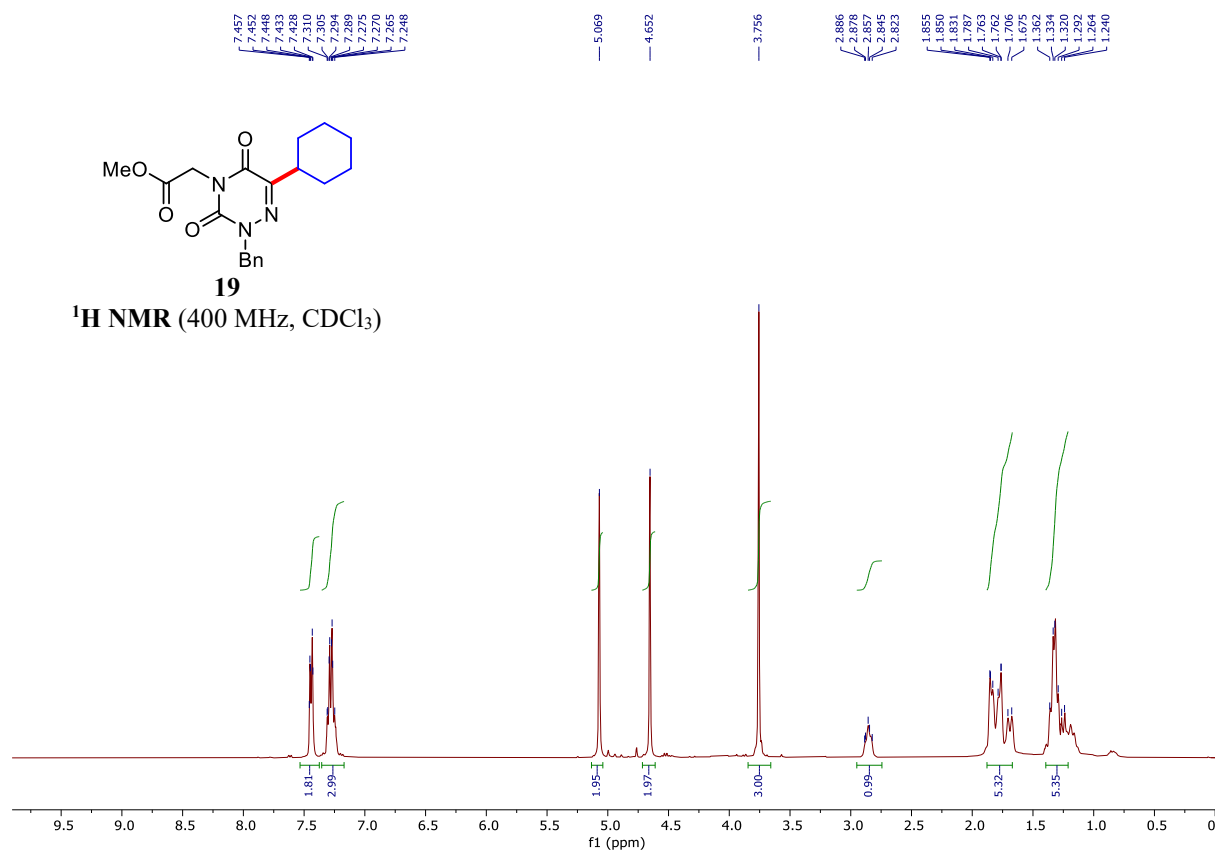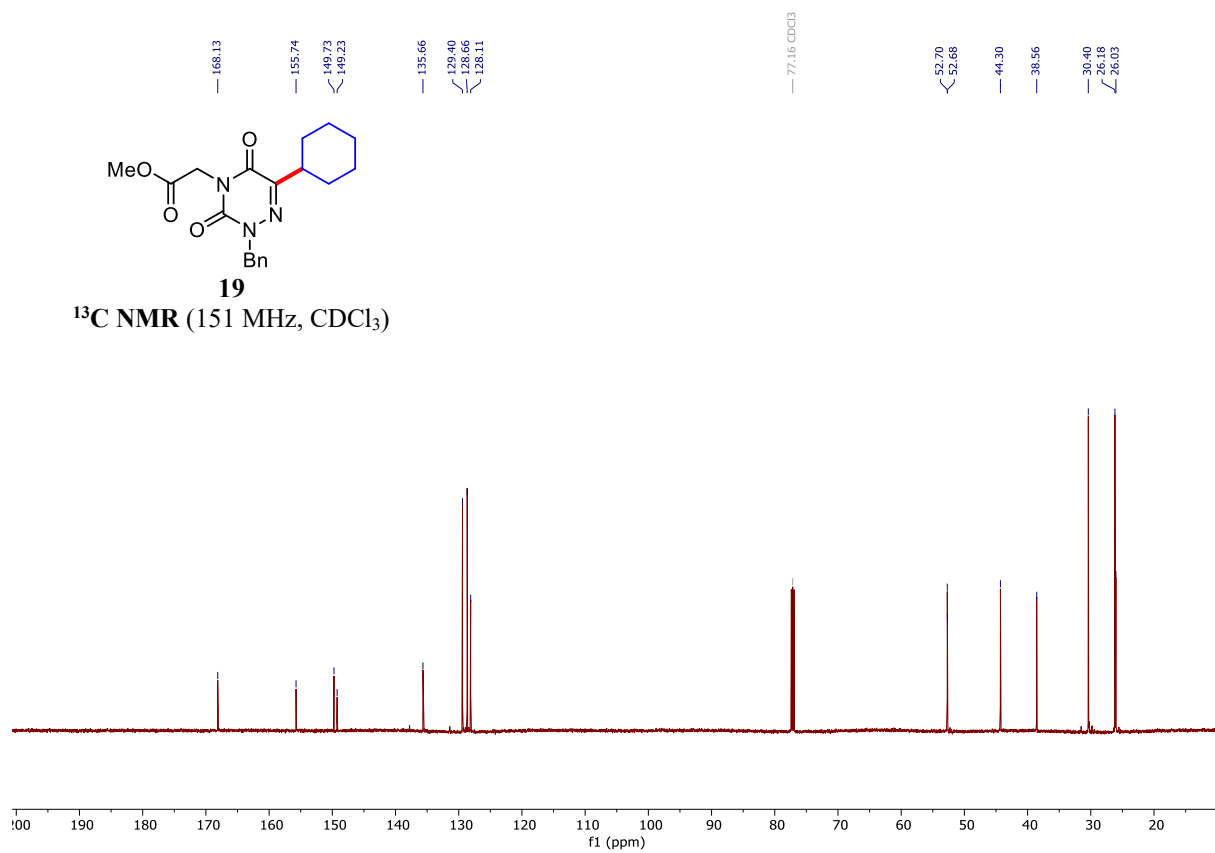

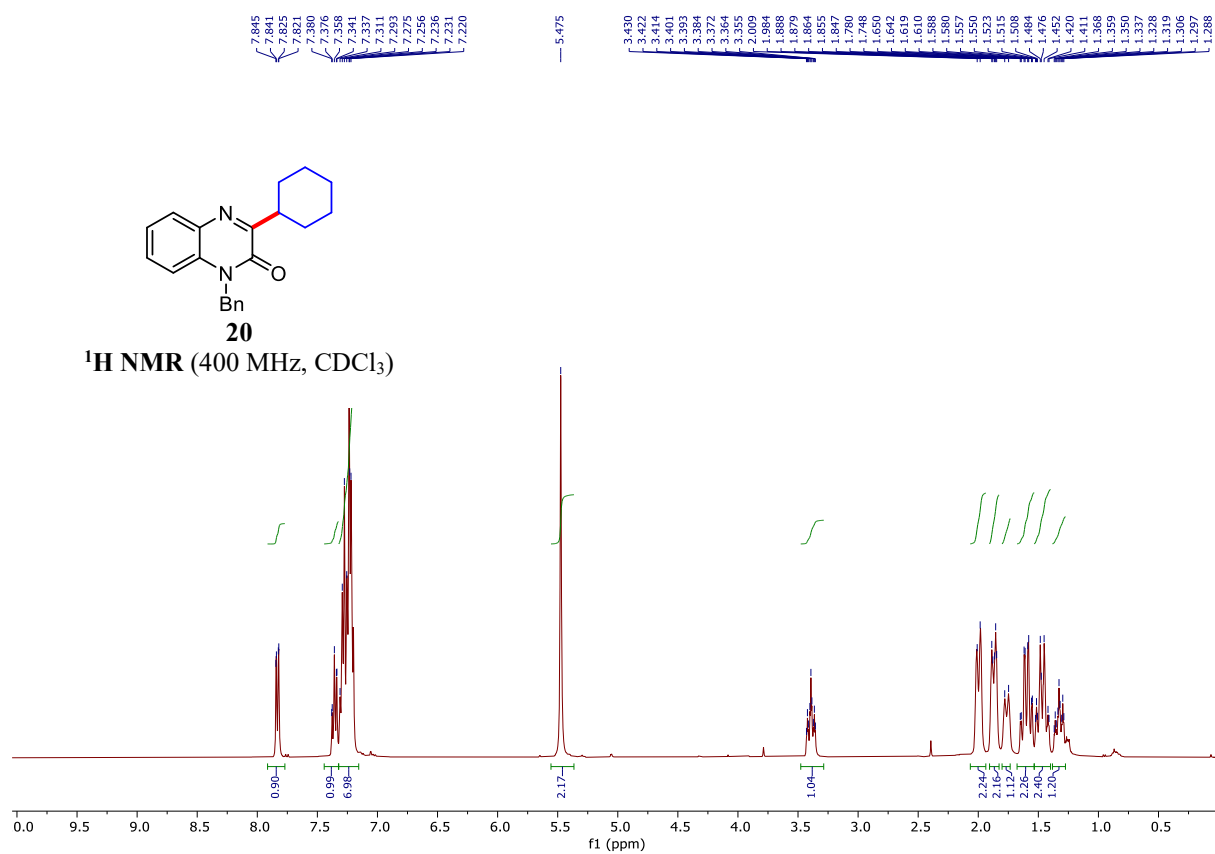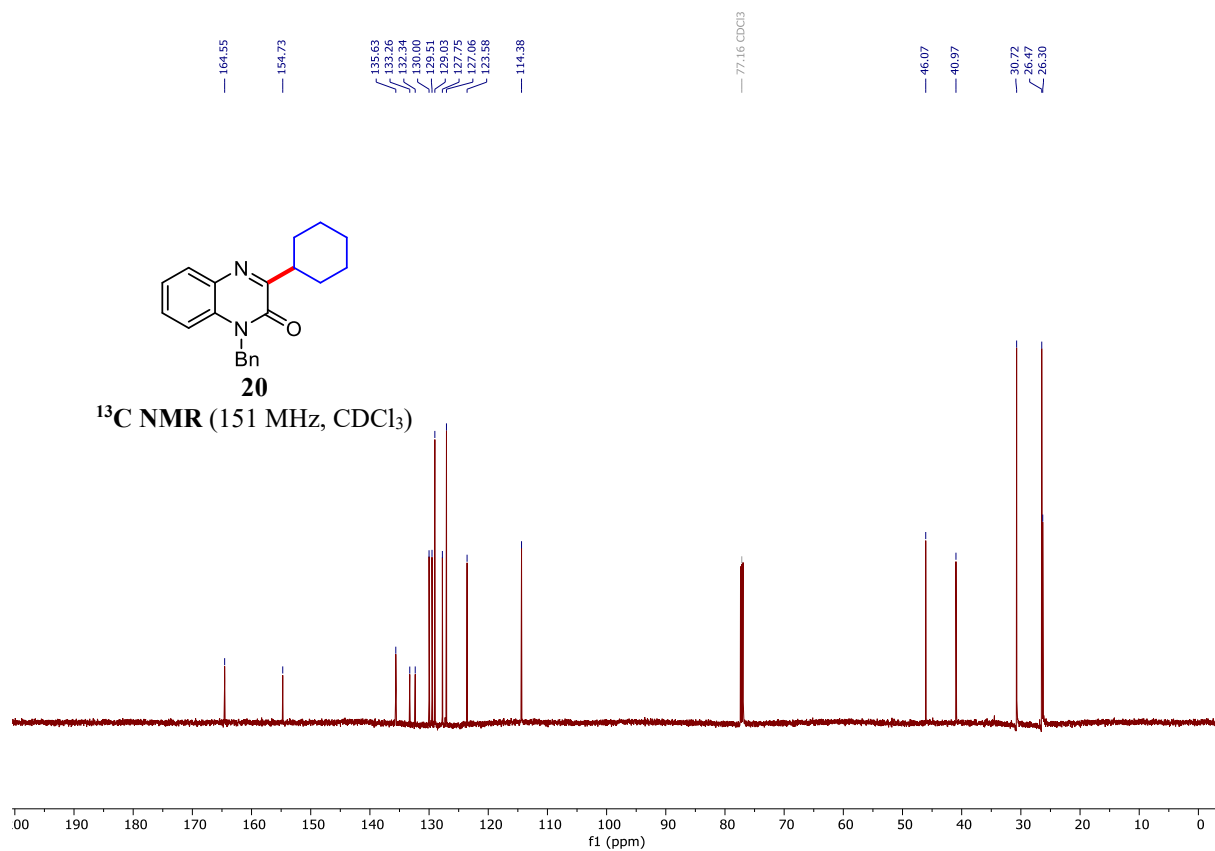

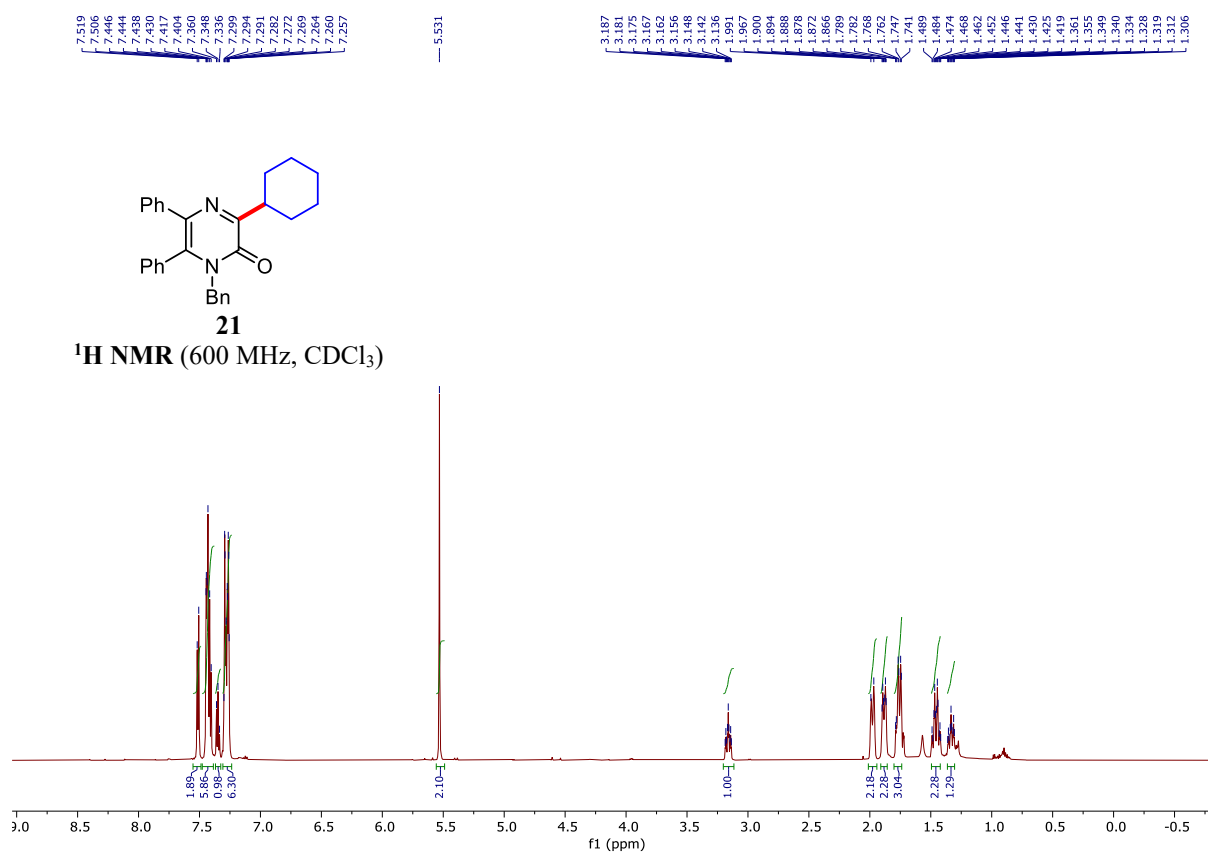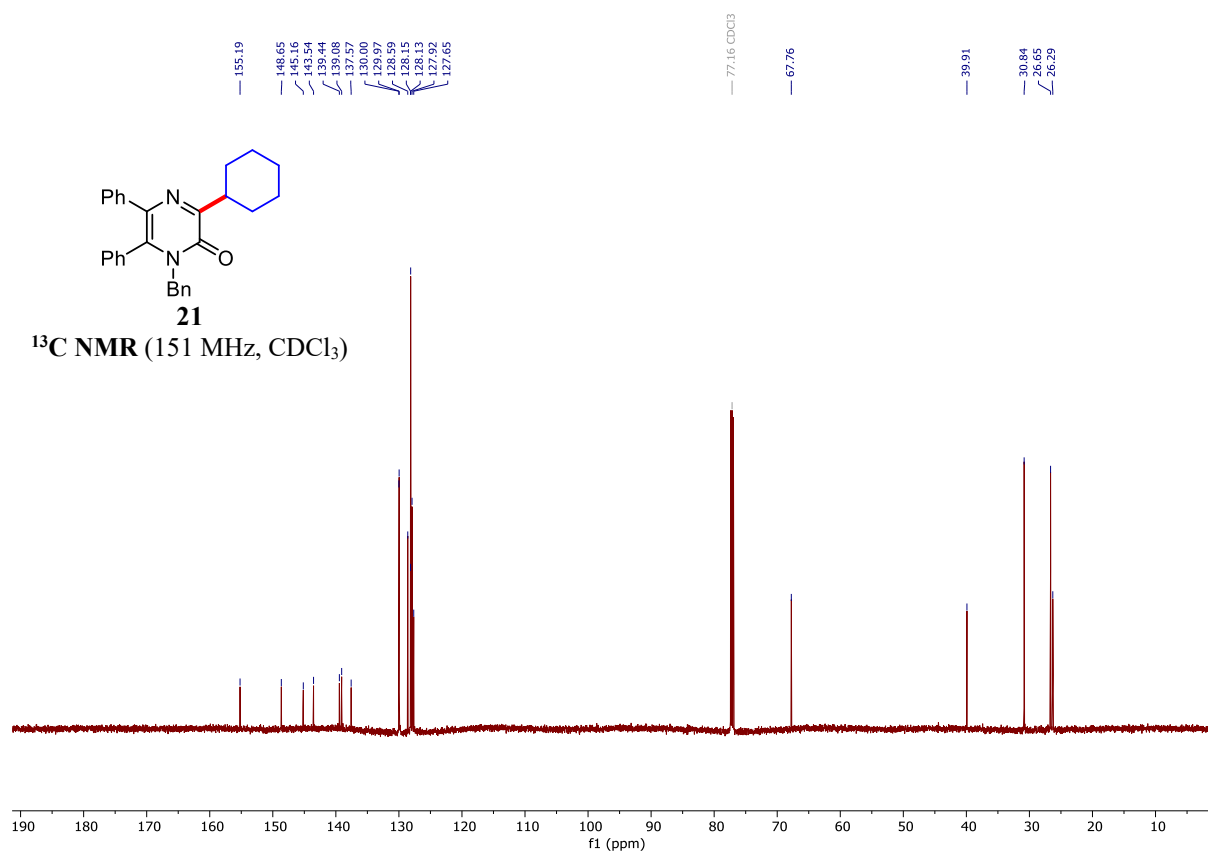

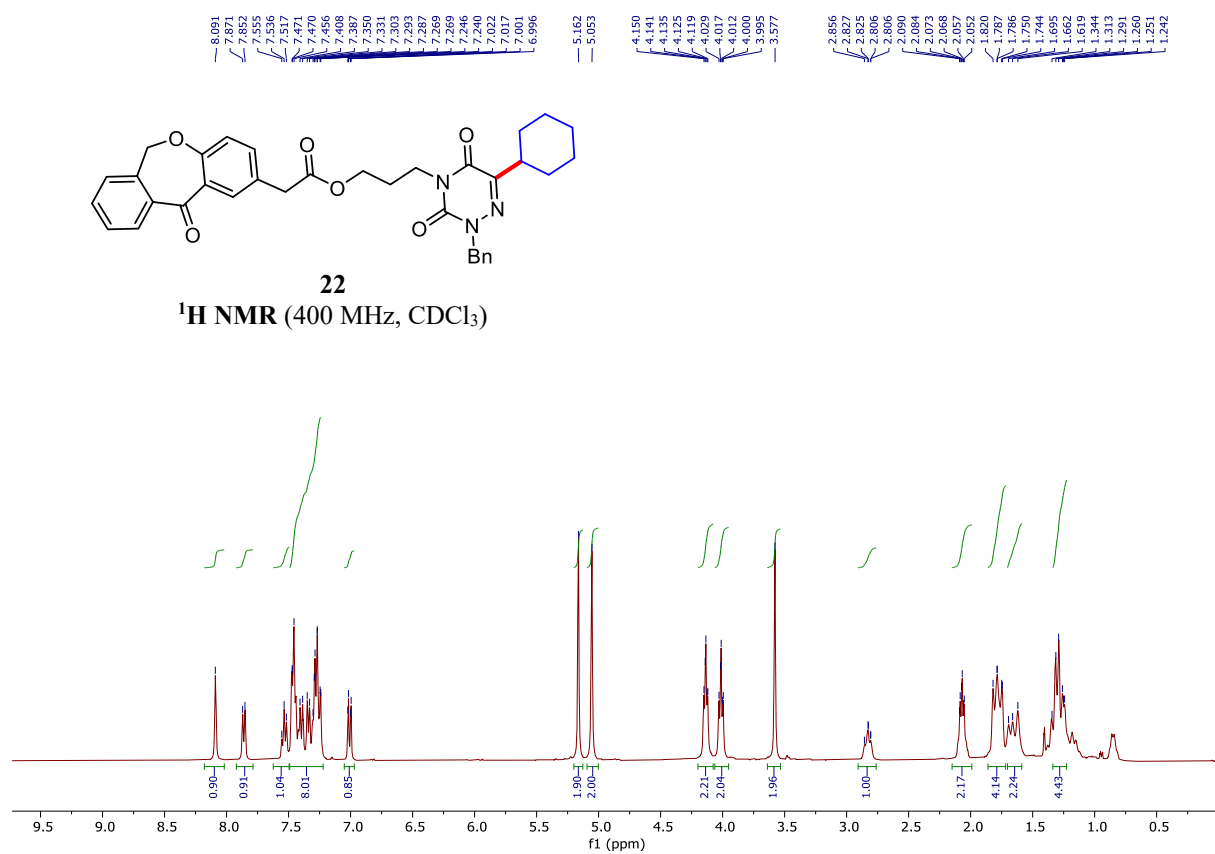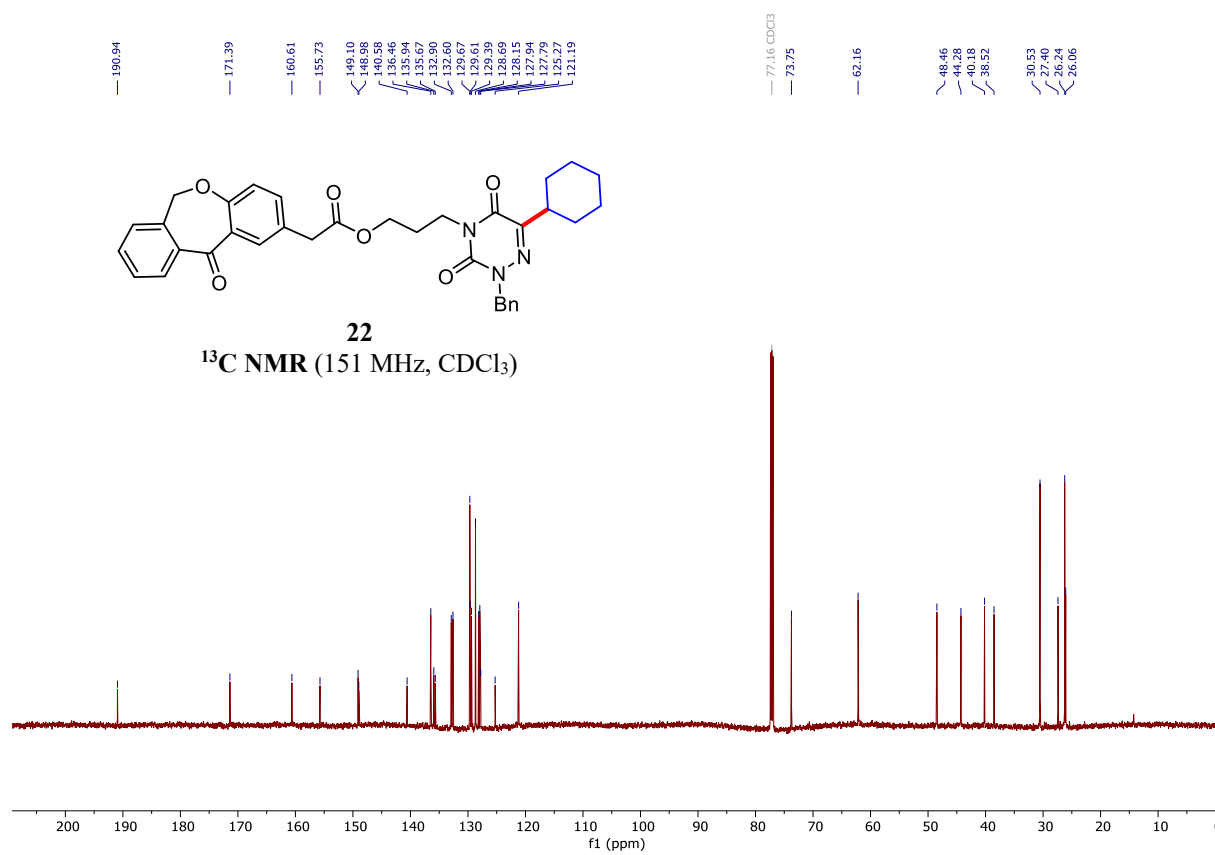

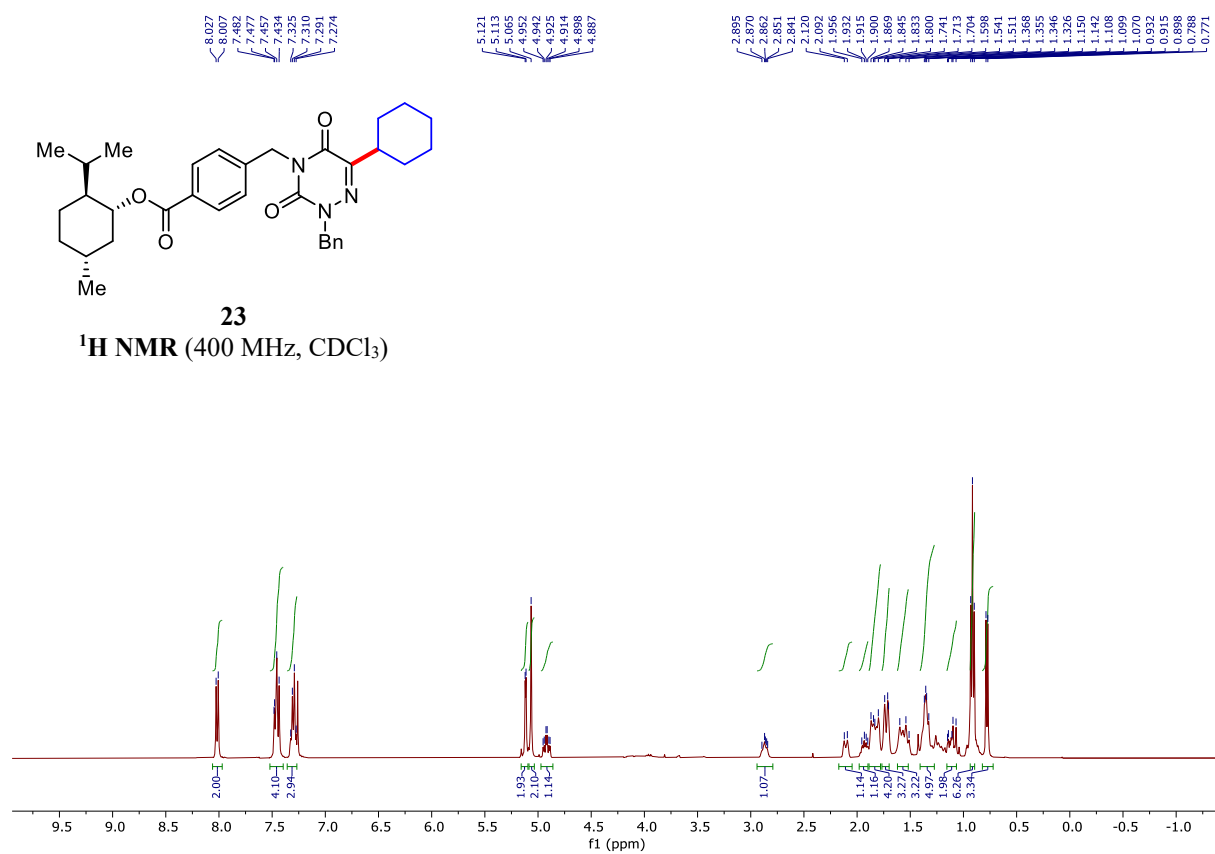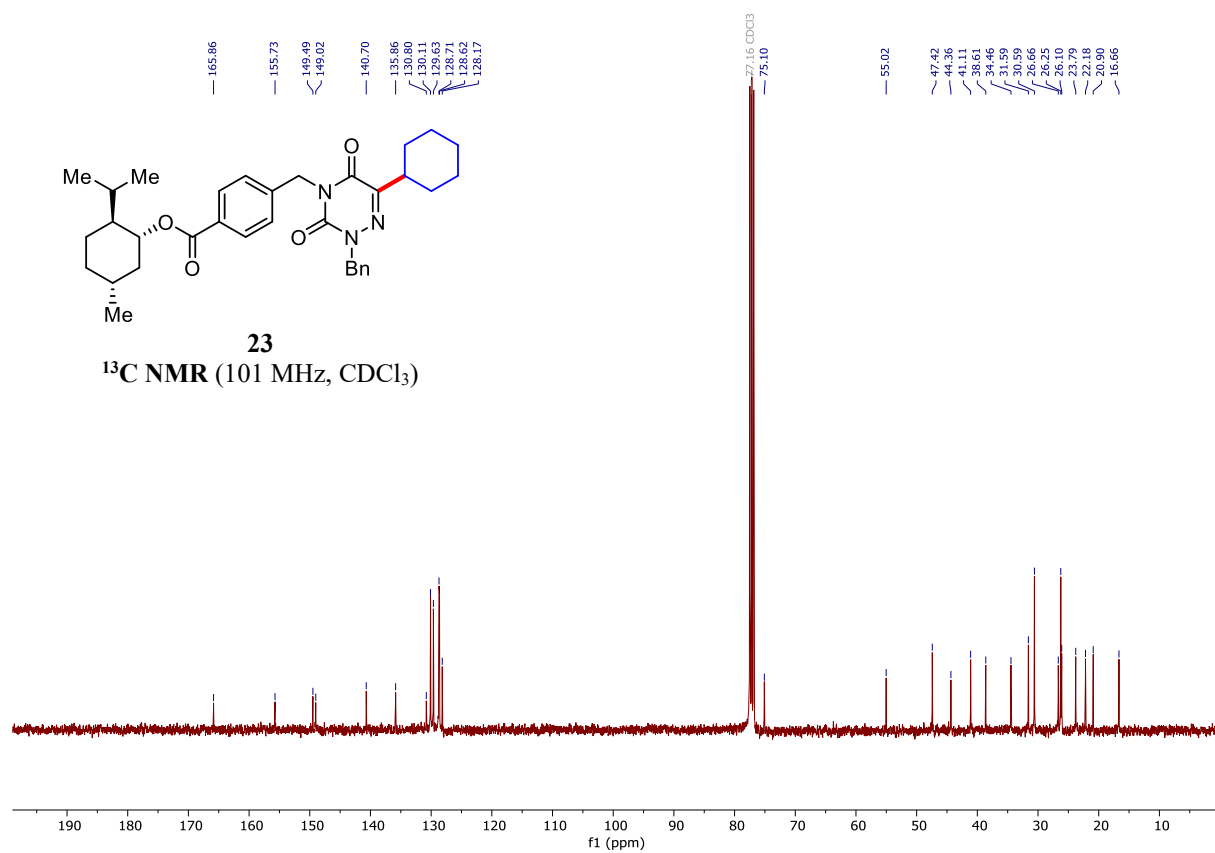

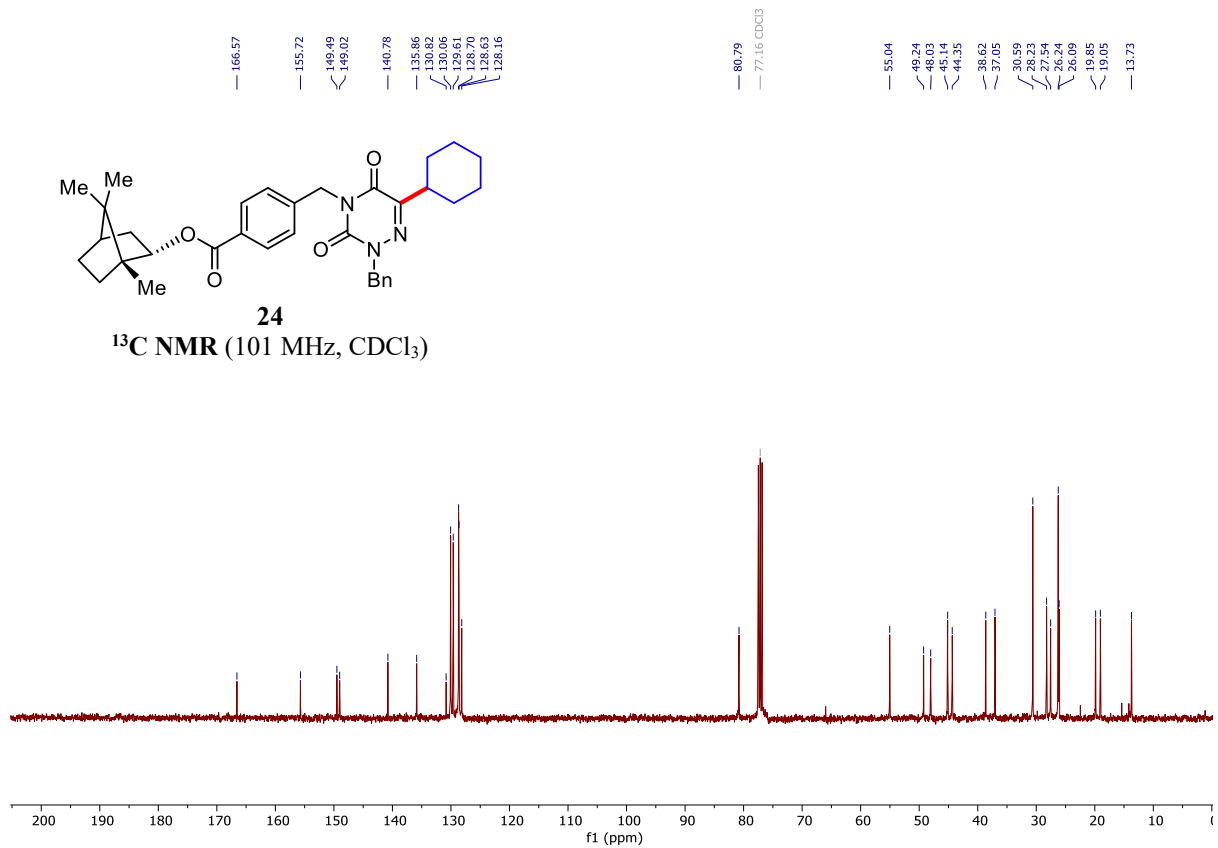



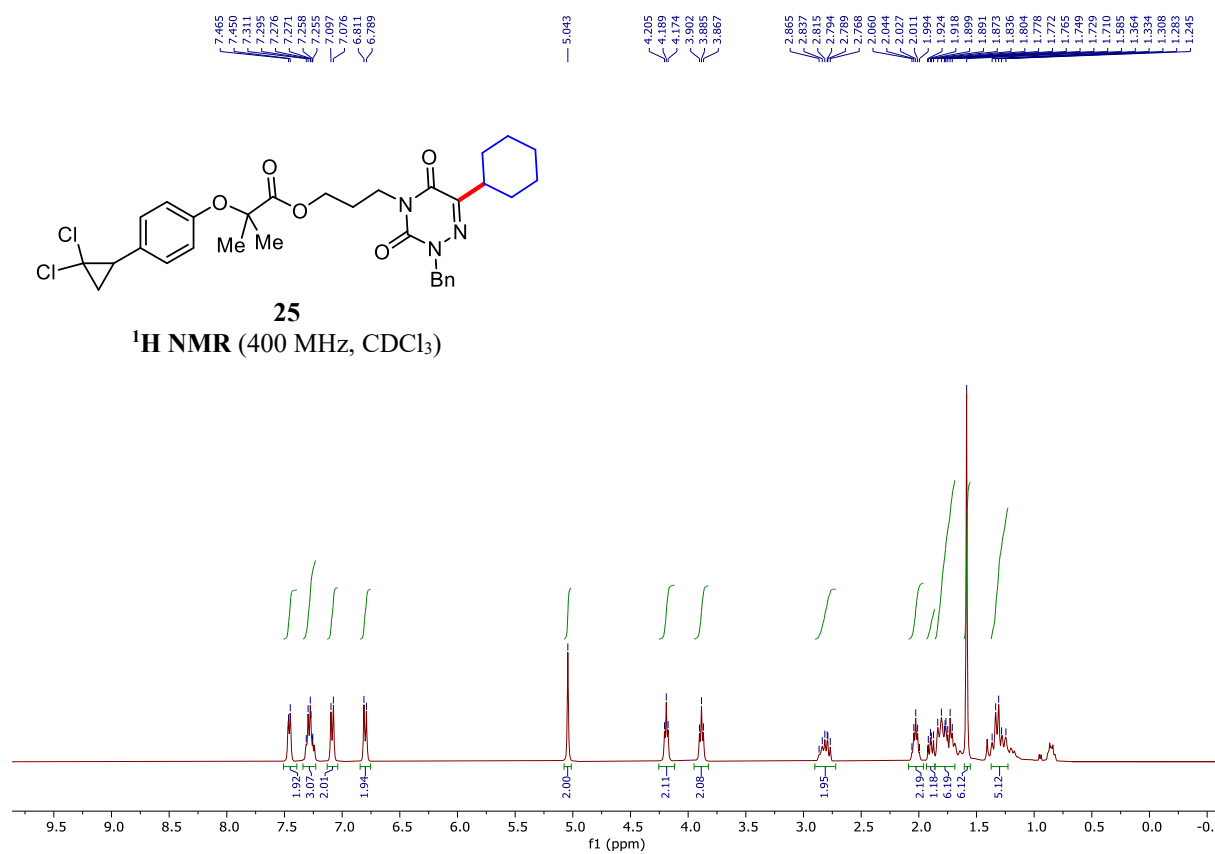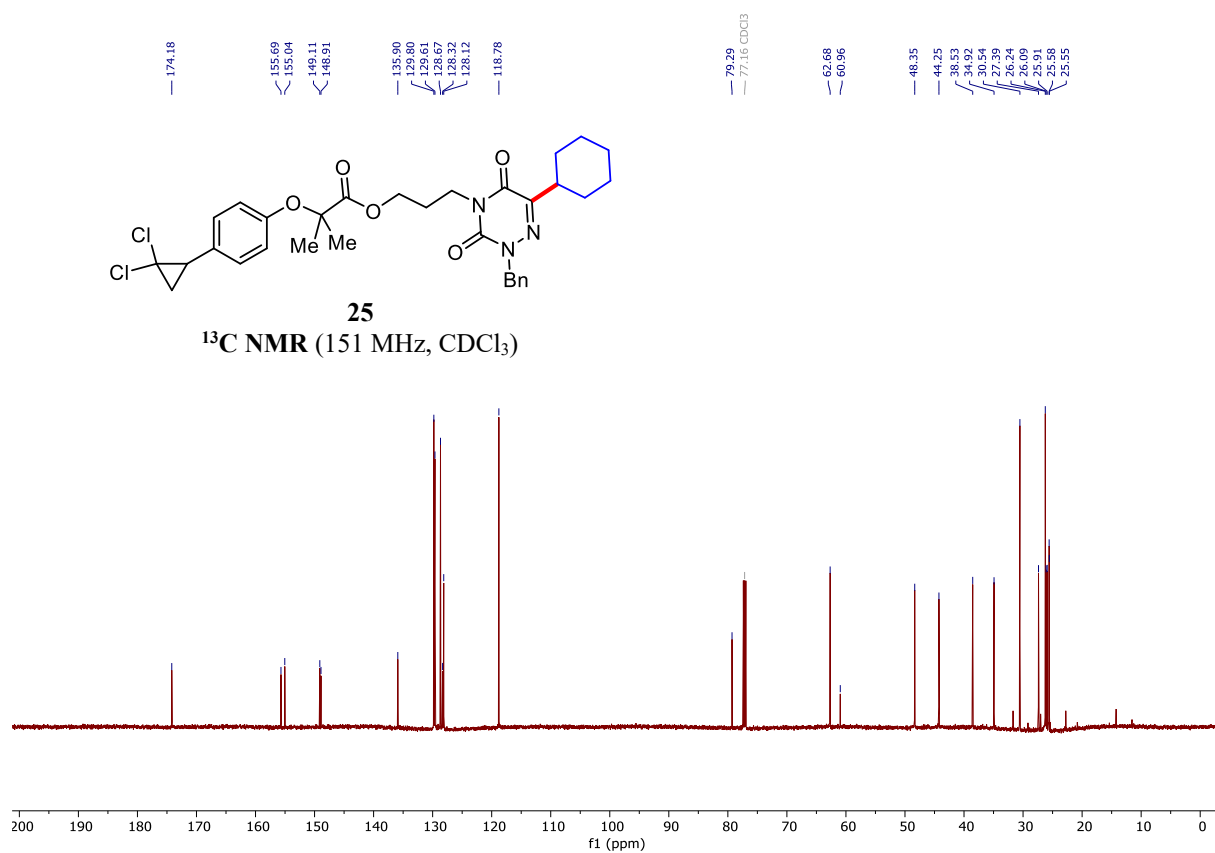

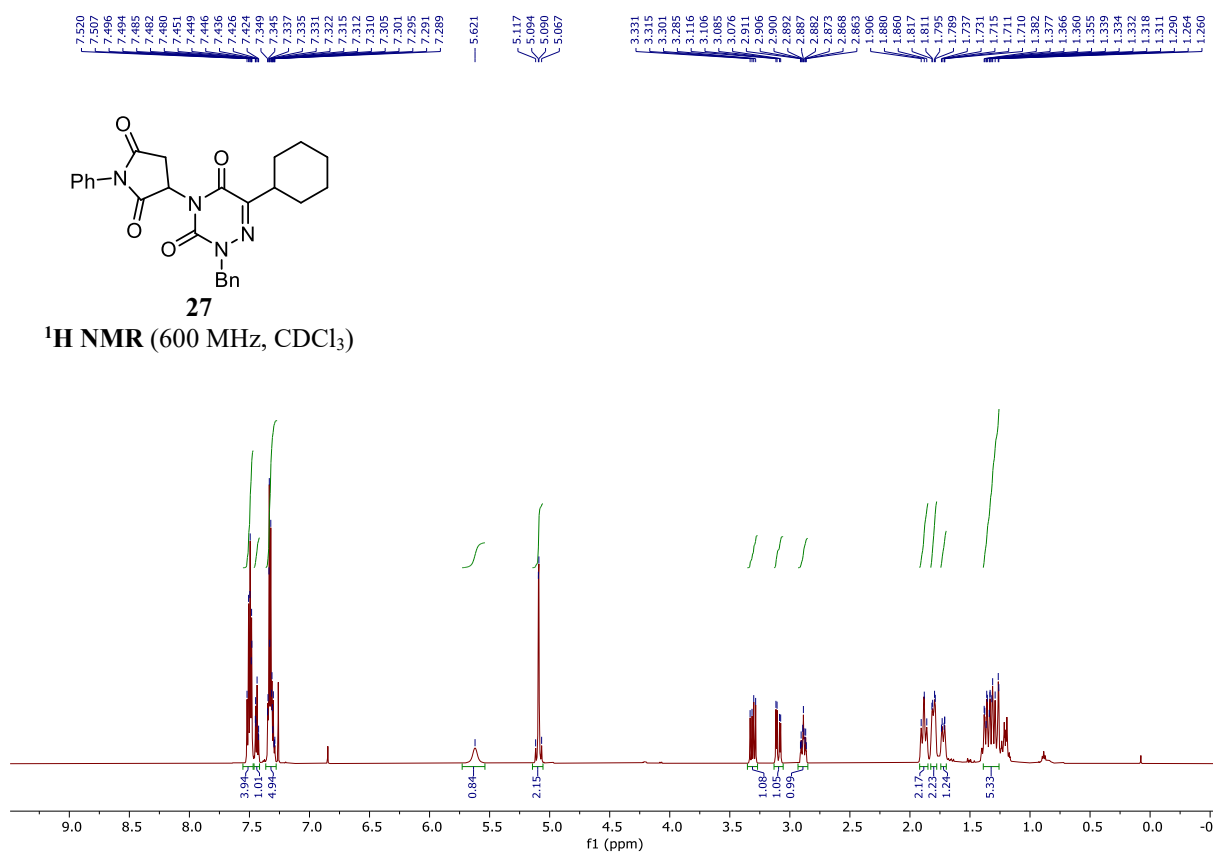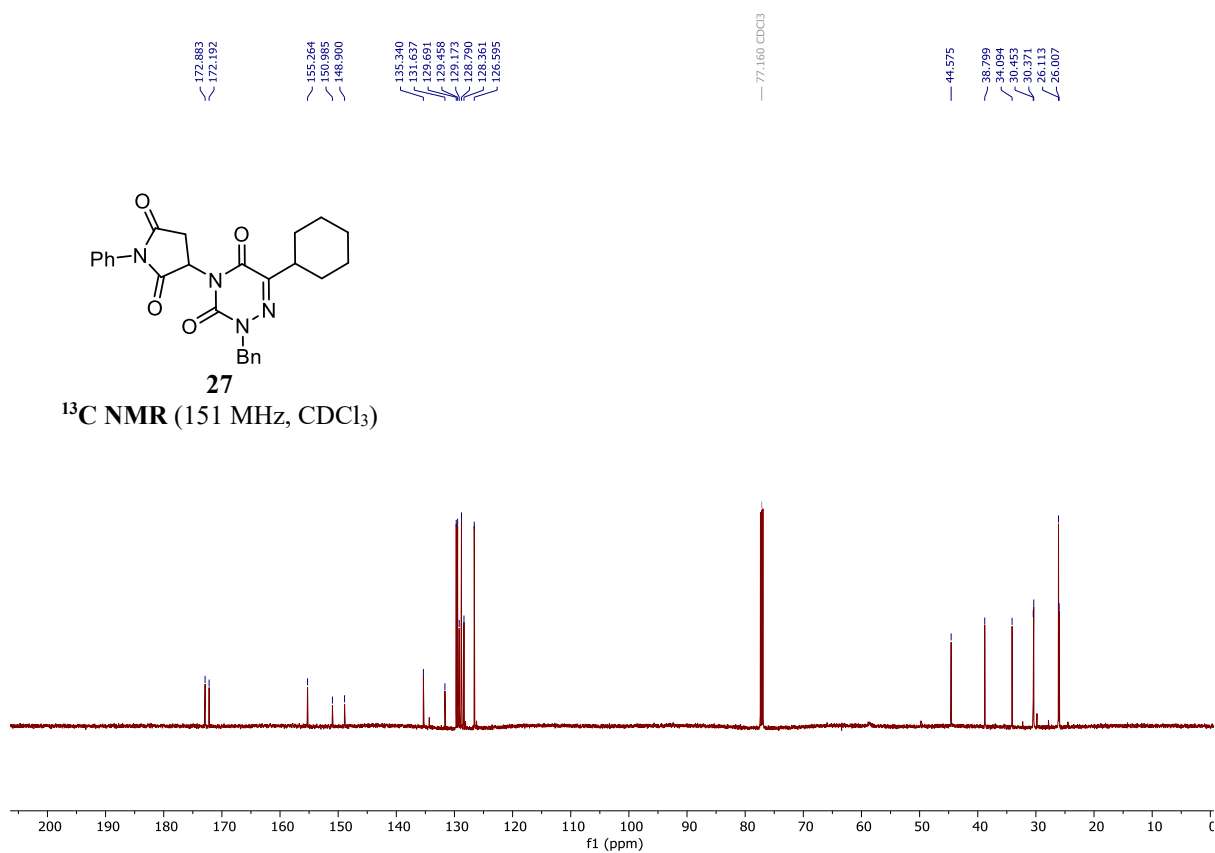

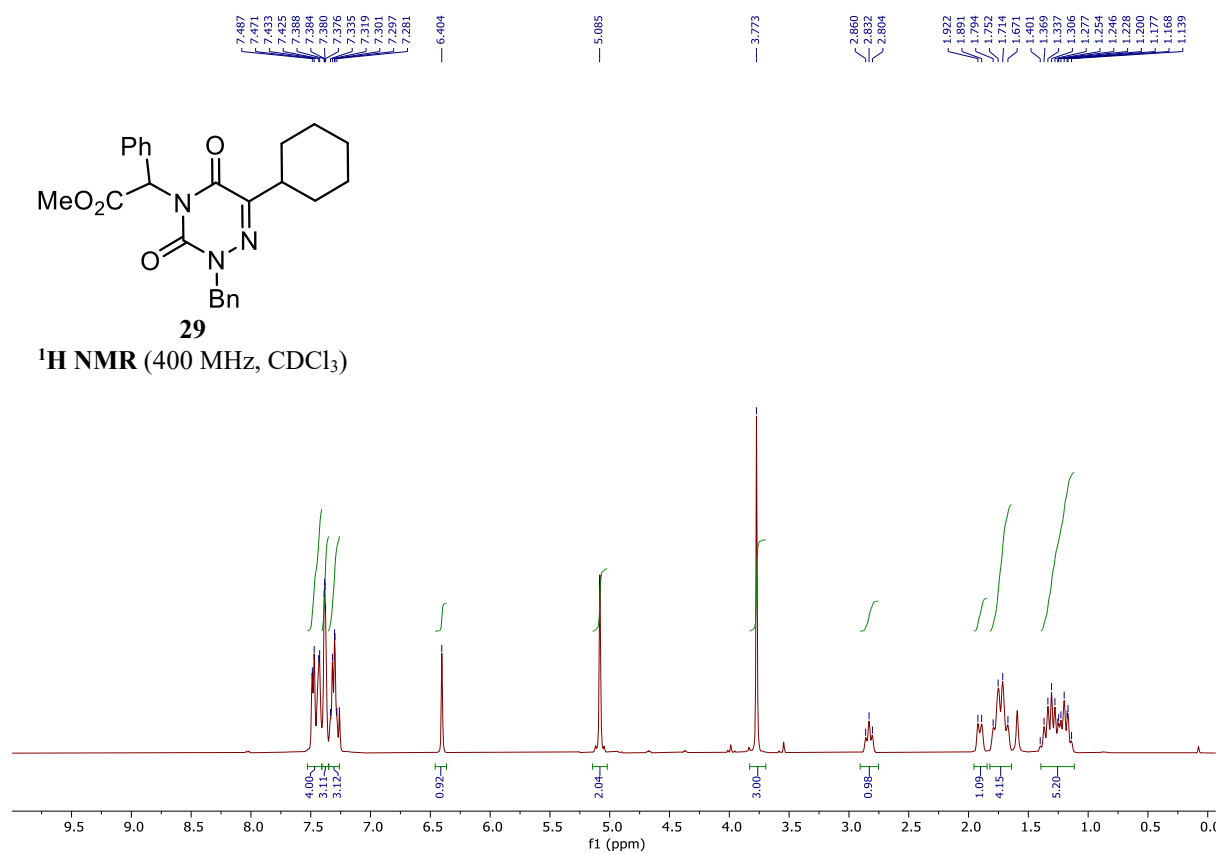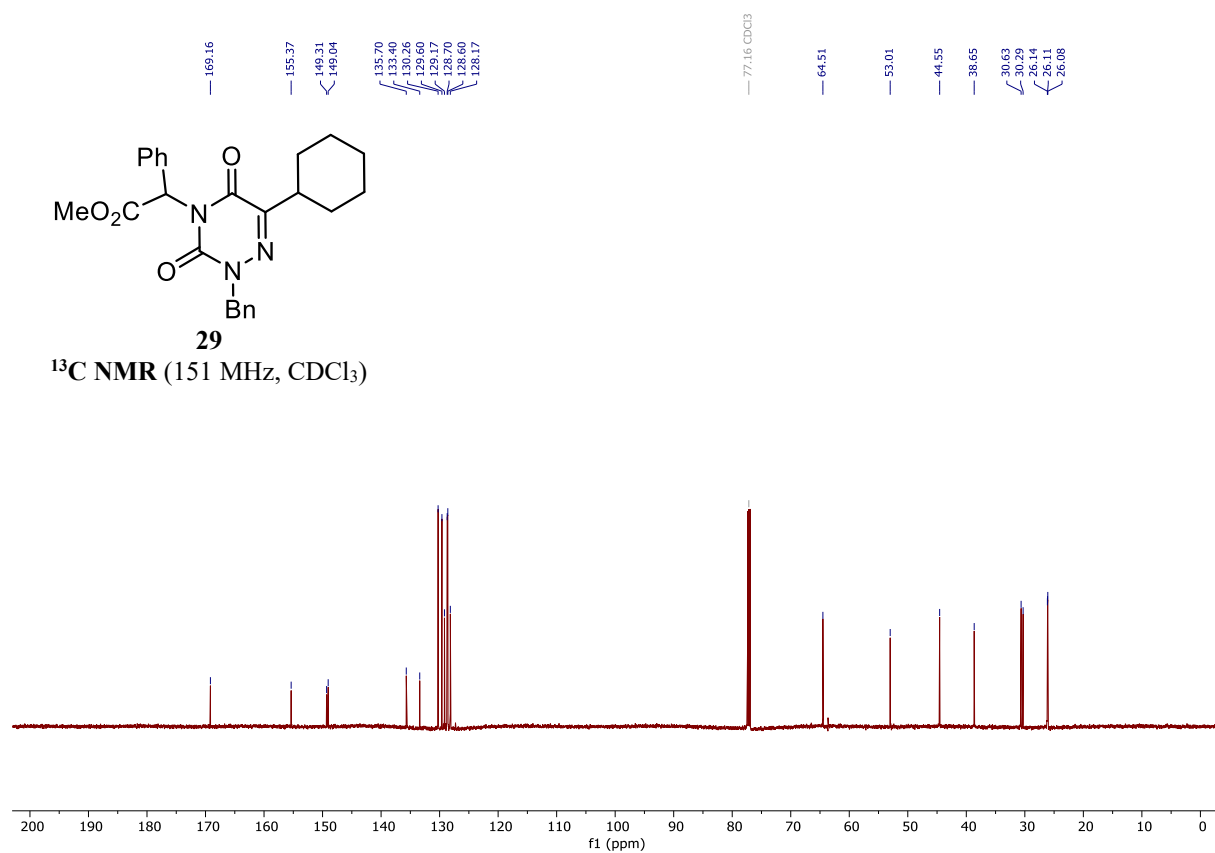

Supplement: d5cc01836f1.pdf [file d5cc01836f1.pdf]
